# Supplementary material
Source: publisher figshare collection journal article supplement (https://acs.figshare.com/ndownloader/files/23857150)

## Supporting Information

### Imine Amidation Catalyzed by a Chiral VAPOL Calcium Phosphate

Rui Cao<sup>†</sup> and Jon C. Antilla\*<sup>†,‡</sup>

<sup>†</sup> School of Pharmaceutical Science and Technology, Tianjin University, Tianjin 300072, P. R. China.

<sup>‡</sup> School of Sciences, Zhejiang Sci-Tech University, Hangzhou 310018, P. R. China

\*Email : [jantilla@tju.edu.cn](mailto:jantilla@tju.edu.cn)

#### CONTENTS

|                                                                     |    |
|---------------------------------------------------------------------|----|
| General considerations.....                                         | 2  |
| General procedure for the amidation of imines .....                 | 2  |
| Characterization data for amination products ( <b>3a-3x</b> ) ..... | 3  |
| Large scale reaction reaction producing <b>3p</b> .....             | 29 |
| Crystal growth conditions and data.....                             | 30 |
| References .....                                                    | 32 |
| <sup>1</sup> H-NMR, <sup>13</sup> C-NMR spectra data .....          | 33 |

**General considerations:** All reactions were carried out in flame or oven-dried reaction test tubes and run under a dry argon atmosphere with magnetic stirring. Dry ether and dry toluene was obtained by filtration of reagent-grade solvent through an Innovative Technologies solvent drying system. (*R*)-VAPOL was synthesized according to the literature procedure and used for all catalysts.<sup>1</sup> Ca[(*R*)-**PA**]<sub>2</sub> was prepared as the reported procedures.<sup>2</sup> All imines were synthesized according to the literature procedure<sup>3</sup> and distilled before use. Sulfonamides and BINOL were purchased from commercial sources.

Thin layer chromatography was performed on Merck TLC plates (silica gel 60 F254). Visualization was accomplished UV light (254nm), flash column chromatography was performed with silica gel (200-300 mesh). The HRMS data were measured on a Thermo Fisher Q Exactive HF LC-MS. The mass analyzer type used for the HRMS measurements was Q-TOF. Optical rotations were measured on a Rudolph Research Analytical Autopol IV polarimeter ( $\lambda$  589) using a 700- $\mu$ L cell with a path length of 0.5 dm. Melting points were determined with a Micromelting point apparatus without correction. Enantiomeric excess (*ee*) was determined using a Shimadzu HPLC LC-20AT, SPD-20A UV/VIS detector, and CTO-20A column oven. Column conditions are reported in the experimental section below. H and C NMR spectra were recorded on 400 MHz or 600 MHz spectrometer at 25 °C. Bruker Avance III instrument with chemical shifts reported relative to tetramethylsilane (TMS). The absolute configuration of 3a-3x were determined to be “(*S*)” by HPLC spectrum to the reported literature values and X-ray. Compounds synthesized in the literature were characterized by matching their data with the reported values.

#### General procedure for the amidation of imines

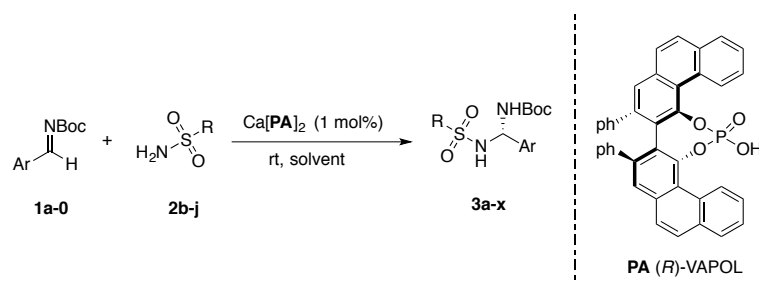

The BOC-imine (0.25 mmol), nucleophile (0.125 mmol) and the catalyst Ca[(*R*)-**PA**]<sub>2</sub> (1-5mol%) were weighted into a dry test tube. The atmosphere was exchanged with argon three times, and anhydrous toluene or ether (2.0 mL) was added *via* syringe. The reaction mixture was stirred at ambient temperature for the desired reaction time as judged by TLC. Upon completion, solvent was removed under vacuo and the residue was purified by silica gel chromatography (Hexane/Acetone = 10/1 to 4/1) to provide chiral product **3a-x**. All racemic samples were

prepared by using calcium BINOL phosphate salt (20 mol%) as catalyst and their chiral HPLC retention time data were compared just prior to authentic samples with enantiomeric excess.

**Characterization data for animal products (3a-3x)**

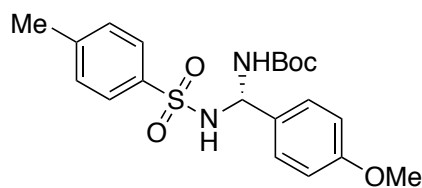

**3a**

**(*S*)-tert-butyl (4-methoxyphenyl)(4-methylphenylsulfonamidomethyl)carbamate (3a)** The reaction was performed in 0.125mmol scale for 15h using 1 mol% Ca[(*R*)-**PA**]<sub>2</sub> in toluene. The product was obtained by flash chromatography (hexane: acetone = 6:1) as a white solid 25mg, 99% yield, >99% *ee*. HPLC analysis (Chiralcel OD-H, 1.0 mL/min, 80:20 hexanes/iPrOH): *t*<sub>R</sub>(minor) = 7.97 min, *t*<sub>R</sub>(major) = 12.43 min. [ $\alpha$ ]<sub>D</sub><sup>20</sup> = +5.67 (*c* = 0.275, CHCl<sub>3</sub>). <sup>1</sup>H NMR (600 MHz, Acetone-*d*<sub>6</sub>)  $\delta$  7.78 (d, *J* = 8.2 Hz, 2H), 7.35 (d, *J* = 8.0 Hz, 2H), 7.31 (d, *J* = 8.3 Hz, 2H), 7.02 (d, *J* = 8.7 Hz, 1H), 6.91 – 6.84 (m, 2H), 6.55 (s, 1H), 6.13 (s, 1H), 3.78 (s, 3H), 2.42 (s, 3H), 1.32 (s, 9H). <sup>13</sup>C NMR (150 MHz, Acetone-*d*<sub>6</sub>)  $\delta$  160.4, 155.2, 143.6, 140.3, 133.1, 130.2, 128.3, 128.0, 114.5, 79.5, 64.1, 55.6, 28.5, 21.4. HRMS (ESI) Calcd for C<sub>20</sub>H<sub>26</sub>N<sub>2</sub>NaO<sub>5</sub>S ([M+Na]<sup>+</sup>) 429.1455, found 429.1459.

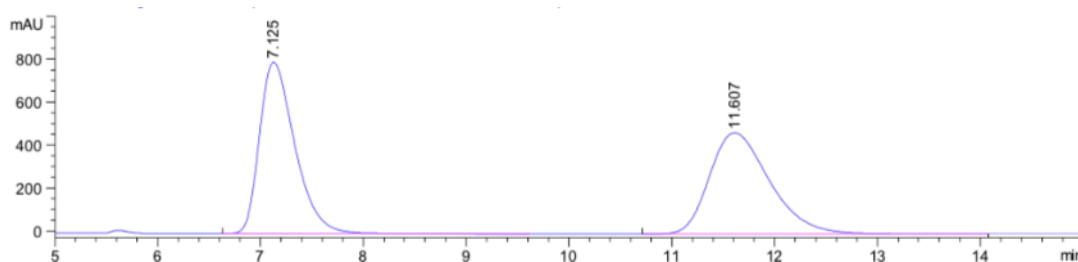

Signal 1: DAD1 A, Sig=220,4 Ref=off

| Peak # | RetTime [min] | Type | Width [min] | Area [mAU*s] | Height [mAU] | Area %  |
|--------|---------------|------|-------------|--------------|--------------|---------|
| 1      | 7.125         | BB   | 0.3663      | 1.90102e4    | 797.02075    | 49.8836 |
| 2      | 11.607        | BB   | 0.6278      | 1.90989e4    | 470.25076    | 50.1164 |

Totals : 3.81091e4 1267.27151

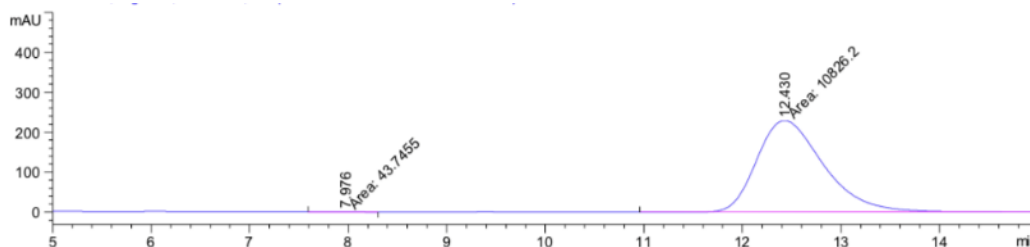

Signal 1: DAD1 A, Sig=220,4 Ref=360,100

| Peak # | RetTime [min] | Type | Width [min] | Area [mAU*s] | Height [mAU] | Area %  |
|--------|---------------|------|-------------|--------------|--------------|---------|
| 1      | 7.976         | MM   | 0.5735      | 43.74552     | 1.27134      | 0.4024  |
| 2      | 12.430        | MM   | 0.7866      | 1.08262e4    | 229.39241    | 99.5976 |

Totals : 1.08699e4 230.66375

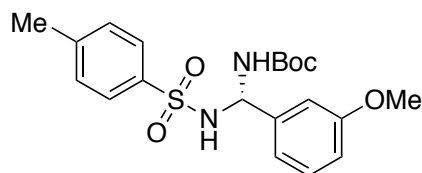

**3b**

**(*S*)-tert-butyl (3-methoxyphenyl)(4-methylphenylsulfonamido)methylcarbamate (3b)** The reaction was performed in 0.125mmol scale for 50h using 1 mol% Ca[(*R*)-**PA**]<sub>2</sub> in toluene. The product was obtained by flash chromatography (hexane: acetone = 6:1) as a white solid 23mg, 91% yield, 97% *ee*. M.P.: 137-138 °C. HPLC analysis (Chiralcel OD-H, 1.0 mL/min, 90:10 hexanes/*i*PrOH): *t*<sub>R</sub>(minor) = 10.86 min, *t*<sub>R</sub>(major) = 14.21 min. [ $\alpha$ ]<sub>D</sub><sup>20</sup> = -1.52 (*c* = 0.290, CHCl<sub>3</sub>). <sup>1</sup>H NMR (600 MHz, Acetone-*d*<sub>6</sub>)  $\delta$  7.82 – 7.75 (m, 2H), 7.36 (d, *J* = 5.8 Hz, 2H), 7.24 (t, *J* = 8.1 Hz, 1H), 7.14 (d, *J* = 8.8 Hz, 1H), 6.99 – 6.92 (m, 2H), 6.84 (dd, *J* = 7.9, 2.1 Hz, 1H), 6.67 (s, 1H), 6.16 (t, *J* = 9.0 Hz, 1H), 3.75 (s, 3H), 2.42 (s, 3H), 1.33 (s, 9H). <sup>13</sup>C NMR (150 MHz, Acetone-*d*<sub>6</sub>)  $\delta$  160.8, 155.2, 143.7, 142.6, 140.3, 130.3, 130.3, 128.0, 119.2, 114.3, 112.7, 79.6, 64.4, 55.5, 28.5, 21.4. HRMS (ESI) Calcd for C<sub>20</sub>H<sub>26</sub>N<sub>2</sub>NaO<sub>5</sub>S ([M+Na]<sup>+</sup>) 429.1455, found 429.1449.

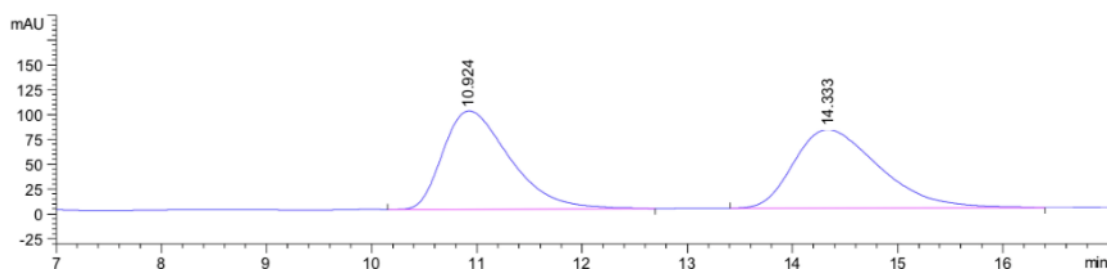

Signal 2: DAD1 B, Sig=220,4 Ref=off

| Peak # | RetTime [min] | Type | Width [min] | Area [mAU*s] | Height [mAU] | Area %  |
|--------|---------------|------|-------------|--------------|--------------|---------|
| 1      | 10.924        | BB   | 0.6755      | 4371.80273   | 98.94780     | 49.4214 |
| 2      | 14.333        | BB   | 0.8719      | 4474.17139   | 79.09678     | 50.5786 |

Totals : 8845.97412 178.04458

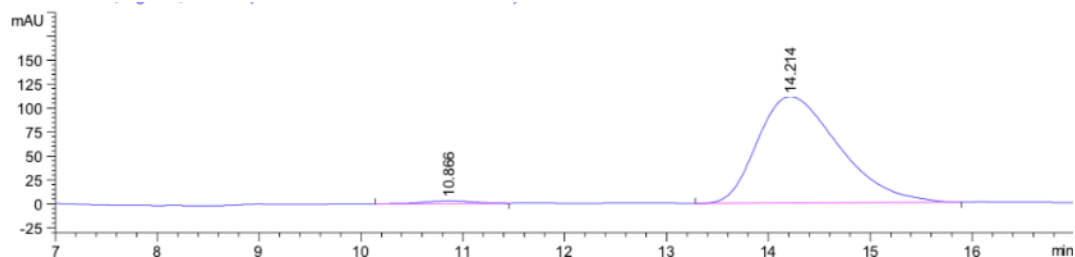

Signal 2: DAD1 B, Sig=220,4 Ref=off

| Peak # | RetTime [min] | Type | Width [min] | Area [mAU*s] | Height [mAU] | Area %  |
|--------|---------------|------|-------------|--------------|--------------|---------|
| 1      | 10.866        | BB   | 0.4877      | 97.67110     | 2.96995      | 1.5562  |
| 2      | 14.214        | BB   | 0.8759      | 6178.64893   | 111.26063    | 98.4438 |

Totals : 6276.32002 114.23057

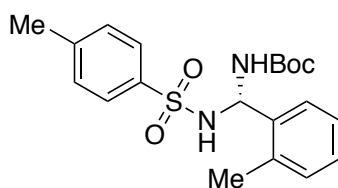

**3c**

**(*S*)-tert-butyl (4-methylphenylsulfonamido)(*o*-tolylmethyl)carbamate (3c)** The reaction was performed in 0.125mmol scale for 9h using 5 mol% Ca[(*R*)-PA]<sub>2</sub> in toluene. The product was obtained by flash chromatography (hexane: acetone = 4:1) as a white solid 21mg, 88% yield, 97% *ee*. M.P.: 168-169 °C. HPLC analysis (Chiralcel OD-H, 1.0 mL/min, 90:10 hexanes/iPrOH): *t<sub>R</sub>*(minor) = 6.13 min, *t<sub>R</sub>*(major) = 7.16 min. [ $\alpha$ ]<sub>D</sub><sup>20</sup> = -1.90 (*c* = 0.315, CHCl<sub>3</sub>). <sup>1</sup>H NMR (600 MHz, Acetone-*d*<sub>6</sub>)  $\delta$  7.78 (d, *J* = 8.2 Hz, 2H), 7.50 (dd, *J* = 7.3, 1.8 Hz, 1H), 7.38 – 7.34 (m, 2H), 7.20 – 7.12 (m, 3H), 7.07 (d, *J* = 7.4 Hz, 1H), 6.67 (s, 1H), 6.42 (t, *J* = 7.3 Hz, 1H), 2.43 (s, 3H), 2.28 (s, 3H), 1.33 (s, 9H). <sup>13</sup>C NMR (150 MHz, Acetone-*d*<sub>6</sub>)  $\delta$  154.9, 143.6, 140.2, 139.2, 136.0, 131.2, 130.2, 128.8, 128.1, 126.9, 126.6, 79.5, 61.7, 28.5, 21.4, 19.0. HRMS (ESI) Calcd for C<sub>20</sub>H<sub>26</sub>N<sub>2</sub>NaO<sub>4</sub>S ([M+Na]<sup>+</sup>) 413.1505, found 413.1505.

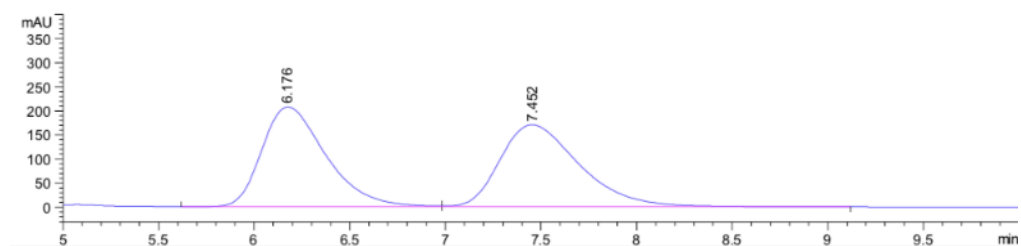

Signal 3: DAD1 C, Sig=220,4 Ref=off

| Peak # | RetTime [min] | Type | Width [min] | Area [mAU*s] | Height [mAU] | Area %  |
|--------|---------------|------|-------------|--------------|--------------|---------|
| 1      | 6.176         | BV   | 0.3562      | 4830.24414   | 206.99649    | 49.4947 |
| 2      | 7.452         | VB   | 0.4443      | 4928.87256   | 170.00095    | 50.5053 |

Totals : 9759.11670 376.99744

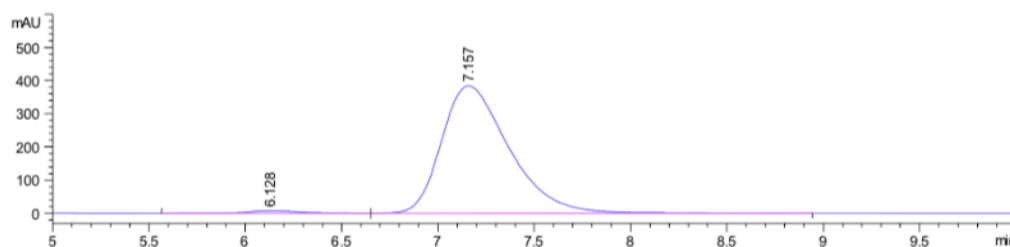

Signal 3: DAD1 C, Sig=220,4 Ref=off

| Peak # | RetTime [min] | Type | Width [min] | Area [mAU*s] | Height [mAU] | Area %  |
|--------|---------------|------|-------------|--------------|--------------|---------|
| 1      | 6.128         | BB   | 0.2894      | 154.91367    | 8.01692      | 1.6322  |
| 2      | 7.157         | BB   | 0.3720      | 9336.24902   | 383.47876    | 98.3678 |

Totals : 9491.16269 391.49568

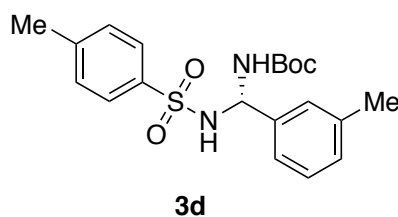

**(*S*)-tert-butyl (4-methylphenylsulfonamido)(*m*-tolylmethyl)carbamate (3d)** The reaction was performed in 0.125mmol scale for 8h using 1 mol% Ca[(*R*)-**PA**]<sub>2</sub> in toluene. The product was obtained by flash chromatography (hexane: acetone = 4:1) as a white solid 24mg, 99% yield, 96% *ee*. M.P.: 149-150 °C. HPLC analysis (Chiralcel AD-H, 1.0 mL/min, 80:20 hexanes/iPrOH): *t*<sub>R</sub>(minor) = 9.91 min, *t*<sub>R</sub>(major) = 12.08 min. [ $\alpha$ ]<sub>D</sub><sup>20</sup> = -1.04 (*c* = 0.230, CHCl<sub>3</sub>). <sup>1</sup>H NMR (600 MHz, Acetone-*d*<sub>6</sub>)  $\delta$  7.82 – 7.74 (m, 2H), 7.39 – 7.33 (m, 2H), 7.20 (td, *J* = 8.2, 5.9 Hz, 3H), 7.15 – 7.06 (m, 2H), 6.63 (d, *J* = 8.0 Hz, 1H), 6.17 (t, *J* = 8.6 Hz, 1H), 2.42 (s, 3H), 2.28 (s, 3H), 1.32 (s, 9H). <sup>13</sup>C NMR (150 MHz, Acetone-*d*<sub>6</sub>)  $\delta$  155.1, 143.6, 141.0, 140.3, 138.7, 130.2, 129.4, 129.2, 128.0, 127.8, 124.1, 79.5, 64.4, 28.5, 21.4, 21.4. HRMS (ESI) Calcd for C<sub>20</sub>H<sub>26</sub>N<sub>2</sub>NaO<sub>4</sub>S ([M+Na]<sup>+</sup>) 413.1505, found 413.1491.

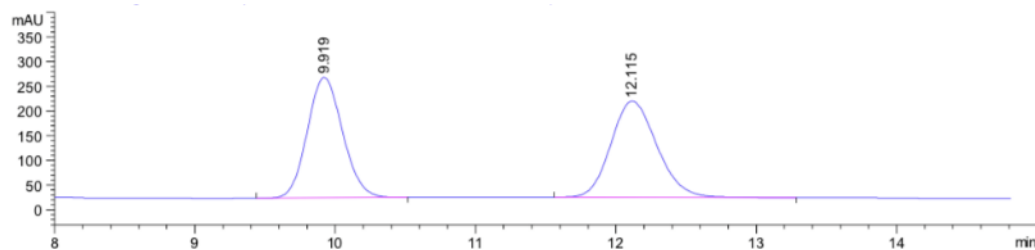

| Peak # | RetTime [min] | Type | Width [min] | Area [mAU*s] | Height [mAU] | Area %  |
|--------|---------------|------|-------------|--------------|--------------|---------|
| 1      | 9.919         | BB   | 0.2724      | 4260.58496   | 243.21579    | 49.0680 |
| 2      | 12.115        | BB   | 0.3537      | 4422.42871   | 194.19868    | 50.9320 |

Totals : 8683.01367 437.41447

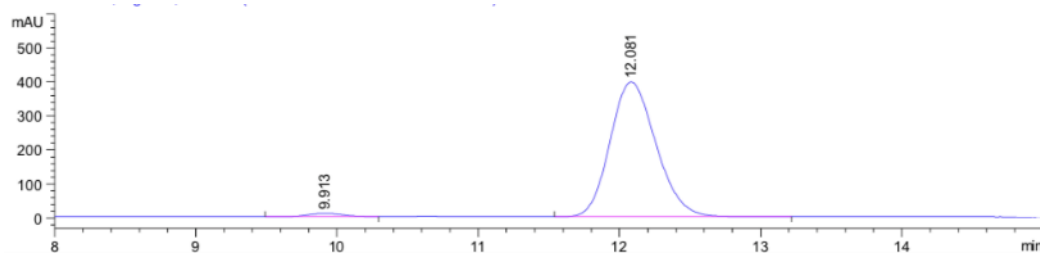

| Peak # | RetTime [min] | Type | Width [min] | Area [mAU*s] | Height [mAU] | Area %  |
|--------|---------------|------|-------------|--------------|--------------|---------|
| 1      | 9.913         | BB   | 0.2648      | 170.68063    | 10.12074     | 1.8691  |
| 2      | 12.081        | BB   | 0.3518      | 8961.11035   | 396.34409    | 98.1309 |

Totals : 9131.79099 406.46482

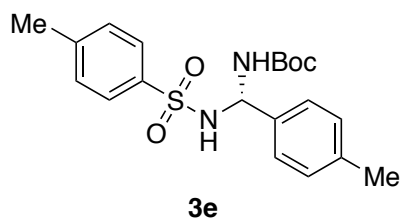

**(*S*)-tert-butyl (4-methylphenylsulfonamido)(*p*-tolylmethyl)carbamate (3e)** The reaction was performed in 0.125mmol scale for 24h using 1 mol% Ca[(*R*)-**PA**]<sub>2</sub> in toluene. The product was obtained by flash chromatography (hexane: acetone = 4:1) as a white solid 24mg, 98% yield, 84% *ee*. M.P.: 153-154 °C. HPLC analysis (Chiralcel OD-H, 1.0 mL/min, 80:20 hexanes/iPrOH): *t*<sub>R</sub>(minor) = 5.30 min, *t*<sub>R</sub>(major) = 8.03 min. [ $\alpha$ ]<sub>D</sub><sup>20</sup> = +1.87 (*c* = 0.160, CHCl<sub>3</sub>). <sup>1</sup>H NMR (600 MHz, Acetone-*d*<sub>6</sub>)  $\delta$  7.82 – 7.75 (m, 2H), 7.39 – 7.32 (m, 2H), 7.27 (d, *J* = 7.8 Hz, 2H), 7.16 – 7.10 (m, 2H), 7.03 (d, *J* = 8.8 Hz, 1H), 6.56 (s, 1H), 6.15 (s, 1H), 2.42 (s, 3H), 2.30 (s, 3H), 1.32 (s, 9H). <sup>13</sup>C NMR (150 MHz, Acetone-*d*<sub>6</sub>)  $\delta$  156.0, 143.6, 140.3, 138.3, 138.2, 130.2, 130.2, 129.8, 128.0, 127.0, 79.5, 64.3, 28.5, 21.4, 21.0. HRMS (ESI) Calcd for C<sub>20</sub>H<sub>26</sub>N<sub>2</sub>NaO<sub>4</sub>S ([M+Na]<sup>+</sup>) 413.1505, found 413.1498.

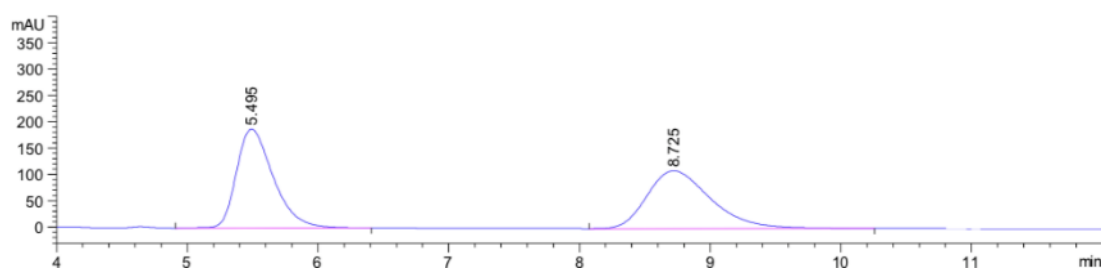

Signal 1: DAD1 A, Sig=220,4 Ref=off

| Peak # | RetTime [min] | Type | Width [min] | Area [mAU*s] | Height [mAU] | Area %  |
|--------|---------------|------|-------------|--------------|--------------|---------|
| 1      | 5.495         | BB   | 0.3011      | 3686.95337   | 187.71642    | 49.8025 |
| 2      | 8.725         | BB   | 0.5214      | 3716.20020   | 109.64300    | 50.1975 |

Totals : 7403.15356 297.35941

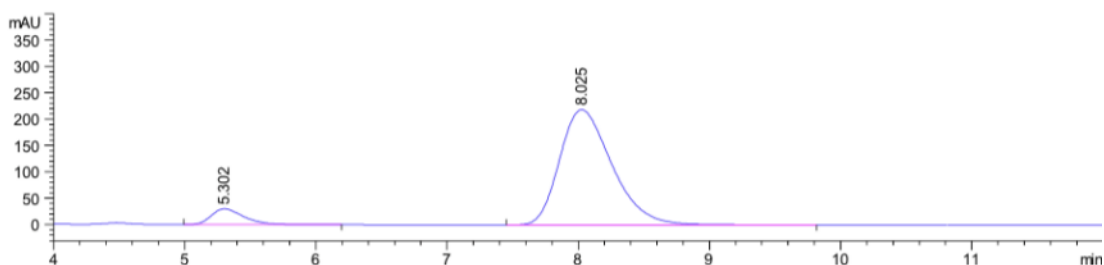



Signal 3: DAD1 C, Sig=220,4 Ref=off

| Peak # | RetTime [min] | Type | Width [min] | Area [mAU*s] | Height [mAU] | Area %  |
|--------|---------------|------|-------------|--------------|--------------|---------|
| 1      | 5.302         | BB   | 0.2618      | 516.46619    | 29.86362     | 7.8401  |
| 2      | 8.025         | BB   | 0.4284      | 6071.01367   | 218.30373    | 92.1599 |

Totals : 6587.47986 248.16734

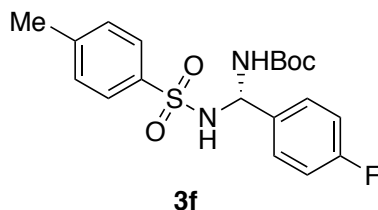

**(S)-tert-butyl (4-fluorophenyl)((4-methylphenylsulfonamidomethyl)carbamate (3f)** The reaction was performed in 0.25mmol scale for 14h using 1 mol% Ca[(*R*)-PA]<sub>2</sub> in toluene. The product was obtained by flash chromatography (hexane: acetone = 4:1) as a white solid 49mg, 99% yield, 99% *ee*. M.P.: 157-158 °C. HPLC analysis (Chiralcel OD-H, 1.0 mL/min, 90:10 hexanes/*i*PrOH): *t*<sub>R</sub>(minor) = 8.22 min, *t*<sub>R</sub>(major) = 9.88 min. [ $\alpha$ ]<sub>D</sub><sup>20</sup> = +3.26 (*c* = 0.245, CHCl<sub>3</sub>). <sup>1</sup>H NMR (600 MHz, Acetone-*d*<sub>6</sub>)  $\delta$  7.81 – 7.76 (m, 2H), 7.44 (dd, *J* = 8.6, 5.4 Hz, 2H), 7.36 (d, *J* = 8.0 Hz, 2H), 7.19 (d, *J* = 8.9 Hz, 1H), 6.72 (d, *J* = 8.7 Hz, 1H), 6.18 (t, *J* = 9.1 Hz, 1H), 2.42 (s, 3H), 1.32 (s, 9H). <sup>13</sup>C NMR (150 MHz, Acetone-*d*<sub>6</sub>)  $\delta$  164.0, 162.4, 155.2, 143.7, 140.2, 137.3, 130.3, 129.2, 129.2, 128.0, 115.9, 115.8, 79.7, 63.9, 28.5, 21.4. HRMS (ESI) Calcd for C<sub>19</sub>H<sub>23</sub>FN<sub>2</sub>NaO<sub>4</sub>S ([M+Na]<sup>+</sup>) 417.1255, found 417.1264.

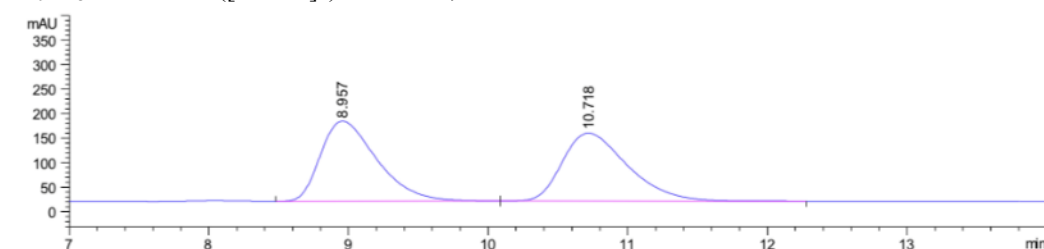

Signal 2: DAD1 B, Sig=220,4 Ref=off

| Peak # | RetTime [min] | Type | Width [min] | Area [mAU*s] | Height [mAU] | Area %  |
|--------|---------------|------|-------------|--------------|--------------|---------|
| 1      | 8.957         | VB   | 0.4317      | 4579.30029   | 163.01512    | 50.4331 |
| 2      | 10.718        | BB   | 0.4997      | 4500.65869   | 138.28102    | 49.5669 |

Totals : 9079.95898 301.29614

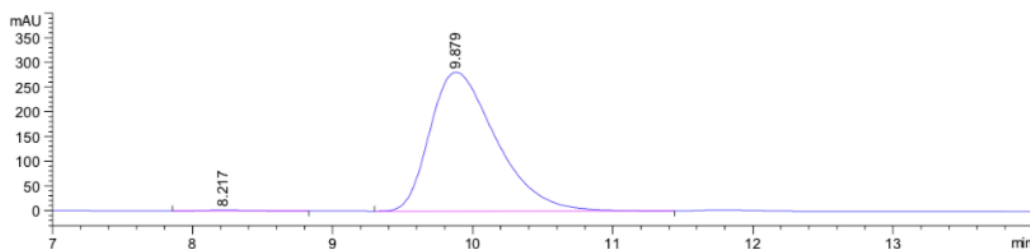

Signal 2: DAD1 B, Sig=220,4 Ref=off

| Peak # | RetTime [min] | Type | Width [min] | Area [mAU*s] | Height [mAU] | Area %  |
|--------|---------------|------|-------------|--------------|--------------|---------|
| 1      | 8.217         | BB   | 0.3711      | 46.64305     | 1.85631      | 0.5031  |
| 2      | 9.879         | BB   | 0.5050      | 9224.91309   | 280.98706    | 99.4969 |

Totals : 9271.55614 282.84337

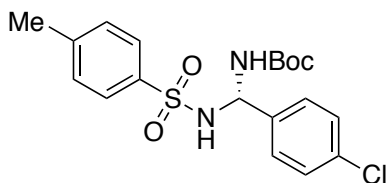

**3g**

**(S)-tert-butyl (4-chlorophenyl)(4-methylphenylsulfonamidomethyl)carbamate (3g)** The reaction was performed in 0.25mmol scale for 16h using 1 mol% Ca[(R)-PA]<sub>2</sub> in ether. The product was obtained by flash chromatography (hexane: acetone = 4:1) as a white solid 48mg, 94% yield, 91% *ee*. HPLC analysis (Chiralcel OD-H, 1.0 mL/min, 90:10 hexanes/iPrOH): *t<sub>R</sub>*(minor) = 8.61 min, *t<sub>R</sub>*(major) = 13.23 min.  $[\alpha]_D^{20} = -10.1$  (*c* = 0.295, CHCl<sub>3</sub>). <sup>1</sup>H NMR (600 MHz, Acetone-*d*<sub>6</sub>) δ 7.80 – 7.75 (m, 2H), 7.42 (d, *J* = 8.4 Hz, 2H), 7.37 (dt, *J* = 8.4, 2.5 Hz, 4H), 7.28 – 7.19 (m, 1H), 6.77 (d, *J* = 8.8 Hz, 1H), 6.18 (t, *J* = 9.0 Hz, 1H), 2.42 (s, 3H), 1.31 (s, 9H). <sup>13</sup>C NMR (150 MHz, Acetone-*d*<sub>6</sub>) δ 155.2, 143.8, 140.1, 140.0, 134.1, 130.3, 129.3, 129.0, 128.0, 79.8, 63.9, 28.5, 21.5. HRMS (ESI) Calcd for C<sub>19</sub>H<sub>23</sub>ClN<sub>2</sub>NaO<sub>4</sub>S ([M+Na]<sup>+</sup>) 433.0959, found 433.0969.

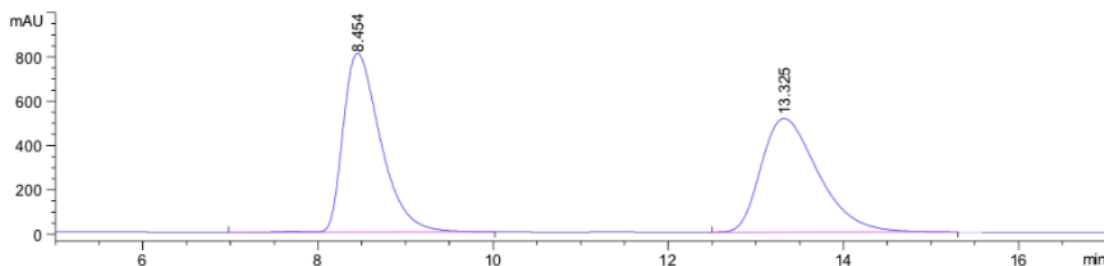

Signal 2: DAD1 B, Sig=220,4 Ref=off

| Peak # | RetTime [min] | Type | Width [min] | Area [mAU*s] | Height [mAU] | Area %  |
|--------|---------------|------|-------------|--------------|--------------|---------|
| 1      | 8.454         | VB R | 0.4582      | 2.40511e4    | 807.17743    | 50.9172 |
| 2      | 13.325        | BB   | 0.7000      | 2.31846e4    | 512.29926    | 49.0828 |

Totals : 4.72357e4 1319.47668

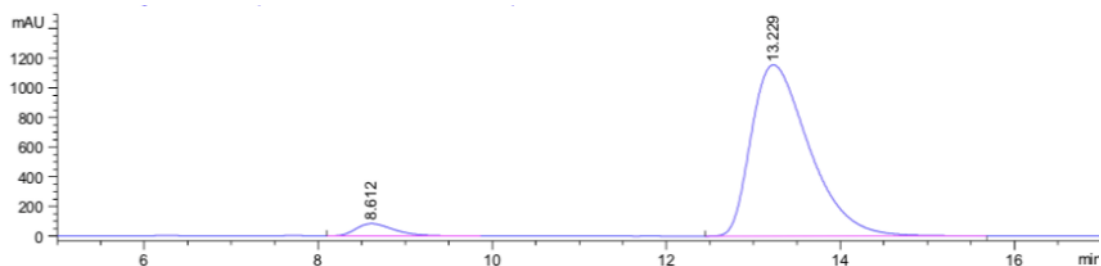

Signal 2: DAD1 B, Sig=220,4 Ref=off

| Peak # | RetTime [min] | Type | Width [min] | Area [mAU*s] | Height [mAU] | Area %  |
|--------|---------------|------|-------------|--------------|--------------|---------|
| 1      | 8.612         | BB   | 0.4711      | 2533.95703   | 82.77647     | 4.5252  |
| 2      | 13.229        | BB   | 0.7172      | 5.34627e4    | 1156.72327   | 95.4748 |

Totals : 5.59967e4 1239.49973

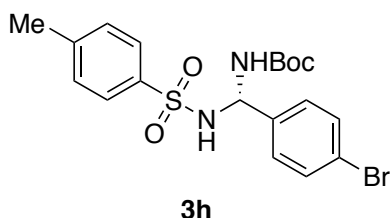

**(S)-tert-butyl (4-bromophenyl)(4-methylphenylsulfonamidomethyl)carbamate (3h)** The reaction was performed in 0.25 mmol scale for 24 h using 1 mol% Ca[(R)-PA]<sub>2</sub> in toluene. The product was obtained by flash chromatography (hexane: acetone = 4:1) as a white solid 55 mg, 96% yield, >99% ee. HPLC analysis (Chiralcel OD-H, 1.0 mL/min, 90:10 hexanes/iPrOH): t<sub>R</sub>(minor) = 9.20 min, t<sub>R</sub>(major) = 18.25 min. [α]<sub>D</sub><sup>20</sup> = +0.55 (c = 0.290, CHCl<sub>3</sub>). <sup>1</sup>H NMR (600 MHz, Acetone-*d*<sub>6</sub>) δ 7.82 – 7.71 (m, 2H), 7.56 – 7.49 (m, 2H), 7.36 (dd, *J* = 8.4, 3.6 Hz, 4H), 7.25 (d, *J* = 8.9 Hz, 1H), 6.77 (d, *J* = 7.9 Hz, 1H), 6.15 (t, *J* = 9.0 Hz, 1H), 2.43 (s, 3H), 1.32 (s, 9H). <sup>13</sup>C NMR (150 MHz, Acetone-*d*<sub>6</sub>) δ 155.2, 143.8, 140.5, 140.1, 132.2, 130.3, 129.3, 128.0, 122.3, 79.8, 64.0, 28.5, 21.4. HRMS (ESI) Calcd for C<sub>19</sub>H<sub>23</sub>BrN<sub>2</sub>NaO<sub>4</sub>S ([M+Na]<sup>+</sup>) 477.0454, found 477.0459.

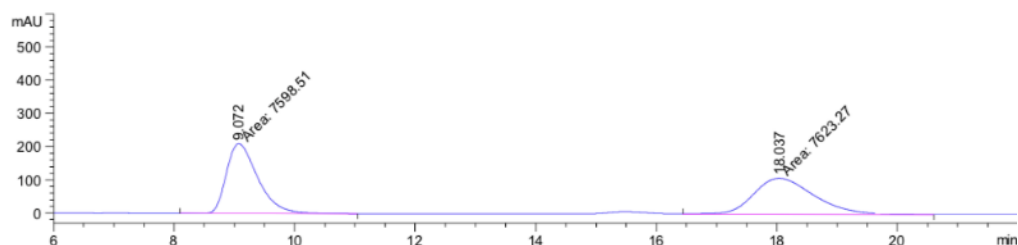

Signal 1: DAD1 A, Sig=220,4 Ref=off

| Peak # | RetTime [min] | Type | Width [min] | Area [mAU*s] | Height [mAU] | Area %  |
|--------|---------------|------|-------------|--------------|--------------|---------|
| 1      | 9.072         | MM   | 0.6049      | 7598.51416   | 209.35927    | 49.9187 |
| 2      | 18.037        | MM   | 1.1684      | 7623.27246   | 108.73913    | 50.0813 |

Totals : 1.52218e4 318.09840

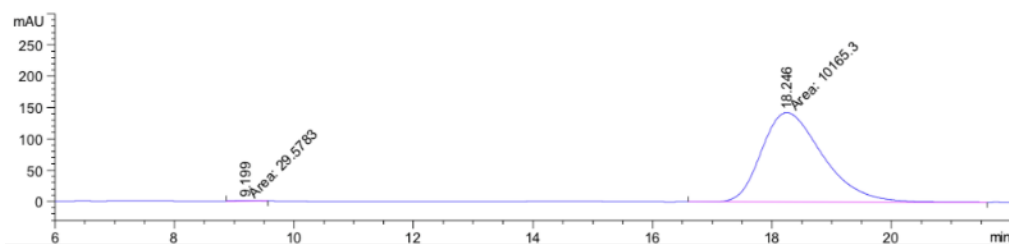

Signal 1: DAD1 A, Sig=220,4 Ref=off

| Peak # | RetTime [min] | Type | Width [min] | Area [mAU*s] | Height [mAU] | Area %  |
|--------|---------------|------|-------------|--------------|--------------|---------|
| 1      | 9.199         | MM   | 0.4027      | 29.57825     | 1.22414      | 0.2901  |
| 2      | 18.246        | MM   | 1.1876      | 1.01653e4    | 142.65549    | 99.7099 |

Totals : 1.01949e4 143.87962

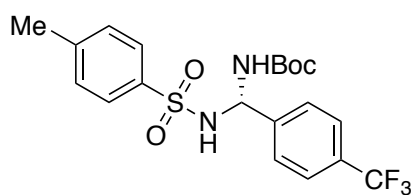

**3i**

**(*S*)-tert-butyl (4-methylphenylsulfonamido)(4-trifluoromethylphenylmethyl)carbamate (3i)**

The reaction was performed in 0.25 mmol scale for 20 h using 1 mol% Ca[(*R*)-**PA**]<sub>2</sub> in toluene. The product was obtained by flash chromatography (hexane: acetone = 4:1) as a white solid 55 mg, 99% yield, 99% *ee*. HPLC analysis (Chiralcel OD-H, 1.0 mL/min, 90:10 hexanes/*i*PrOH): *t*<sub>R</sub>(minor) = 6.79 min, *t*<sub>R</sub>(major) = 10.51 min.  $[\alpha]_D^{20} = -13.75$  (*c* = 0.305, CHCl<sub>3</sub>). <sup>1</sup>H NMR (600 MHz, Acetone-*d*<sub>6</sub>) δ 7.78 (d, *J* = 8.0 Hz, 2H), 7.70 (d, *J* = 8.2 Hz, 2H), 7.64 (d, *J* = 8.2 Hz, 2H), 7.37 (d, *J* = 8.2 Hz, 3H), 6.90 (d, *J* = 9.0 Hz, 1H), 6.26 (t, *J* = 9.2 Hz, 1H), 2.42 (s, 3H), 1.32 (s, 9H). <sup>13</sup>C NMR (150 MHz, Acetone-*d*<sub>6</sub>) δ 155.2, 145.5, 143.8, 140.1, 130.5, 130.3, 130.2, 128.0, 128.0, 126.2 (q, *J* = 3.7 Hz), 79.8, 64.0, 28.5, 21.4. HRMS (ESI) Calcd for C<sub>20</sub>H<sub>23</sub>F<sub>3</sub>N<sub>2</sub>NaO<sub>4</sub>S ([M+Na]<sup>+</sup>) 467.1223, found 467.1229.

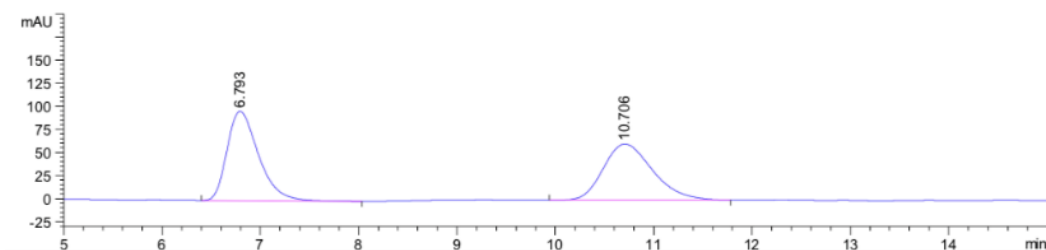

Signal 2: DAD1 B, Sig=220,4 Ref=off

| Peak # | RetTime [min] | Type | Width [min] | Area [mAU*s] | Height [mAU] | Area %  |
|--------|---------------|------|-------------|--------------|--------------|---------|
| 1      | 6.793         | BB   | 0.3418      | 2153.20850   | 96.70289     | 50.4196 |
| 2      | 10.706        | BB   | 0.5390      | 2117.37256   | 60.69666     | 49.5804 |

Totals : 4270.58105 157.39955

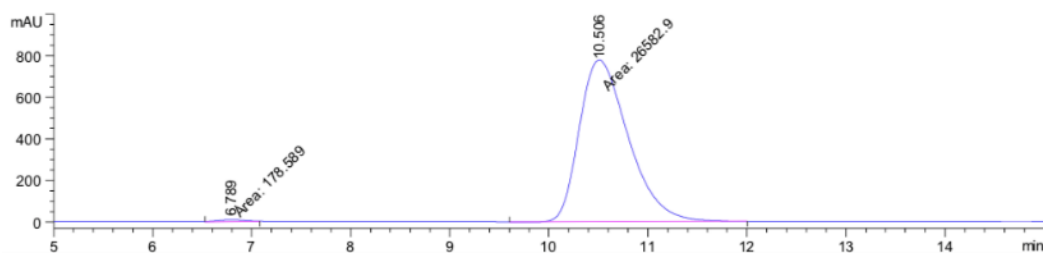

Signal 2: DAD1 B, Sig=220,4 Ref=off

| Peak # | RetTime [min] | Type | Width [min] | Area [mAU*s] | Height [mAU] | Area %  |
|--------|---------------|------|-------------|--------------|--------------|---------|
| 1      | 6.789         | MM   | 0.3235      | 178.58879    | 9.19974      | 0.6673  |
| 2      | 10.506        | MM   | 0.5712      | 2.65829e4    | 775.58008    | 99.3327 |

Totals : 2.67615e4 784.77982

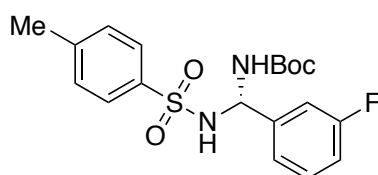

**3j**

**(S)-tert-butyl ((3-fluorophenyl)(4-methylphenyl)sulfonamidomethyl)carbamate (3j)** The reaction was performed in 0.125 mmol scale for 18 h using 5 mol%  $\text{Ca}[(R)\text{-PA}]_2$  in toluene. The product was obtained by flash chromatography (hexane: acetone = 4:1) as a white solid 23 mg, 94% yield, 85% *ee*. M.P.: 150–151 °C. HPLC analysis (Chiralcel OJ-H, 1.0 mL/min, 90:10 hexanes/iPrOH):  $t_R$ (minor) = 12.03 min,  $t_R$ (major) = 16.39 min.  $[\alpha]_D^{20} = -8.09$  ( $c = 0.220$ ,  $\text{CHCl}_3$ ).  $^1\text{H}$  NMR (600 MHz, Acetone- $d_6$ )  $\delta$  7.79 (d, 2H), 7.42 – 7.35 (m, 3H), 7.25 (dd,  $J = 17.8, 8.4$  Hz, 2H), 7.18 (dt,  $J = 10.4, 2.2$  Hz, 1H), 7.06 (tdd,  $J = 8.5, 2.7, 0.8$  Hz, 1H), 6.78 (s, 1H), 6.21 (t,  $J = 8.9$  Hz, 1H), 2.42 (s, 3H), 1.32 (s, 9H).  $^{13}\text{C}$  NMR (150 MHz, Acetone- $d_6$ )  $\delta$  163.64 (d,  $J = 244.0$  Hz), 155.17, 143.99 (d,  $J = 6.9$  Hz), 143.79, 140.13, 131.17 (d,  $J = 8.2$  Hz), 130.3, 128.0, 123.2, 115.5 (d,  $J = 21.2$  Hz), 114.0 (d,  $J = 23.1$  Hz), 79.8, 63.9, 28.5, 21.4. HRMS (ESI) Calcd for  $\text{C}_{19}\text{H}_{23}\text{FN}_2\text{NaO}_4\text{S}$  ( $[\text{M}+\text{Na}]^+$ ) 417.1255, found 417.1273.

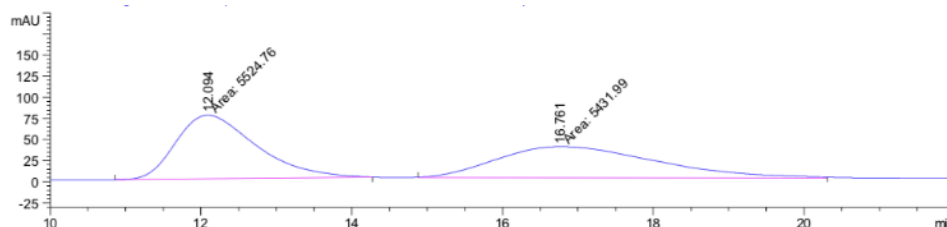

Signal 3: DAD1 C, Sig=220,4 Ref=off

| Peak # | RetTime [min] | Type | Width [min] | Area [mAU*s] | Height [mAU] | Area %  |
|--------|---------------|------|-------------|--------------|--------------|---------|
| 1      | 12.094        | MM   | 1.2262      | 5524.76221   | 75.09027     | 50.4234 |
| 2      | 16.761        | MF   | 2.4482      | 5431.98975   | 36.97984     | 49.5766 |

Totals : 1.09568e4 112.07011

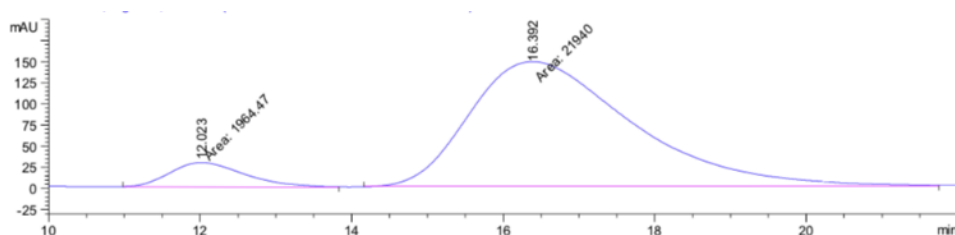

Signal 3: DAD1 C, Sig=220,4 Ref=off

| Peak # | RetTime [min] | Type | Width [min] | Area [mAU*s] | Height [mAU] | Area %  |
|--------|---------------|------|-------------|--------------|--------------|---------|
| 1      | 12.023        | MM   | 1.1414      | 1964.47131   | 28.68607     | 8.2180  |
| 2      | 16.392        | MM   | 2.4833      | 2.19400e4    | 147.24892    | 91.7820 |

Totals : 2.39044e4 175.93498

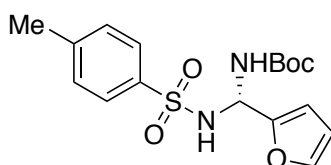

**3k**

**(*S*)-tert-butyl (furan-2-yl)(4-methylphenyl)sulfonamidomethyl)carbamate (3k)** The reaction was performed in 0.125mmol scale for 24h using 1 mol% Ca[(*R*)-**PA**]<sub>2</sub> in toluene. The product was obtained by flash chromatography (hexane: acetone = 4:1) as a white solid 22mg, 99% yield, 99% *ee*. M.P.: 152-153 °C. HPLC analysis (Chiralcel IA-H, 1.0 mL/min, 90:10 hexanes/*i*PrOH): *t*<sub>R</sub>(minor) = 25.80 min, *t*<sub>R</sub>(major) = 31.20min. [ $\alpha$ ]<sub>D</sub><sup>20</sup> = -3.125 (*c* = 0.160, CHCl<sub>3</sub>). <sup>1</sup>H NMR (600 MHz, Acetone-*d*<sub>6</sub>)  $\delta$  7.78 (td, 2H), 7.45 (t, *J* = 1.4 Hz, 1H), 7.35 (d, *J* = 8.0 Hz, 2H), 7.30 (d, *J* = 9.0 Hz, 1H), 6.75 – 6.66 (m, 1H), 6.39 – 6.32 (m, 2H), 6.25 (t, *J* = 8.8 Hz, 1H), 2.41 (s, 3H), 1.32 (s, 9H). <sup>13</sup>C NMR (150 MHz, Acetone-*d*<sub>6</sub>)  $\delta$  153.0, 143.6, 143.5, 140.4, 130.2, 127.9, 111.2, 107.9, 79.8, 59.5, 28.5, 21.4. HRMS (ESI) Calcd for C<sub>17</sub>H<sub>22</sub>N<sub>2</sub>NaO<sub>5</sub>S ([M+Na]<sup>+</sup>) 389.1142, found 389.1150.

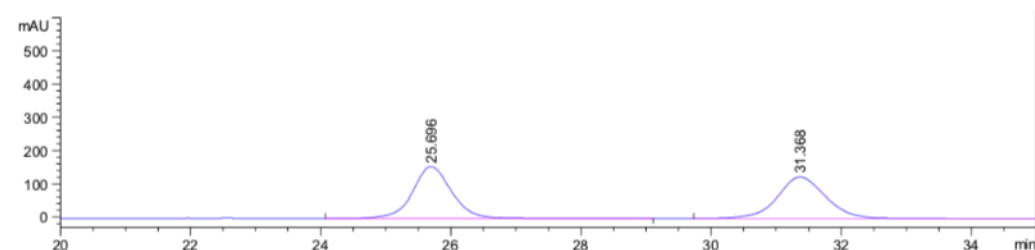

Signal 2: DAD1 B, Sig=220,4 Ref=off

| Peak # | RetTime [min] | Type | Width [min] | Area [mAU*s] | Height [mAU] | Area %  |
|--------|---------------|------|-------------|--------------|--------------|---------|
| 1      | 25.696        | BV R | 0.6411      | 6633.16406   | 156.19527    | 50.3333 |
| 2      | 31.368        | BV R | 0.7833      | 6545.30566   | 124.76031    | 49.6667 |

Totals : 1.31785e4 280.95557

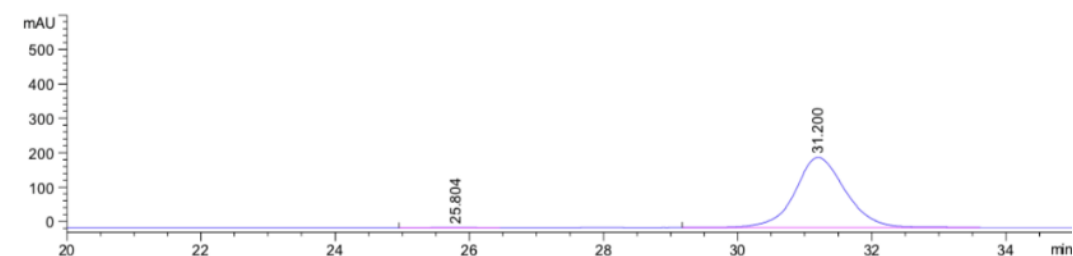

Signal 2: DAD1 B, Sig=220,4 Ref=off

| Peak # | RetTime [min] | Type | Width [min] | Area [mAU*s] | Height [mAU] | Area %  |
|--------|---------------|------|-------------|--------------|--------------|---------|
| 1      | 25.804        | BB   | 0.5397      | 53.28258     | 1.40096      | 0.4940  |
| 2      | 31.200        | BB   | 0.7978      | 1.07319e4    | 203.98979    | 99.5060 |

Totals : 1.07852e4 205.39075

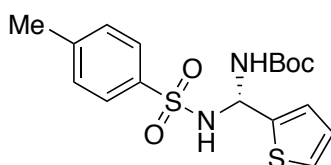

**3I**

**(*S*)-tert-butyl (4-methylphenylsulfonamido)(thiophen-2-yl)methylcarbamate (3I)** The reaction was performed in 0.25mmol scale for 12h using 5 mol% Ca[(*R*)-**PA**]<sub>2</sub> in toluene. The product was obtained by flash chromatography (hexane: acetone = 4:1) as a white solid 23mg, 99% yield, >99% *ee*. HPLC analysis (Chiralcel OD-H, 1.0 mL/min, 90:10 hexanes/*i*PrOH): *t<sub>R</sub>*(minor) = 8.45 min, *t<sub>R</sub>*(major) = 12.60 min.  $[\alpha]_D^{20} = -14.93$  (*c* = 0.365, CHCl<sub>3</sub>). <sup>1</sup>H NMR (600 MHz, Acetone-*d*<sub>6</sub>)  $\delta$  7.82 – 7.78 (m, 2H), 7.40 – 7.34 (m, 3H), 7.29 (d, *J* = 9.2 Hz, 1H), 7.02 (dt, *J* = 3.6, 1.3 Hz, 1H), 6.96 (dd, *J* = 5.1, 3.6 Hz, 1H), 6.73 (s, 1H), 6.38 (t, *J* = 9.4 Hz, 1H), 2.42 (s, 3H), 1.33 (s, 9H). <sup>13</sup>C NMR (150 MHz, Acetone-*d*<sub>6</sub>)  $\delta$  155.0, 145.6, 143.8, 140.2, 130.3, 128.0, 127.8, 126.5, 125.7, 79.9, 61.5, 28.5, 21.4. HRMS (ESI) Calcd for C<sub>17</sub>H<sub>22</sub>N<sub>2</sub>NaO<sub>4</sub>S<sub>2</sub> ([M+Na]<sup>+</sup>) 405.0913, found 405.0905.

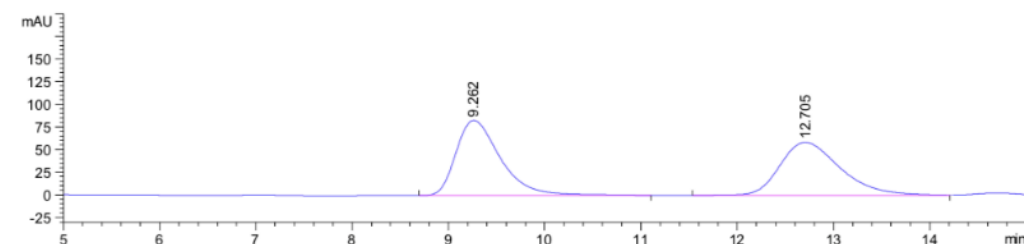

Signal 2: DAD1 B, Sig=220,4 Ref=360,100

| Peak # | RetTime [min] | Type | Width [min] | Area [mAU*s] | Height [mAU] | Area %  |
|--------|---------------|------|-------------|--------------|--------------|---------|
| 1      | 9.262         | BB   | 0.4907      | 2661.11914   | 82.86712     | 51.1067 |
| 2      | 12.705        | BB   | 0.6680      | 2545.86499   | 58.46561     | 48.8933 |

Totals : 5206.98413 141.33273

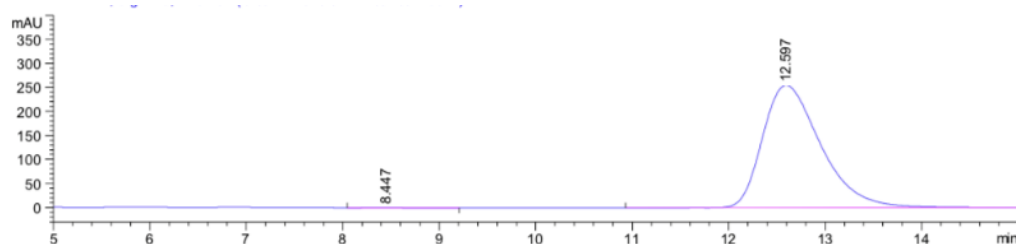

Signal 2: DAD1 B, Sig=220,4 Ref=off

| Peak # | RetTime [min] | Type | Width [min] | Area [mAU*s] | Height [mAU] | Area %  |
|--------|---------------|------|-------------|--------------|--------------|---------|
| 1      | 8.447         | BB   | 0.3584      | 15.47902     | 6.39457e-1   | 0.1440  |
| 2      | 12.597        | BB   | 0.6472      | 1.07368e4    | 255.01836    | 99.8560 |

Totals : 1.07523e4 255.65781

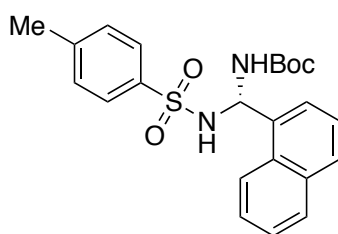

**3m**

**(S)-tert-butyl (4-methylphenylsulfonamido)(naphthalen-1-yl)methylcarbamate (3m)** The reaction was performed in 0.125 mmol scale for 10 h using 5 mol%  $\text{Ca}[(R)\text{-PA}]_2$  in toluene. The product was obtained by flash chromatography (hexane: acetone = 4:1) as a white solid 26 mg, 98% yield, >99% *ee*. M.P.: 158–159 °C. HPLC analysis (Chiralcel IA-H, 1.0 mL/min, 90:10 hexanes/*i*PrOH):  $t_R$ (minor) = 34.51 min,  $t_R$ (major) = 38.63 min.  $[\alpha]_D^{20} = +4.04$  ( $c = 0.425$ ,  $\text{CHCl}_3$ ).  $^1\text{H}$  NMR (600 MHz, Acetone- $d_6$ )  $\delta$  8.17–8.10 (m, 1H), 7.94–7.88 (m, 1H), 7.85 (d,  $J = 8.2$  Hz, 1H), 7.81 (d,  $J = 7.8$  Hz, 2H), 7.73 (d,  $J = 7.2$  Hz, 1H), 7.56–7.48 (m, 2H), 7.44 (t,  $J = 7.7$  Hz, 1H), 7.35 (d,  $J = 7.9$  Hz, 2H), 7.26 (d,  $J = 8.1$  Hz, 1H), 6.99 (t,  $J = 8.7$  Hz, 1H), 6.84–6.73 (m, 1H), 2.43 (s, 3H), 1.34 (s, 9H).  $^{13}\text{C}$  NMR (150 MHz, Acetone- $d_6$ )  $\delta$  155.1, 143.7, 140.2, 136.3, 134.8, 131.2, 130.2, 129.7, 129.5, 128.1, 127.3, 126.7, 125.9, 124.6, 124.1, 78.0, 61.6, 28.5, 21.4. HRMS (ESI) Calcd for  $\text{C}_{23}\text{H}_{26}\text{N}_2\text{NaO}_4\text{S}$  ( $[\text{M}+\text{Na}]^+$ ) 449.1505, found 449.1504.

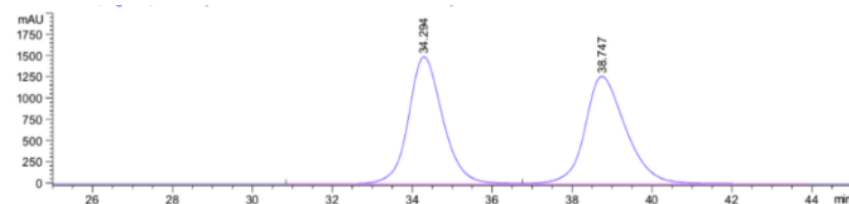



Signal 2: DAD1 B, Sig=220,4 Ref=off

| Peak # | RetTime [min] | Type | Width [min] | Area [mAU*s] | Height [mAU] | Area %  |
|--------|---------------|------|-------------|--------------|--------------|---------|
| 1      | 34.294        | VR   | 0.9127      | 8.93004e4    | 1494.62781   | 49.8191 |
| 2      | 38.747        | VB   | 1.0705      | 8.99490e4    | 1263.63098   | 50.1809 |

Totals : 1.79249e5 2758.25879

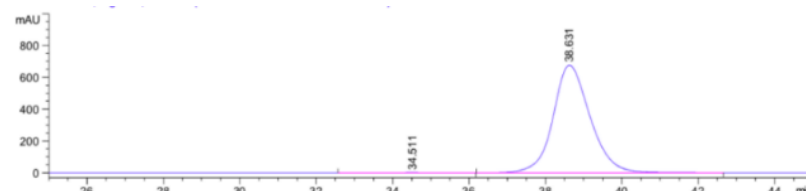

Signal 2: DAD1 B, Sig=220,4 Ref=off

| Peak # | RetTime [min] | Type | Width [min] | Area [mAU*s] | Height [mAU] | Area %  |
|--------|---------------|------|-------------|--------------|--------------|---------|
| 1      | 34.511        | VB   | 1.2885      | 150.05591    | 1.57360      | 0.3272  |
| 2      | 38.631        | BB   | 1.0206      | 4.57118e4    | 676.25269    | 99.6728 |

Totals : 4.58618e4 677.82629

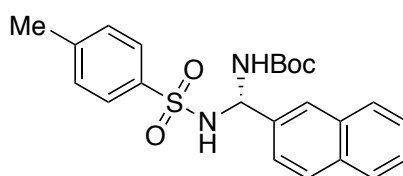

### 3n

**(S)-tert-butyl (4-methylphenylsulfonamido)(naphthalen-2-yl)methylcarbamate (3n)** The reaction was performed in 0.125 mmol scale for 17 h using 1 mol% Ca[(R)-PA]<sub>2</sub> in toluene. The product was obtained by flash chromatography (hexane: acetone = 4:1) as a white solid 24 mg, 90% yield, >99% *ee*. M.P.: 151–152 °C. HPLC analysis (Chiralcel IA-H, 1.0 mL/min, 90:10 hexanes/iPrOH): *t<sub>R</sub>*(major) = 20.07 min, *t<sub>R</sub>*(minor) = 30.93 min. [ $\alpha$ ]<sub>D</sub><sup>20</sup> = +10.55 (*c* = 0.280, CHCl<sub>3</sub>). <sup>1</sup>H NMR (600 MHz, Acetone-*d*<sub>6</sub>)  $\delta$  7.90–7.84 (m, 4H), 7.83–7.79 (m, 2H), 7.55–7.48 (m, 3H), 7.36–7.31 (m, 2H), 7.23 (d, *J* = 8.8 Hz, 1H), 6.76 (s, 1H), 6.36 (s, 1H), 2.40 (s, 3H), 1.34 (s, 9H). <sup>13</sup>C NMR (150 MHz, Acetone-*d*<sub>6</sub>)  $\delta$  155.2, 143.7, 140.3, 138.4, 134.0, 134.0, 130.3, 129.1, 129.0, 128.4, 128.0, 127.2, 127.1, 125.8, 125.4, 79.7, 64.7, 28.5, 21.4. HRMS (ESI) Calcd for C<sub>23</sub>H<sub>26</sub>N<sub>2</sub>NaO<sub>4</sub>S ([M+Na]<sup>+</sup>) 449.1505, found 449.1517.

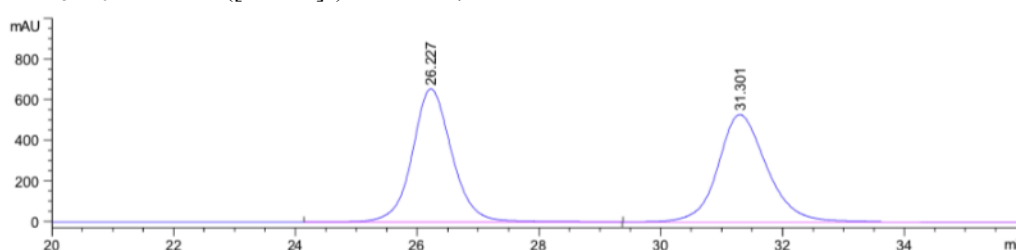

Signal 2: DAD1 B, Sig=220,4 Ref=off

| Peak # | RetTime [min] | Type | Width [min] | Area [mAU*s] | Height [mAU] | Area %  |
|--------|---------------|------|-------------|--------------|--------------|---------|
| 1      | 26.227        | BB   | 0.6861      | 2.95211e4    | 654.63531    | 50.0284 |
| 2      | 31.301        | BB   | 0.8438      | 2.94877e4    | 527.80292    | 49.9716 |

Totals : 5.90088e4 1182.43823

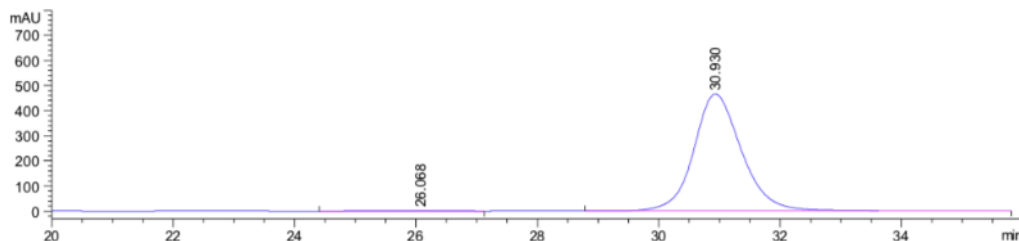

Signal 2: DAD1 B, Sig=220,4 Ref=off

| Peak # | RetTime [min] | Type | Width [min] | Area [mAU*s] | Height [mAU] | Area %  |
|--------|---------------|------|-------------|--------------|--------------|---------|
| 1      | 26.068        | BB   | 0.8755      | 39.58795     | 6.41957e-1   | 0.1537  |
| 2      | 30.930        | BB   | 0.8360      | 2.57163e4    | 465.91098    | 99.8463 |

Totals : 2.57559e4 466.55294

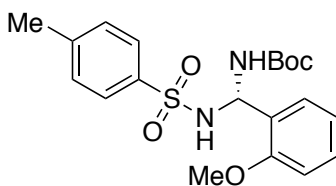

**30**

**(S)-tert-butyl (2-methoxyphenyl)(4-methylphenylsulfonamidomethyl)carbamate (30)** The reaction was performed in 0.125 mmol scale for 36 h using 5 mol% Ca[(R)-PA]<sub>2</sub> in toluene. The product was obtained by flash chromatography (hexane: acetone = 4:1) as a white solid 20 mg, 79% yield, 67% *ee*. M.P.: 169–170 °C. HPLC analysis (Chiralcel OD-H, 1.0 mL/min, 90:10 hexanes/iPrOH): *t*<sub>R</sub>(minor) = 11.04 min, *t*<sub>R</sub>(major) = 18.36 min. [α]<sub>D</sub><sup>20</sup> = -24.23 (*c* = 0.085, CHCl<sub>3</sub>). <sup>1</sup>H NMR (600 MHz, Acetone-*d*<sub>6</sub>) δ 7.72 (d, *J* = 7.9 Hz, 2H), 7.30 (d, *J* = 7.9 Hz, 3H), 7.24 (td, *J* = 7.8, 1.7 Hz, 1H), 6.95 (d, *J* = 8.0 Hz, 1H), 6.92–6.83 (m, 2H), 6.49–6.40 (m, 1H), 6.27 (t, *J* = 8.9 Hz, 1H), 3.74 (s, 3H), 2.40 (s, 3H), 1.33 (s, 9H). <sup>13</sup>C NMR (150 MHz, Acetone-*d*<sub>6</sub>) δ 157.3, 154.8, 143.3, 140.2, 130.3, 130.0, 128.6, 128.5, 128.0, 121.2, 111.8, 79.5, 62.6, 55.7, 28.5, 21.4. HRMS (ESI) Calcd for C<sub>20</sub>H<sub>26</sub>N<sub>2</sub>NaO<sub>5</sub>S ([M+Na]<sup>+</sup>) 429.1455, found 429.1444.

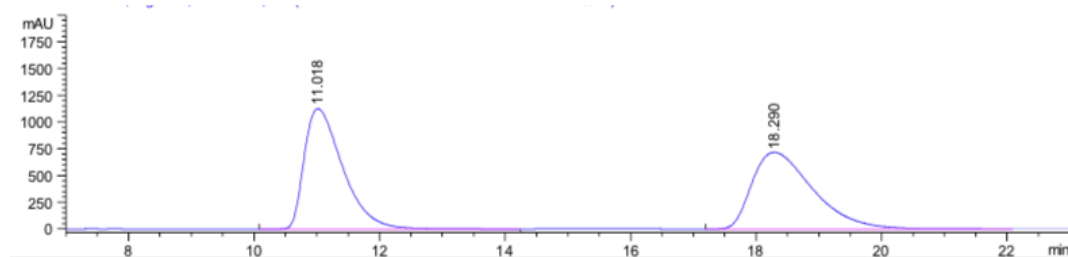

Signal 3: DAD1 C, Sig=220,4 Ref=360,100

| Peak # | RetTime [min] | Type | Width [min] | Area [mAU*s] | Height [mAU] | Area %  |
|--------|---------------|------|-------------|--------------|--------------|---------|
| 1      | 11.018        | BB   | 0.6596      | 4.80020e4    | 1125.43579   | 49.7417 |
| 2      | 18.290        | BB   | 1.0482      | 4.85005e4    | 717.84839    | 50.2583 |

Totals : 9.65026e4 1843.28418

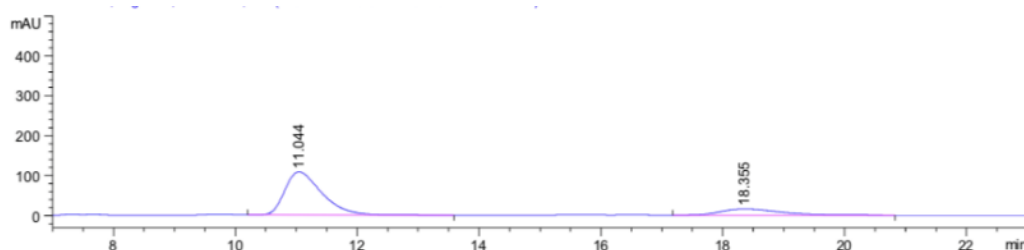

Signal 3: DAD1 C, Sig=220,4 Ref=360,100

| Peak # | RetTime [min] | Type | Width [min] | Area [mAU*s] | Height [mAU] | Area %  |
|--------|---------------|------|-------------|--------------|--------------|---------|
| 1      | 11.044        | BB   | 0.6423      | 4575.87939   | 107.99270    | 81.3938 |
| 2      | 18.355        | BB   | 0.9498      | 1046.02246   | 15.56971     | 18.6062 |

Totals : 5621.90186 123.56240

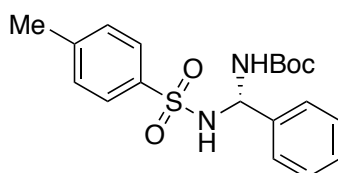

**3p**

**(S)-tert-butyl (4-methylphenylsulfonamido)(phenyl)methylcarbamate (3p)** The reaction was performed in 0.25mmol scale for 3h using 1 mol%  $\text{Ca}[(R)\text{-PA}]_2$  in ether. The product was obtained by flash chromatography (hexane: acetone = 4:1) as a white solid 47mg, 99% yield, >99% *ee*. M.P.: 170-171 °C. HPLC analysis (Chiralcel OD-H, 1.0 mL/min, 90:10 hexanes/iPrOH):  $t_R(\text{minor}) = 9.24$  min,  $t_R(\text{major}) = 10.90$  min.  $[\alpha]_D^{20} = -6.69$  ( $c = 0.260$ ,  $\text{CHCl}_3$ ).  $^1\text{H}$  NMR (600 MHz, Acetone- $d_6$ )  $\delta$  7.80 (d,  $J = 7.9$  Hz, 2H), 7.43 – 7.27 (m, 8H), 7.17 (d,  $J = 8.9$  Hz, 1H), 6.70 (s, 1H), 6.22 (t,  $J = 9.1$  Hz, 1H), 2.43 (s, 3H), 1.32 (s, 9H).  $^{13}\text{C}$  NMR (150 MHz, Acetone- $d_6$ )  $\delta$  155.2, 143.7, 141.1, 140.3, 130.3, 129.2, 128.7, 128.0, 127.1, 79.6, 64.4, 28.5, 21.4. HRMS (ESI) Calcd for  $\text{C}_{19}\text{H}_{24}\text{N}_2\text{NaO}_4\text{S}$  ( $[\text{M}+\text{Na}]^+$ ) 399.1349, found 399.1360.

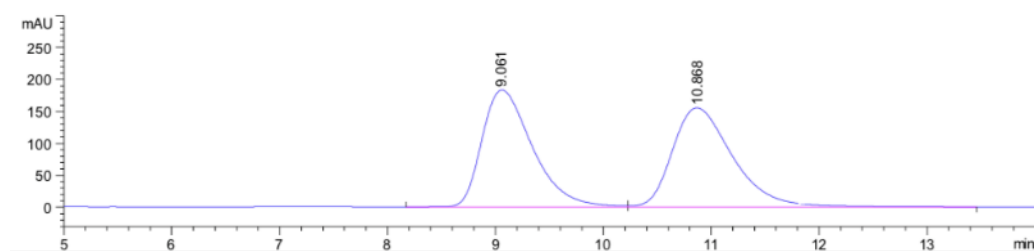

Signal 3: DAD1 D, Sig=220,4 Ref=360,100

| Peak # | RetTime [min] | Type | Width [min] | Area [mAU*s] | Height [mAU] | Area %  |
|--------|---------------|------|-------------|--------------|--------------|---------|
| 1      | 9.061         | BV   | 0.4997      | 5957.33887   | 183.06398    | 49.7110 |
| 2      | 10.868        | VB   | 0.5952      | 6026.60498   | 155.13988    | 50.2890 |

Totals : 1.19839e4 338.20386

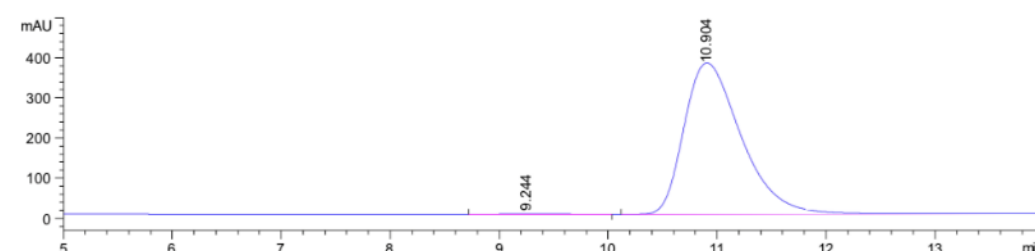

Signal 3: DAD1 D, Sig=220,4 Ref=360,100

| Peak # | RetTime [min] | Type | Width [min] | Area [mAU*s] | Height [mAU] | Area %  |
|--------|---------------|------|-------------|--------------|--------------|---------|
| 1      | 9.244         | BB   | 0.4938      | 26.22846     | 6.74327e-1   | 0.1906  |
| 2      | 10.904        | BV R | 0.5605      | 1.37357e4    | 376.49841    | 99.8094 |

Totals : 1.37620e4 377.17274

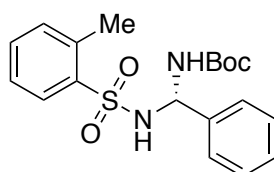

**3q**

**(S)-tert-butyl (2-methylphenylsulfonamido)(phenylmethyl)carbamate (3q)** The reaction was performed in 0.125mmol scale for 15h using 1 mol% Ca[(R)-PA]<sub>2</sub> in ether. The product was obtained by flash chromatography (hexane: acetone = 4:1) as a white solid 23mg, 99% yield, 97% *ee*. HPLC analysis (Chiralcel OD-H, 1.0 mL/min, 90:10 hexanes/iPrOH): *t<sub>R</sub>*(minor) = 8.04 min, *t<sub>R</sub>*(major) = 9.28 min.  $[\alpha]_D^{20} = +7.33$  (*c* = 0.320, CHCl<sub>3</sub>). <sup>1</sup>H NMR (400 MHz, Acetone-*d*<sub>6</sub>) δ 7.97 (dd, *J* = 7.9, 1.5 Hz, 1H), 7.50 (td, *J* = 7.5, 1.4 Hz, 1H), 7.44 – 7.20 (m, 8H), 6.74 (s, 1H), 6.14 (t, *J* = 8.8 Hz, 1H), 2.65 (s, 3H), 1.29 (s, 9H). <sup>13</sup>C NMR (100 MHz, Acetone-*d*<sub>6</sub>) δ 139.9, 136.9, 132.3, 132.2, 129.2, 128.3, 127.9, 126.2, 126.0, 78.7, 63.3, 27.6, 19.6. HRMS (ESI) Calcd for C<sub>19</sub>H<sub>24</sub>N<sub>2</sub>NaO<sub>4</sub>S ([M+Na]<sup>+</sup>) 399.1349, found 399.1340.

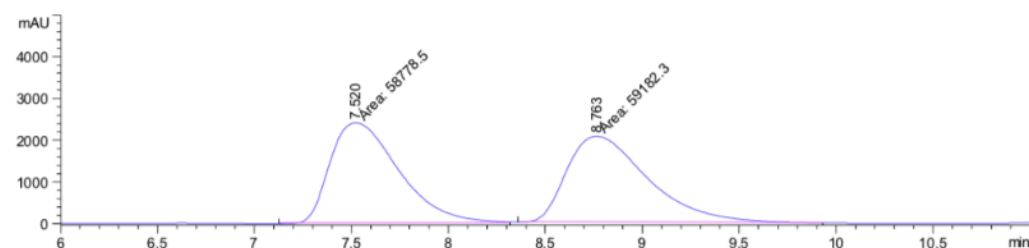

Signal 2: DAD1 B, Sig=220,4 Ref=360,100

| Peak # | RetTime [min] | Type | Width [min] | Area [mAU*s] | Height [mAU] | Area %  |
|--------|---------------|------|-------------|--------------|--------------|---------|
| 1      | 7.520         | MM   | 0.4084      | 5.87785e4    | 2398.46484   | 49.8288 |
| 2      | 8.763         | MM   | 0.4807      | 5.91823e4    | 2052.13135   | 50.1712 |

Totals : 1.17961e5 4450.59619

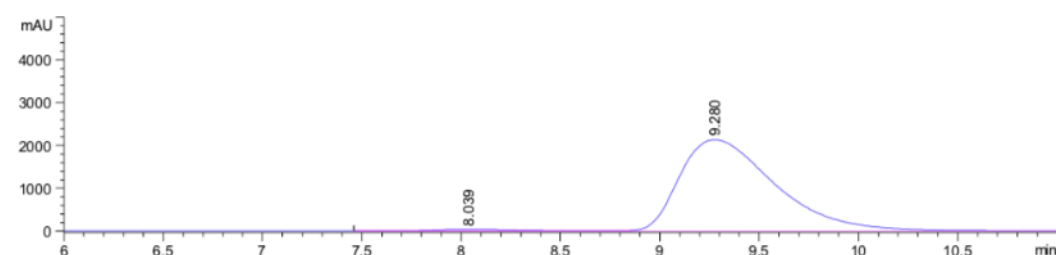

Signal 2: DAD1 B, Sig=220,4 Ref=360,100

| Peak # | RetTime [min] | Type | Width [min] | Area [mAU*s] | Height [mAU] | Area %  |
|--------|---------------|------|-------------|--------------|--------------|---------|
| 1      | 8.039         | BV E | 0.4403      | 1205.02185   | 41.80830     | 1.6160  |
| 2      | 9.280         | VV R | 0.5179      | 7.33648e4    | 2129.98462   | 98.3840 |

Totals : 7.45698e4 2171.79292

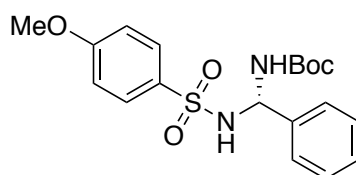

**3r**

**(S)-tert-butyl (4-methoxyphenylsulfonamido)(phenylmethyl)carbamate (3r)** The reaction was performed on a 0.125 mmol scale for 5 h using 5 mol% Ca[(R)-PA]<sub>2</sub> in ether. The product was obtained by flash chromatography (hexane: acetone = 4:1) as a white solid 23mg, 95% yield, >99% *ee*. HPLC analysis (Chiralcel OJ-H, 1.0 mL/min, 90:10 hexanes/iPrOH): *t<sub>R</sub>*(minor) = 20.60 min, *t<sub>R</sub>*(major) = 28.78 min. [ $\alpha$ ]<sub>D</sub><sup>20</sup> = -5.07 (*c* = 0.205, CHCl<sub>3</sub>). <sup>1</sup>H NMR (600 MHz, Acetone-*d*<sub>6</sub>)  $\delta$  7.84 (m, 2H), 7.41 (d, *J* = 7.6 Hz, 2H), 7.34 (td, *J* = 7.1, 6.2, 1.2 Hz, 2H), 7.31 – 7.26 (m, 1H), 7.13 – 7.04 (m, 3H), 6.69 (d, *J* = 9.0 Hz, 1H), 6.19 (t, *J* = 8.8 Hz, 1H), 3.90 (s, 3H), 1.33 (s, 9H). <sup>13</sup>C NMR (150 MHz, Acetone-*d*<sub>6</sub>)  $\delta$  163.6, 155.2, 141.2, 134.7, 130.1, 129.2, 128.7, 127.1, 114.9, 79.6, 64.3, 56.1, 28.5. HRMS (ESI) Calcd for C<sub>19</sub>H<sub>24</sub>N<sub>2</sub>NaO<sub>5</sub>S ([M+Na]<sup>+</sup>) 415.1298, found 415.1299.

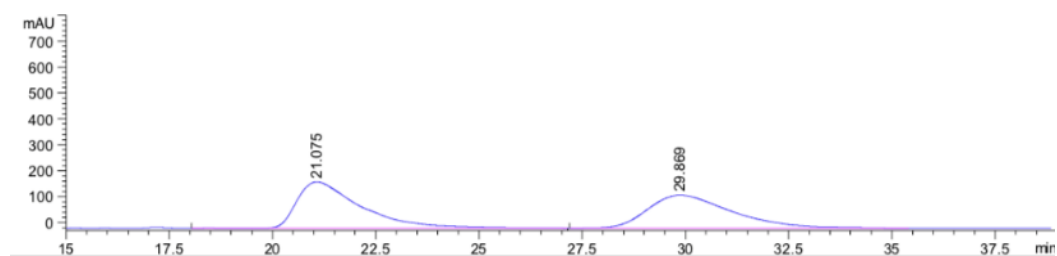

Signal 2: DAD1 B, Sig=210,4 Ref=360,100

| Peak # | RetTime [min] | Type | Width [min] | Area [mAU*s] | Height [mAU] | Area %  |
|--------|---------------|------|-------------|--------------|--------------|---------|
| 1      | 21.075        | W R  | 1.6207      | 1.92930e4    | 178.86012    | 51.7781 |
| 2      | 29.869        | BB   | 2.1196      | 1.79679e4    | 127.23364    | 48.2219 |

Totals : 3.72610e4 306.09377

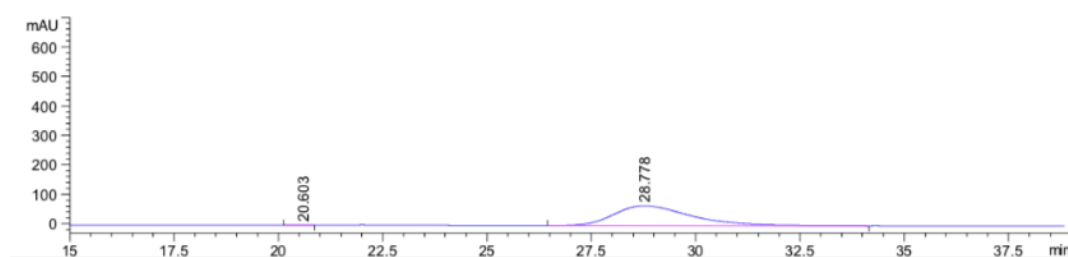

Signal 4: DAD1 D, Sig=210,4 Ref=360,100

| Peak # | RetTime [min] | Type | Width [min] | Area [mAU*s] | Height [mAU] | Area %  |
|--------|---------------|------|-------------|--------------|--------------|---------|
| 1      | 20.603        | BB   | 0.2933      | 5.99921      | 3.16205e-1   | 0.0696  |
| 2      | 28.778        | BB   | 1.9175      | 8614.58691   | 67.29176     | 99.9304 |

Totals : 8620.58612 67.60797

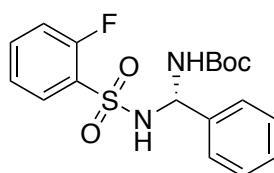

**3s**

**(S)-tert-butyl(2-fluorophenylsulfonamide)(phenylmethyl)carbamate (3s)** The reaction was performed on a 0.125 mmol scale for 20 h using 1 mol% Ca[(*R*)-**PA**]<sub>2</sub> in ether. The product was obtained by flash chromatography (hexane: acetone = 4:1) as a white solid 47mg, 99% yield, >99% *ee*. M.P.: 160-161 °C. HPLC analysis (Chiralcel AD-H, 1.0 mL/min, 90:10 hexanes/*i*PrOH): *t*<sub>R</sub>(minor) = 24.03 min, *t*<sub>R</sub>(major) = 37.64 min. [ $\alpha$ ]<sub>D</sub><sup>20</sup> = -2.15 (*c* = 0.090, CHCl<sub>3</sub>). <sup>1</sup>H NMR (600 MHz, Acetone-*d*<sub>6</sub>)  $\delta$  7.89 (td, *J* = 7.6, 1.8 Hz, 1H), 7.77 – 7.56 (m, 1H), 7.44 (dd, *J* = 23.2, 7.9 Hz, 3H), 7.38 – 7.26 (m, 5H), 6.76 (s, 1H), 6.19 (t, *J* = 9.0 Hz, 1H), 1.28 (s, 9H). <sup>13</sup>C NMR (150 MHz, Acetone-*d*<sub>6</sub>)  $\delta$  159.8 (d, *J* = 253.5 Hz), 155.1, 140.6, 135.8 (d, *J* = 8.5 Hz), 131.0, 130.6 (d, *J* =

13.8 Hz), 129.2, 128.8, 127.1, 125.4 (d,  $J = 3.6$  Hz), 117.6 (d,  $J = 21.1$  Hz), 79.8, 64.4, 28.5.

HRMS (ESI) Calcd for  $C_{18}H_{21}FN_2NaO_4S$  ( $[M+Na]^+$ ) 403.1098, found 403.1109.

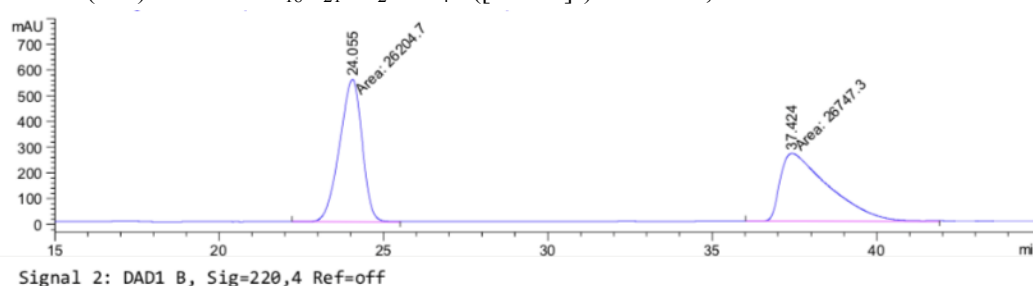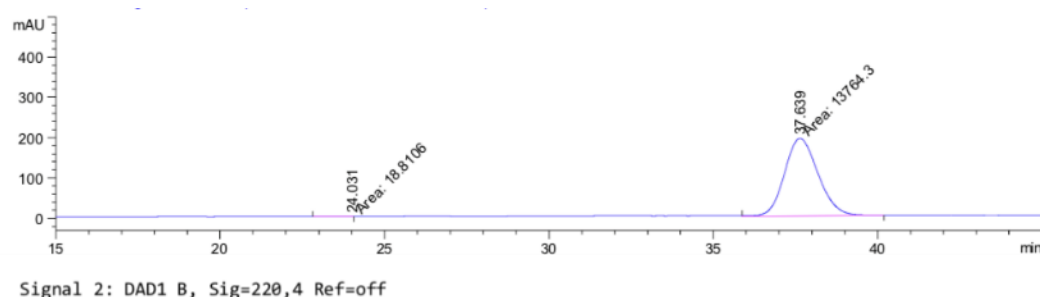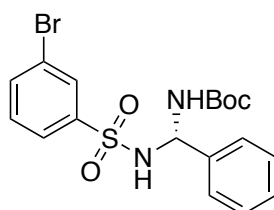

**3t**

**(S)-tert-butyl (3-bromophenylsulfonamido)(phenylmethyl)carbamate (3t)** The reaction was performed in 0.25mmol scale for 22h using 1 mol%  $Ca[(R)\text{-PA}]_2$  in toluene. The product was obtained by flash chromatography (hexane: acetone = 4:1) as a white solid 53mg, 96% yield, 99% *ee*. M.P.: 124-125 °C. HPLC analysis (Chiralcel OD-H, 1.0 mL/min, 90:10 hexanes/iPrOH):  $t_R$ (minor) = 7.72 min,  $t_R$ (major) = 9.57 min.  $[\alpha]_D^{20} = -3.63$  ( $c = 0.270$ ,  $CHCl_3$ ).  $^1H$  NMR (600 MHz, Acetone- $d_6$ )  $\delta$  8.03 (t,  $J = 1.9$  Hz, 1H), 7.91 (dt,  $J = 7.9, 1.3$  Hz, 1H), 7.80 (ddd,  $J = 8.1, 2.0, 1.0$  Hz, 1H), 7.53 (t,  $J = 7.9$  Hz, 1H), 7.49 (d,  $J = 7.2$  Hz, 1H), 7.44 (d,  $J = 7.6$  Hz, 2H), 7.38 – 7.32

(m, 2H), 7.32 – 7.28 (m, 1H), 6.89 – 6.79 (m, 1H), 6.24 (s, 1H), 1.32 (s, 9H).  $^{13}\text{C}$  NMR (150 MHz, Acetone- $d_6$ )  $\delta$  155.2, 145.2, 140.6, 136.0, 131.8, 130.7, 129.3, 129.0, 127.1, 126.8, 123.0, 79.9, 64.5, 28.6. HRMS (ESI) Calcd for  $\text{C}_{18}\text{H}_{21}\text{BrN}_2\text{NaO}_4\text{S}$  ( $[\text{M}+\text{Na}]^+$ ) 463.0298, found 463.0298.

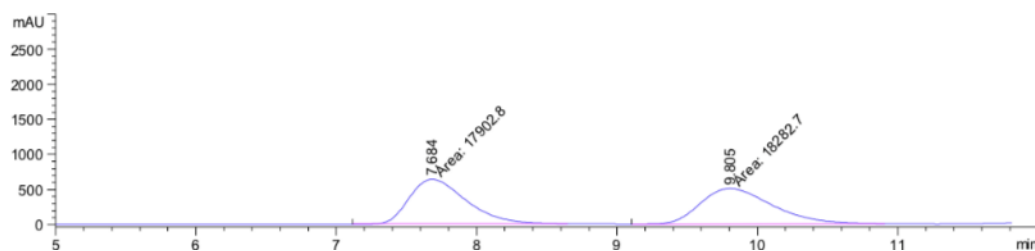

Signal 2: DAD1 B, Sig=220,4 Ref=off

| Peak # | RetTime [min] | Type | Width [min] | Area [mAU*s] | Height [mAU] | Area %  |
|--------|---------------|------|-------------|--------------|--------------|---------|
| 1      | 7.684         | MM   | 0.4707      | 1.79028e4    | 633.87115    | 49.4750 |
| 2      | 9.805         | MM   | 0.6004      | 1.82827e4    | 507.52985    | 50.5250 |

Totals : 3.61855e4 1141.40100

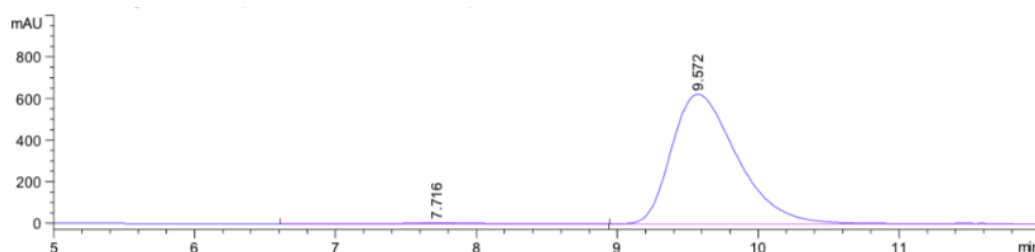

Signal 3: DAD1 C, Sig=220,4 Ref=off

| Peak # | RetTime [min] | Type | Width [min] | Area [mAU*s] | Height [mAU] | Area %  |
|--------|---------------|------|-------------|--------------|--------------|---------|
| 1      | 7.716         | VB R | 0.4573      | 140.37172    | 4.28236      | 0.6849  |
| 2      | 9.572         | BV R | 0.5067      | 2.03546e4    | 622.62317    | 99.3151 |

Totals : 2.04950e4 626.90553

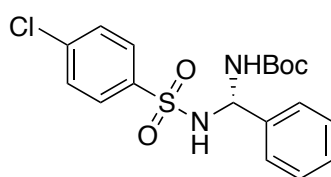

**3u**

**(S)-tert-butyl (4-chlorophenylsulfonamido)(phenylmethyl)carbamate (3u)** The reaction was performed in 0.125mmol scale for 15h using 1 mol%  $\text{Ca}[(R)\text{-PA}]_2$  in toluene. The product was obtained by flash chromatography (hexane: acetone = 4:1) as a white solid 24mg, 99% yield, 95% *ee*. HPLC analysis (Chiralcel OD-H, 1.0 mL/min, 90:10 hexanes/iPrOH):  $t_R(\text{minor})$  = 9.58 min,  $t_R(\text{major})$  = 12.26 min.  $[\alpha]_D^{20}$  = -11.15 ( $c$  = 0.160,  $\text{CHCl}_3$ ).  $^1\text{H}$  NMR (600 MHz, Acetone- $d_6$ )  $\delta$  7.93 – 7.87 (m, 2H), 7.62 – 7.55 (m, 2H), 7.43 (d,  $J$  = 7.2 Hz, 2H), 7.41 – 7.33 (m, 3H), 7.32 – 7.27 (m, 1H), 6.72 (s, 1H), 6.23 (t,  $J$  = 8.8 Hz, 1H), 1.32 (s, 9H).  $^{13}\text{C}$  NMR (150 MHz, Acetone- $d_6$ )



$\delta$  155.2, 142.0, 140.8, 138.7, 129.9, 129.8, 129.3, 128.8, 127.1, 79.8, 64.4, 28.5. HRMS (ESI) Calcd for  $C_{18}H_{21}ClN_2NaO_4S$  ( $[M+Na]^+$ ) 419.0803, found 419.0804.

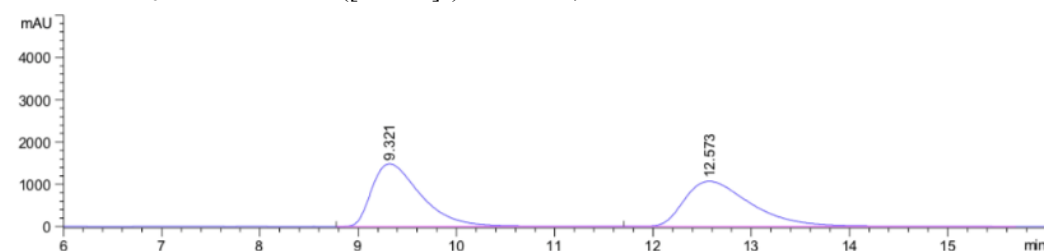

Signal 2: DAD1 B, Sig=220,4 Ref=360,100

| Peak # | RetTime [min] | Type | Width [min] | Area [mAU*s] | Height [mAU] | Area %  |
|--------|---------------|------|-------------|--------------|--------------|---------|
| 1      | 9.321         | VB   | 0.5323      | 5.13444e4    | 1481.76953   | 50.5758 |
| 2      | 12.573        | BB   | 0.7251      | 5.01754e4    | 1066.08545   | 49.4242 |

Totals : 1.01520e5 2547.85498

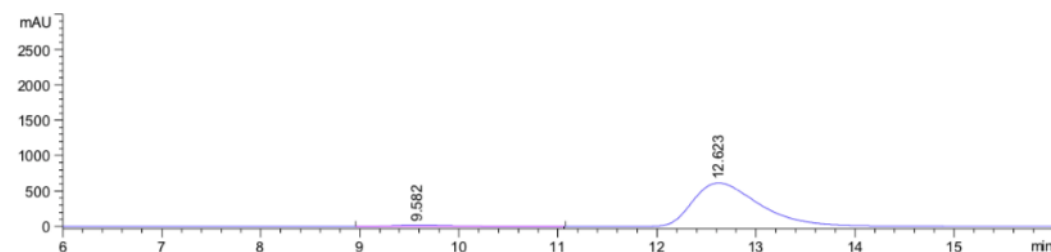

Signal 2: DAD1 B, Sig=220,4 Ref=360,100

| Peak # | RetTime [min] | Type | Width [min] | Area [mAU*s] | Height [mAU] | Area %  |
|--------|---------------|------|-------------|--------------|--------------|---------|
| 1      | 9.582         | BB   | 0.5700      | 761.34729    | 20.46556     | 2.5552  |
| 2      | 12.623        | BBA  | 0.7282      | 2.90352e4    | 613.43097    | 97.4448 |

Totals : 2.97965e4 633.89653

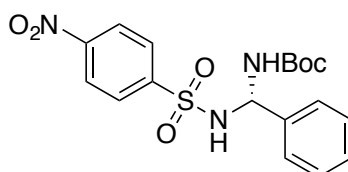

**3v**

**(S)-tert-butyl (4-nitrophenylsulfonamido)(phenylmethyl)carbamate (3v)** The reaction was performed in 0.125mmol scale for 50h using 1 mol%  $Ca[(R)\text{-PA}]_2$  in toluene. The product was obtained by flash chromatography (hexane: acetone = 4:1) as a white solid 21mg, 84% yield, 75% *ee*. M.P.: 136-137 °C. HPLC analysis (Chiralcel OD-H, 1.0 mL/min, 80:20 hexanes/iPrOH):  $t_R$ (minor) = 9.85 min,  $t_R$ (major) = 11.70 min.  $[\alpha]_D^{20} = +10.93$  ( $c = 0.320$ ,  $CHCl_3$ ).  $^1H$  NMR (600 MHz, Acetone- $d_6$ )  $\delta$  8.43 – 8.36 (m, 2H), 8.17 (d,  $J = 8.5$  Hz, 2H), 7.72 (d,  $J = 7.8$  Hz, 1H), 7.35 (t,  $J = 7.5$  Hz, 2H), 7.30 (dd,  $J = 8.4, 6.1$  Hz, 1H), 6.82 (s, 1H), 6.27 (t,  $J = 8.7$  Hz, 1H), 1.28 (s, 9H).

$^{13}\text{C}$  NMR (150 MHz, Acetone- $d_6$ )  $\delta$  155.2, 150.9, 148.7, 140.3, 129.5, 129.4, 129.0, 127.1, 124.9, 79.9, 64.7, 28.4. HRMS (ESI) Calcd for  $\text{C}_{18}\text{H}_{21}\text{N}_3\text{NaO}_6\text{S}$  ( $[\text{M}+\text{Na}]^+$ ) 430.1043, found 430.1042.

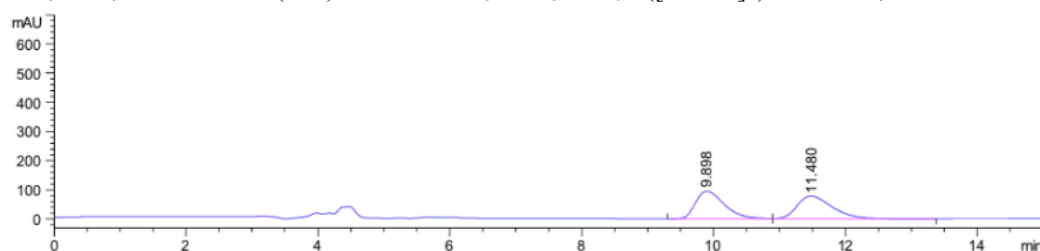

| Peak # | RetTime [min] | Type | Width [min] | Area [mAU*s] | Height [mAU] | Area %  |
|--------|---------------|------|-------------|--------------|--------------|---------|
| 1      | 9.898         | BV   | 0.4695      | 2897.25757   | 95.08879     | 49.6369 |
| 2      | 11.480        | VB   | 0.5764      | 2939.64648   | 78.23058     | 50.3631 |

Totals : 5836.90405 173.31937

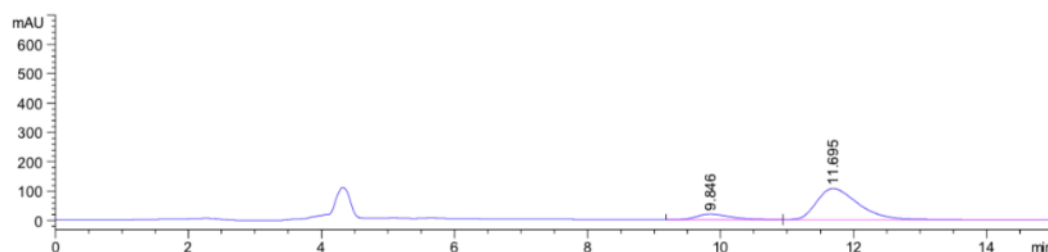

Signal 2: DAD1 B, Sig=220,4 Ref=off

| Peak # | RetTime [min] | Type | Width [min] | Area [mAU*s] | Height [mAU] | Area %  |
|--------|---------------|------|-------------|--------------|--------------|---------|
| 1      | 9.846         | BV   | 0.5561      | 670.68481    | 18.44890     | 12.5653 |
| 2      | 11.695        | W R  | 0.6728      | 4666.90869   | 105.85408    | 87.4347 |

Totals : 5337.59351 124.30298

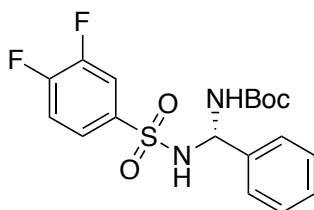

### 3w

**(S)-tert-butyl (3,4-difluorophenylsulfonamido)(phenylmethyl)carbamate (3w)** The reaction was performed in 0.125mmol scale for 5h using 5 mol%  $\text{Ca}[(R)\text{-PA}]_2$  in toluene. The product was obtained by flash chromatography (hexane: acetone = 4:1) as a white solid 24mg, 96% yield, 95% *ee*. M.P.: 141-142 °C. HPLC analysis (Chiralcel OD-H, 1.0 mL/min, 90:10 hexanes/iPrOH):  $t_R(\text{minor}) = 8.87$  min,  $t_R(\text{major}) = 11.21$  min.  $[\alpha]_D^{20} = +10.20$  ( $c = 0.445$ ,  $\text{CHCl}_3$ ).  $^1\text{H}$  NMR (600 MHz, Acetone- $d_6$ )  $\delta$  7.82 (td,  $J = 7.4, 3.5$  Hz, 1H), 7.80 – 7.75 (m, 1H), 7.54 (dt,  $J = 10.4, 8.2$  Hz, 1H), 7.51 – 7.48 (m, 1H), 7.44 (d,  $J = 7.8$  Hz, 2H), 7.36 (t,  $J = 7.6$  Hz, 2H), 7.33 – 7.29 (m, 1H),

6.83 (s, 1H), 6.23 (s, 1H), 1.33 (s, 9H).  $^{13}\text{C}$  NMR (150 MHz, Acetone- $d_6$ )  $\delta$  155.3, 153.4 (dd,  $J = 252.7, 12.7$  Hz), 150.5 (dd,  $J = 255.8, 13.4$  Hz), 140.5, 140.3, 129.3, 128.9, 125.6 (d,  $J = 7.0$  Hz), 118.9 (d,  $J = 19.7$  Hz), 117.8 (d,  $J = 20.8$  Hz), 79.8, 64.5, 28.4. HRMS (ESI) Calcd for  $\text{C}_{18}\text{H}_{20}\text{F}_2\text{N}_2\text{NaO}_4\text{S}$  ( $[\text{M}+\text{Na}]^+$ ) 421.1004, found 421.1001.

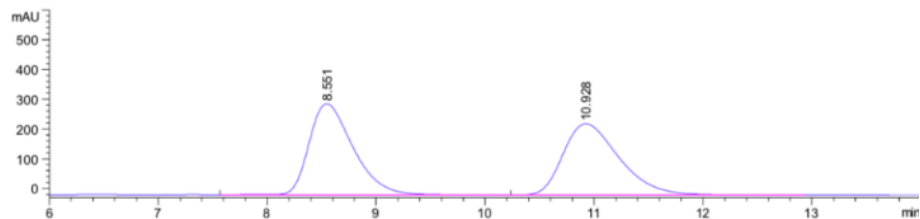

Signal 2: DAD1 B, Sig=220,4 Ref=off

| Peak # | RetTime [min] | Type | Width [min] | Area [mAU*s] | Height [mAU] | Area %  |
|--------|---------------|------|-------------|--------------|--------------|---------|
| 1      | 8.551         | VB R | 0.4308      | 8597.42676   | 305.78113    | 50.1878 |
| 2      | 10.928        | BB   | 0.5445      | 8533.06836   | 239.04318    | 49.8122 |

Totals : 1.71305e4 544.82431

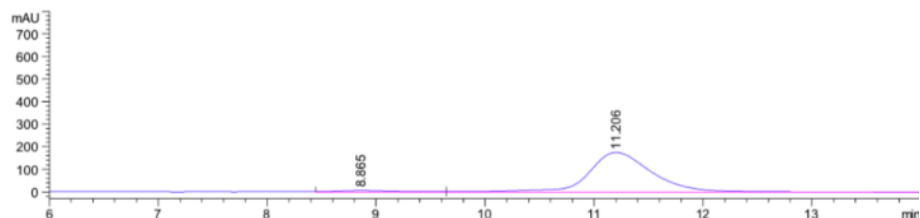

Signal 2: DAD1 B, Sig=220,4 Ref=off

| Peak # | RetTime [min] | Type | Width [min] | Area [mAU*s] | Height [mAU] | Area %  |
|--------|---------------|------|-------------|--------------|--------------|---------|
| 1      | 8.865         | WV   | 0.4640      | 175.76302    | 5.69625      | 2.4796  |
| 2      | 11.206        | VBA  | 0.5988      | 6912.50000   | 174.25714    | 97.5204 |

Totals : 7088.26302 179.95339

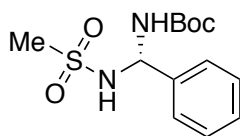

**3x**

**(S)-tert-butyl (4-methylsulfonylamido)(phenylmethyl)carbamate (3x)** The reaction was performed in 0.25mmol scale for 3h using 5 mol%  $\text{Ca}[(R)\text{-PA}]_2$  in ether. The product was obtained by flash chromatography (hexane: acetone = 4:1) as a white solid 35mg, 94% yield, 84% *ee*. M.P.: 143-144 °C. HPLC analysis (Chiralcel AD-H, 1.0 mL/min, 90:10 hexanes/iPrOH):  $t_R(\text{minor}) = 12.63$  min,  $t_R(\text{major}) = 13.93$  min.  $[\alpha]_D^{20} = +1.64$  ( $c = 0.340$ ,  $\text{CHCl}_3$ ).  $^1\text{H}$  NMR (600 MHz, Acetone- $d_6$ )  $\delta$  7.53 (d,  $J = 7.5$  Hz, 2H), 7.39 (t,  $J = 7.6$  Hz, 2H), 7.33 (d,  $J = 7.3$  Hz, 1H), 7.05 (d,  $J = 8.9$  Hz, 1H), 6.89 (d,  $J = 9.0$  Hz, 1H), 6.25 (t,  $J = 9.1$  Hz, 1H), 3.06 (s, 3H), 1.45 (s,

9H).  $^{13}\text{C}$  NMR (150 MHz, Acetone- $d_6$ )  $\delta$  156.1, 141.0, 129.3, 128.8, 127.2, 80.1, 64.4, 42.0, 28.5.

HRMS (ESI) Calcd for  $\text{C}_{13}\text{H}_{20}\text{N}_2\text{NaO}_4\text{S}$  ( $[\text{M}+\text{Na}]^+$ ) 323.1036, found 323.1048.

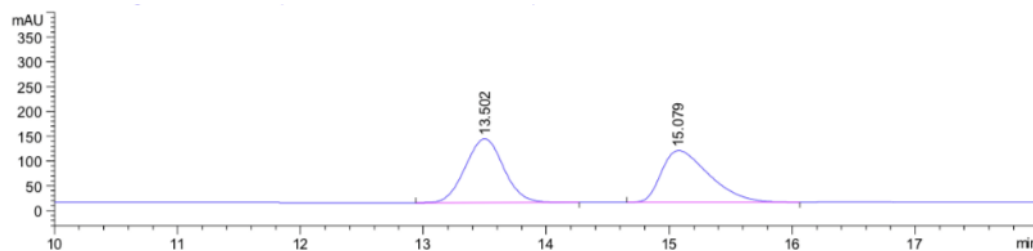

Signal 3: DAD1 C, Sig=220,4 Ref=360,100

| Peak # | RetTime [min] | Type | Width [min] | Area [mAU*s] | Height [mAU] | Area %  |
|--------|---------------|------|-------------|--------------|--------------|---------|
| 1      | 13.502        | BB   | 0.3402      | 2799.68726   | 128.48338    | 49.8816 |
| 2      | 15.079        | BB   | 0.4147      | 2812.98364   | 104.29829    | 50.1184 |

Totals : 5612.67090 232.78167

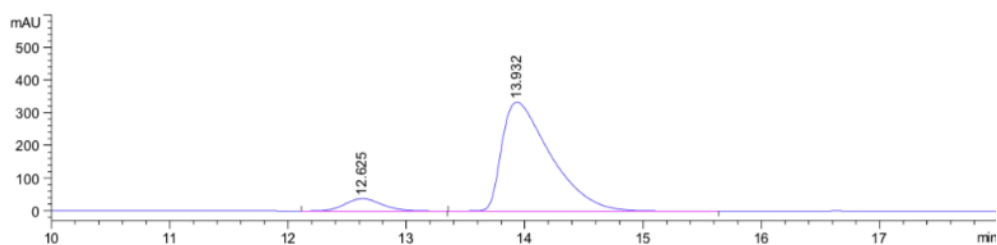

Signal 3: DAD1 C, Sig=220,4 Ref=off

| Peak # | RetTime [min] | Type | Width [min] | Area [mAU*s] | Height [mAU] | Area %  |
|--------|---------------|------|-------------|--------------|--------------|---------|
| 1      | 12.625        | BB   | 0.3326      | 806.94025    | 37.56426     | 7.7973  |
| 2      | 13.932        | BB   | 0.4279      | 9542.06738   | 333.39578    | 92.2027 |

Totals : 1.03490e4 370.96004

## Large scale reaction producing product 3p

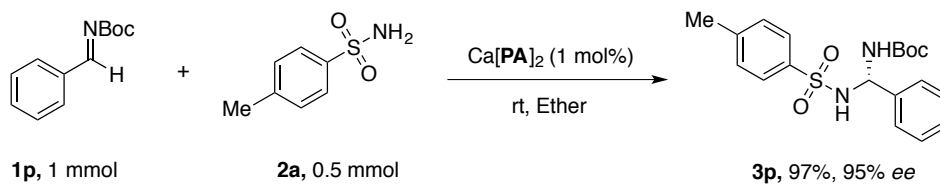

The reaction was performed in a 1 mmol scale (imine). The reaction was run for 4h using 1 mol%  $\text{Ca}[(R)\text{-PA}]_2$  in ether. The product was obtained by flash chromatography (hexane: acetone = 4:1) as a white solid 183.6 mg, 97% yield, 95% ee. HPLC analysis (Chiralcel OD-H, 1.0 mL/min, 90:10 hexanes/iPrOH):  $t_R(\text{minor}) = 9.83$  min,  $t_R(\text{major}) = 11.30$  min.

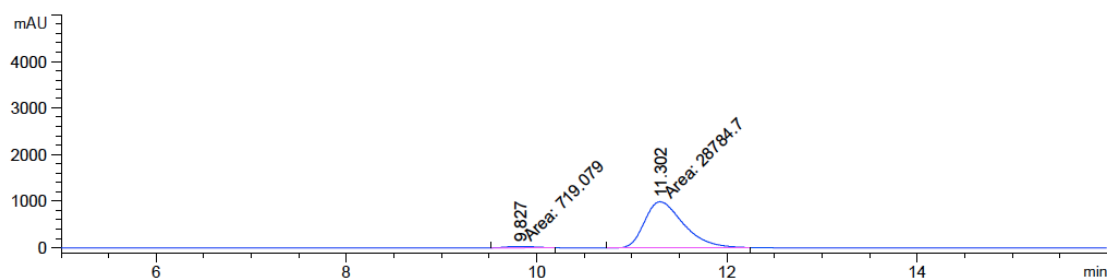

Signal 2: DAD1 B, Sig=220,4 Ref=off

| Peak # | RetTime [min] | Type | Width [min] | Area [mAU*s] | Height [mAU] | Area %  |
|--------|---------------|------|-------------|--------------|--------------|---------|
| 1      | 9.827         | MM   | 0.3621      | 719.07947    | 33.10196     | 2.4372  |
| 2      | 11.302        | MM   | 0.4826      | 2.87847e4    | 994.14484    | 97.5628 |

Totals :                      2.95038e4   1027.24679

## Crystal growth conditions and data

### Crystal growth conditions of 3a

After dissolving the compound **3a** in minimal acetone, an appropriate amount of hexanes was added and then allowed to stand at room temperature. Some small holes were punctured into the sealing film on the bottle. After leaving it in a cool place for some time, slow evaporation of the solvent allowed for X-ray quality crystals to form.

### X-ray structure of 3a

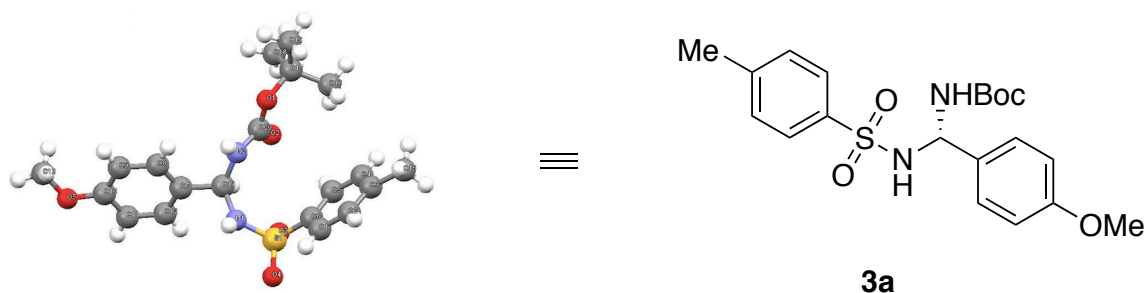

### Crystal measurement and data for 3a

|                        |                                                                 |                                                                 |               |
|------------------------|-----------------------------------------------------------------|-----------------------------------------------------------------|---------------|
| Bond precision:        | C-C = 0.0085 Å                                                  | Wavelength=1.54184                                              |               |
| Cell:                  | a=5.1266(2)                                                     | b=20.3732(11)                                                   | c=20.4123(12) |
|                        | alpha=90                                                        | beta=90                                                         | gamma=90      |
| Temperature:           | 160 K                                                           |                                                                 |               |
|                        | Calculated                                                      | Reported                                                        |               |
| Volume Space           | 2131.97(19)                                                     | 2131.97(19)                                                     |               |
| group Hall group       | P 21 21 21                                                      | P 21 21 21                                                      |               |
| Moiety formula         | P 2ac 2ab C20                                                   | P 2ac 2ab                                                       |               |
|                        | H <sub>20</sub> H <sub>26</sub> N <sub>2</sub> O <sub>5</sub> S | C <sub>20</sub> H <sub>26</sub> N <sub>2</sub> O <sub>5</sub> S |               |
| Sum formula            | C <sub>20</sub> H <sub>26</sub> N <sub>2</sub> O <sub>5</sub> S | C <sub>20</sub> H <sub>26</sub> N <sub>2</sub> O <sub>5</sub> S |               |
| Mr                     | 406.49                                                          | 406.49                                                          |               |
| Dx,g cm <sup>-3</sup>  | 1.266                                                           | 1.266                                                           |               |
| Z                      | 4                                                               | 4                                                               |               |
| Mu (mm <sup>-1</sup> ) | 1.623                                                           | 1.623                                                           |               |
| F000                   | 864.0                                                           | 864.0                                                           |               |
| F000'                  | 867.90                                                          |                                                                 |               |
| h,k,lmax               | 6,25,25                                                         | 6,25,25                                                         |               |

|           |             |             |
|-----------|-------------|-------------|
| Nref      | 4540[ 2648] | 4273        |
| Tmin,Tmax | 0.943,0.952 | 0.378,1.000 |
| Tmin'     | 0.922       |             |

Correction method= # Reported T Limits: Tmin=0.378 Tmax=1.000 AbsCorr =  
MULTI-SCAN

|                              |                    |
|------------------------------|--------------------|
| Data completeness= 1.61/0.94 | Theta(max)= 77.396 |
|------------------------------|--------------------|

|                               |                                 |
|-------------------------------|---------------------------------|
| R(reflections)= 0.0501( 3093) | wR2(reflections)= 0.1485( 4273) |
|-------------------------------|---------------------------------|

|           |           |
|-----------|-----------|
| S = 1.051 | Npar= 267 |
|-----------|-----------|

## References

1. (a) Ding, Z. S.; Osminski, W. E. G.; Ren, H.; Wulff, W. D. Scalable Syntheses of the Vaulted Biaryl Ligands VAPOL and VANOL via the Cycloaddition/Electrocyclization Cascade. *Org. Process Res. Dev.* **2011**, *15*, 1089. (b) Desai, A. A.; Huang, L.; Wulff, W. D.; Rowland, G. B.; Antilla, J. C. Gram-Scale Preparation of VAPOL Hydrogenphosphate: A Structurally Distinct Chiral Brønsted Acid. *Synthesis* **2010**, 2106. (c) Gupta, A. K.; Zhang, X.; Staples, R. J.; Wulff, W. D. The *iso*-VAPOL Ligand: Synthesis, Solid-State Structure and its Evaluation as a BOROX Catalyst. *Catal. Sci. Technol.* **2014**, *4*, 4406.
2. Zheng, W. H.; Zhang, Z. H.; Kaplan, M. J.; Antilla, J. C. Chiral Calcium VAPOL Phosphate Mediated Asymmetric Chlorination and Michael Reactions of 3-Substituted Oxindoles. *J. Am. Chem. Soc.* **2011**, *133*, 3339.
3. Wenzel, A. G.; Jacobsen, E. N. Asymmetric catalytic Mannich reactions catalyzed by urea derivatives: Enantioselective synthesis of beta-aryl-beta-amino acids. *J. Am. Chem. Soc.* **2002**, *124*, 12964.



---

**$^1\text{H}$ -NMR,  $^{13}\text{C}$ -NMR spectra data**

$^1\text{H}$ -NMR (600 MHz, Acetone- $d_6$ ) of compound of **3a**

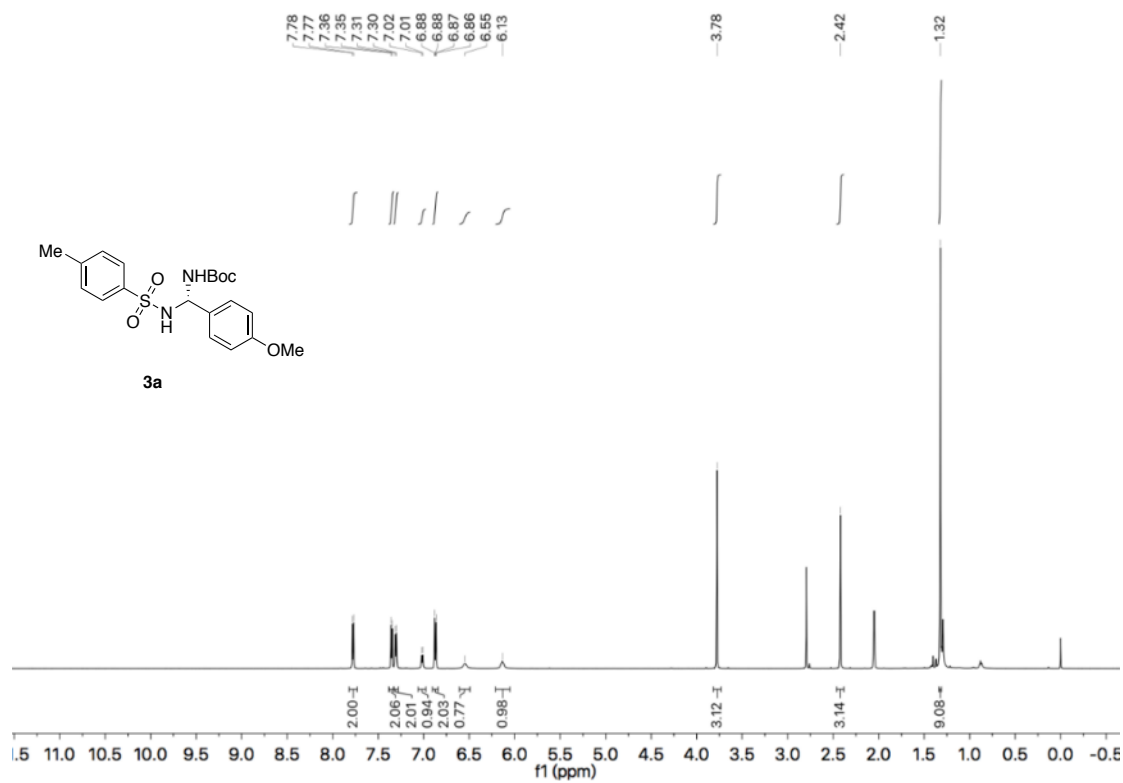

$^{13}\text{C}$ -NMR (150 MHz, Acetone- $d_6$ ) of compound of **3a**

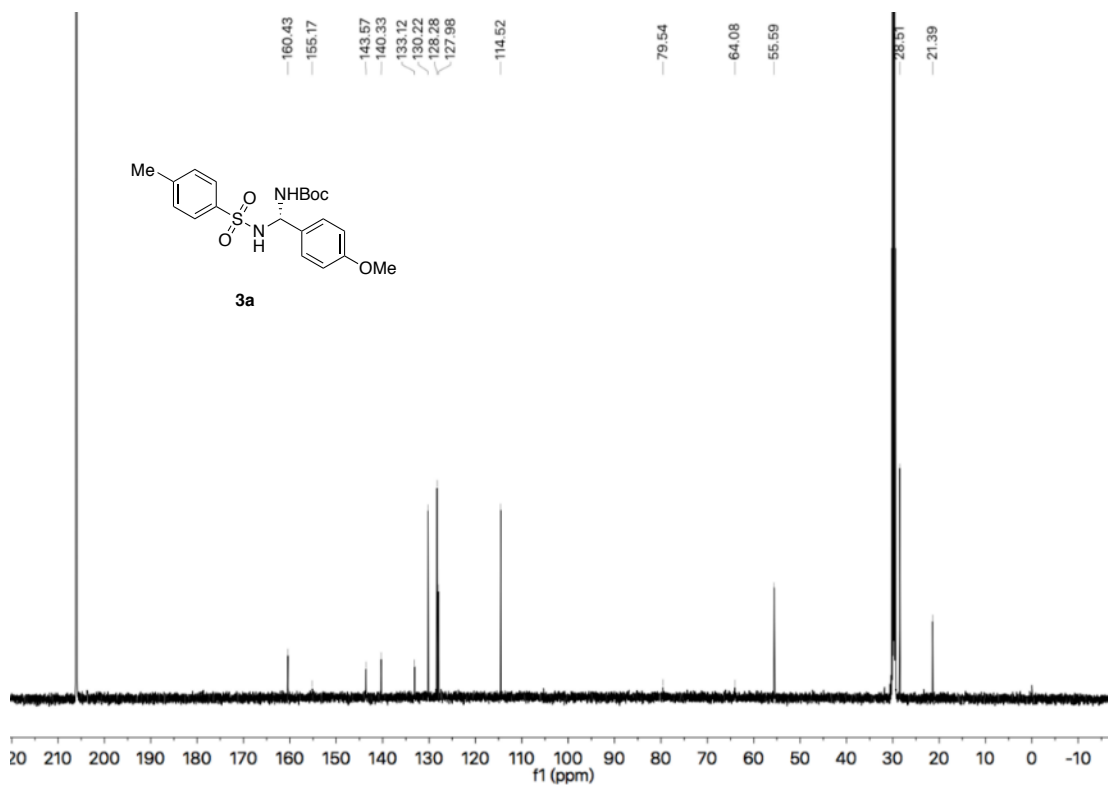

$^1\text{H}$ -NMR (600 MHz, Acetone- $d_6$ ) of compound of **3b**

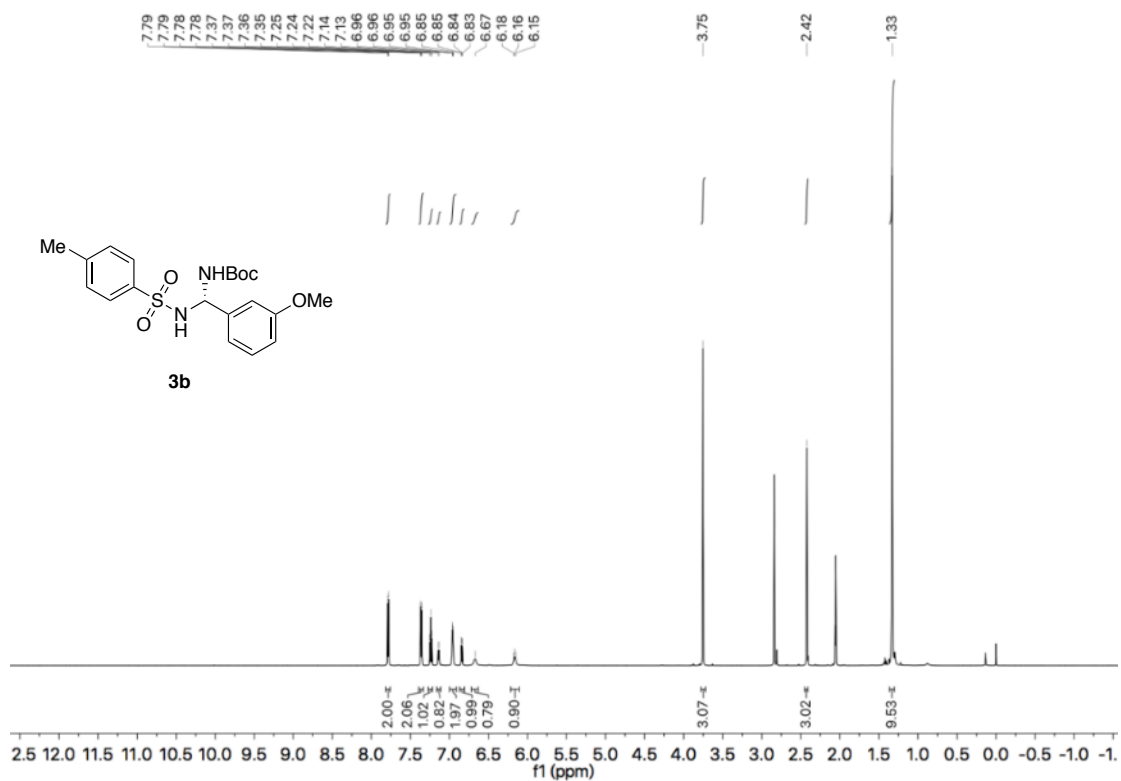

$^{13}\text{C}$ -NMR (150 MHz, Acetone- $d_6$ ) of compound of **3b**

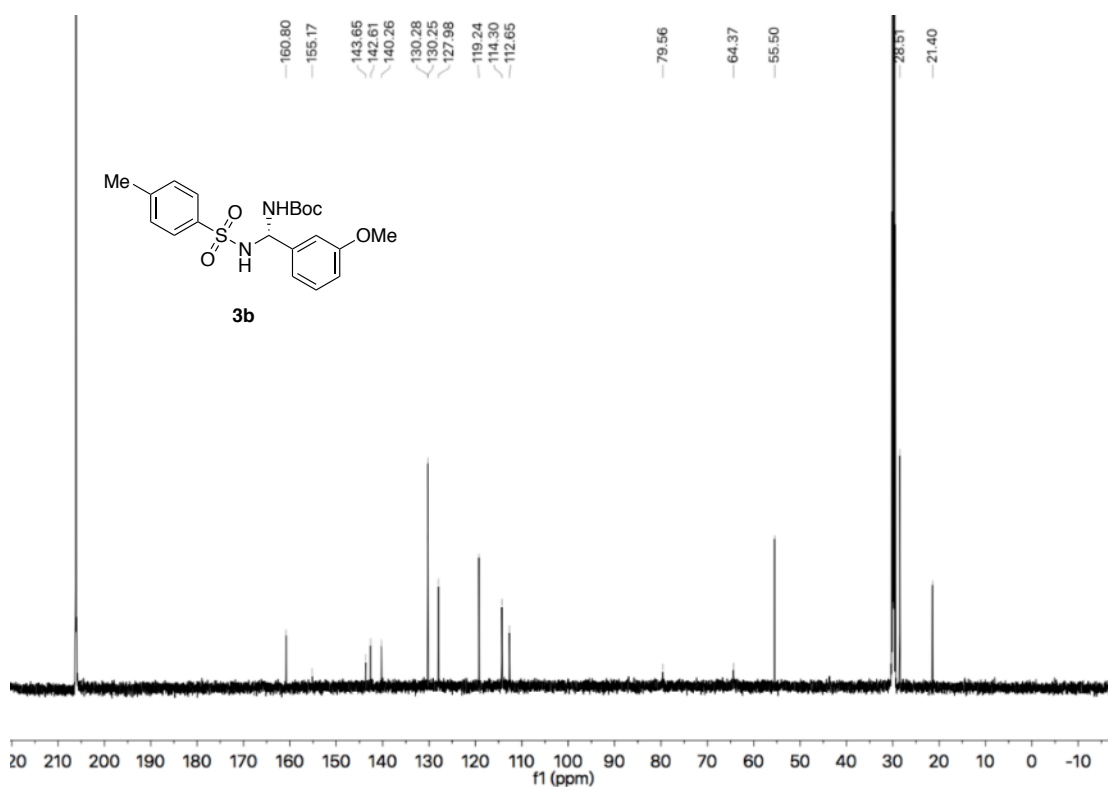

$^1\text{H}$ -NMR of (600 MHz, Acetone- $d_6$ ) compound of **3c**

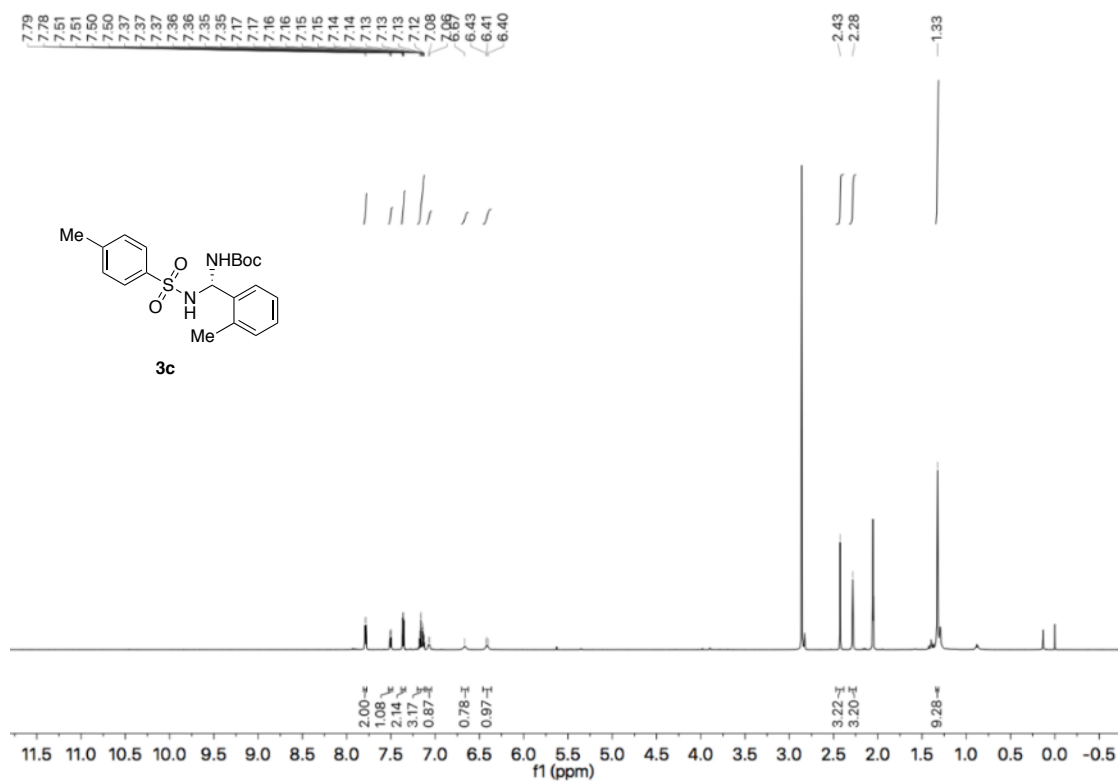

$^{13}\text{C}$ -NMR (150 MHz, Acetone- $d_6$ ) of compound of **3c**

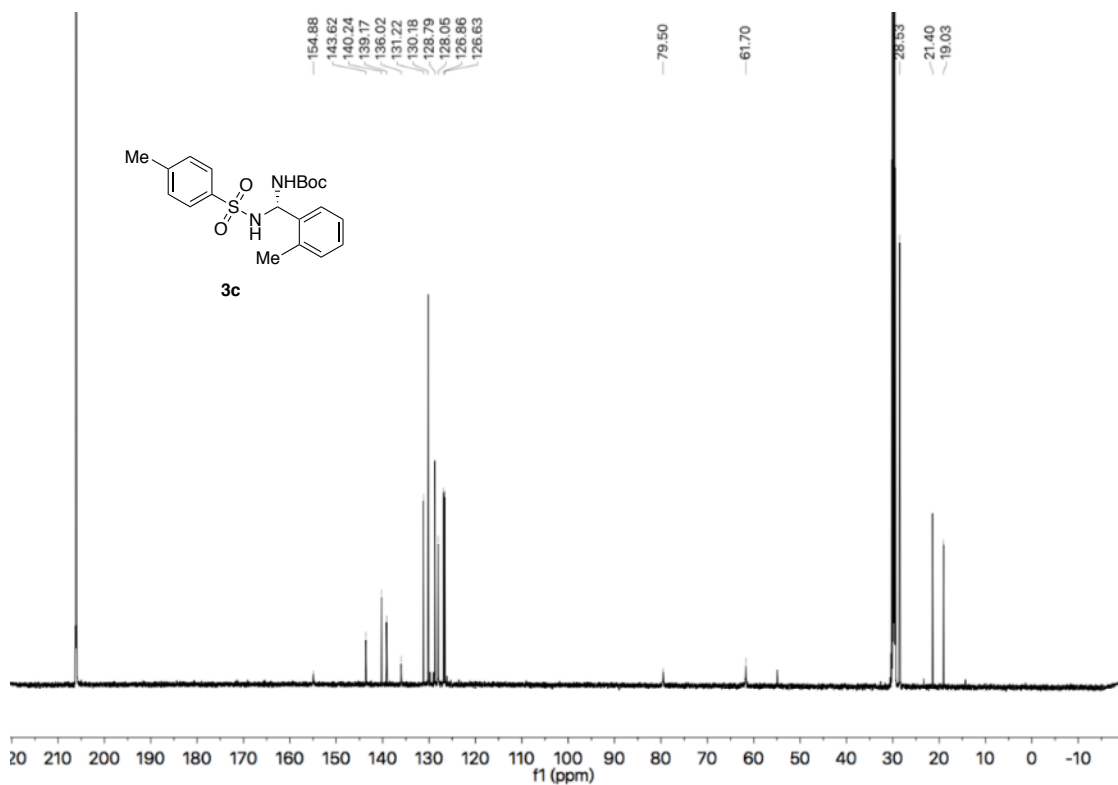

$^1\text{H}$ -NMR (600 MHz, Acetone- $d_6$ ) of compound of **3d**

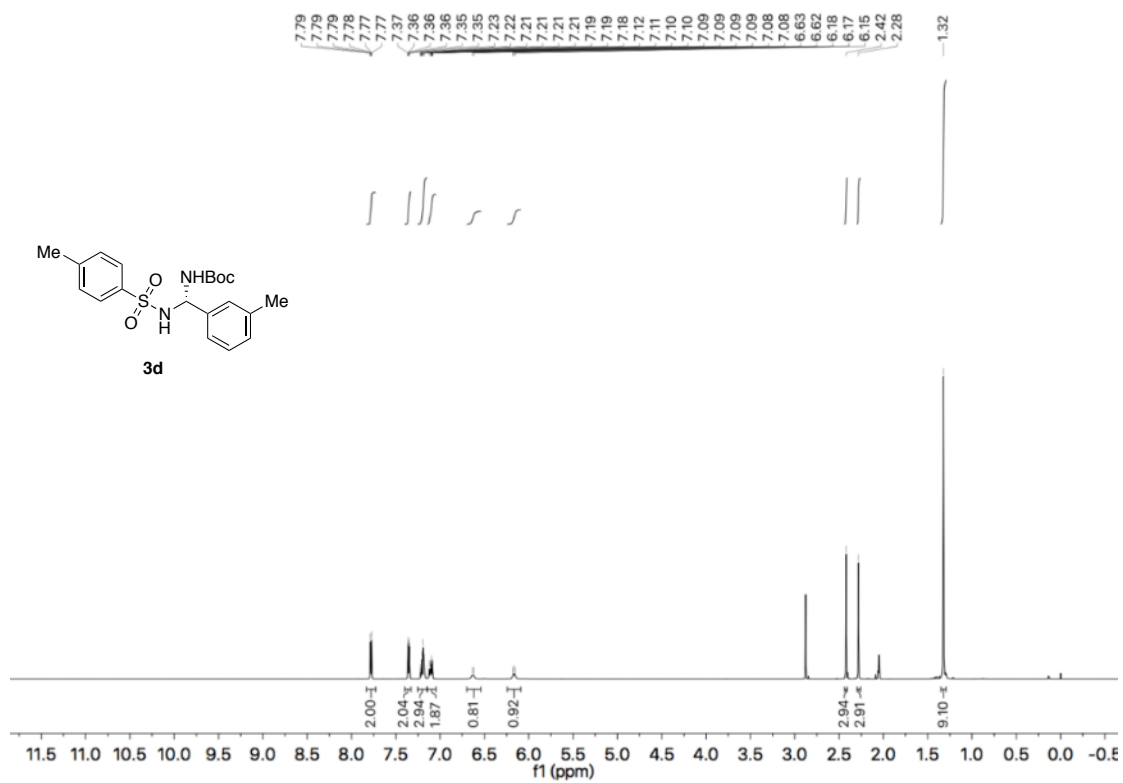

$^{13}\text{C}$ -NMR (150 MHz, Acetone- $d_6$ ) of compound of **3d**

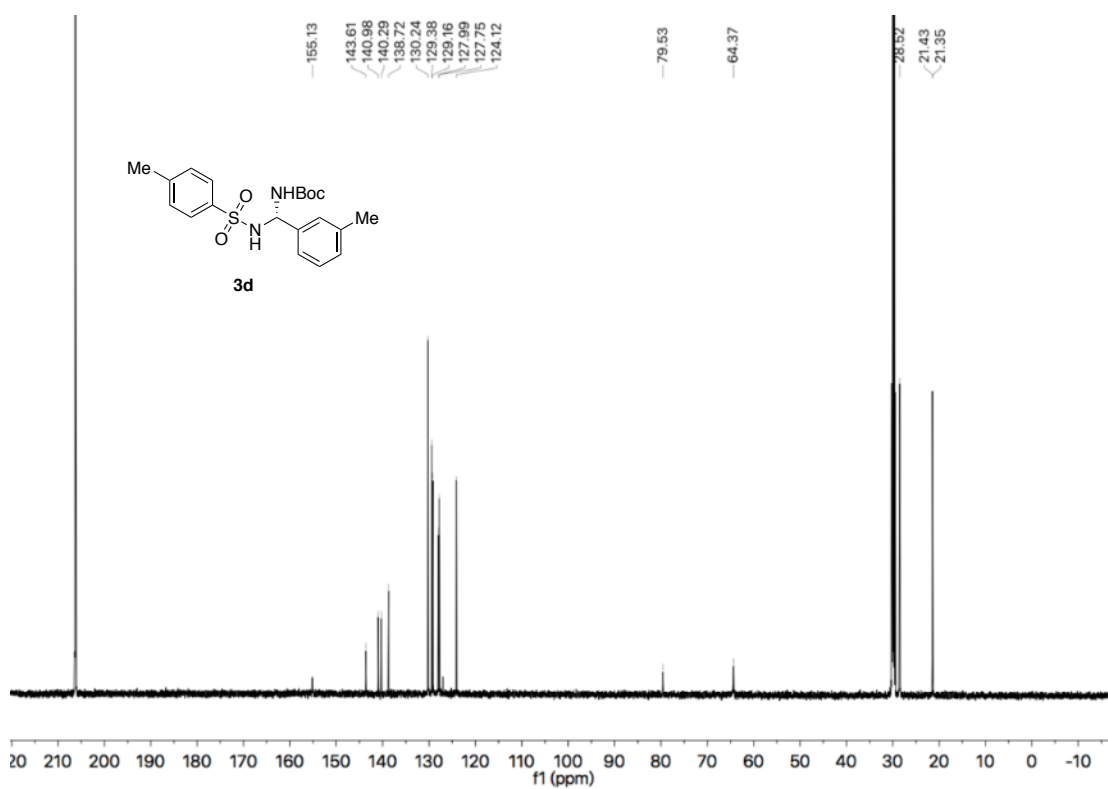

$^1\text{H}$ -NMR (600 MHz, Acetone- $d_6$ ) of compound of **3e**

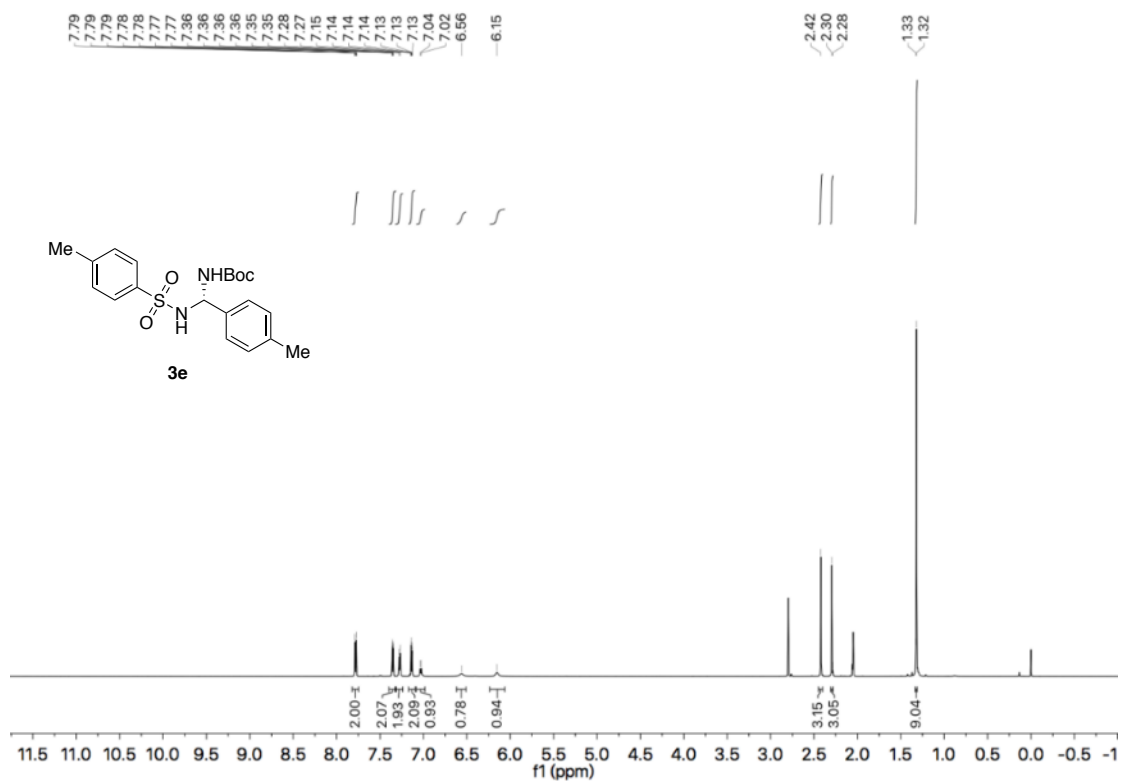

$^{13}\text{C}$ -NMR (150 MHz, Acetone- $d_6$ ) of compound of **3e**

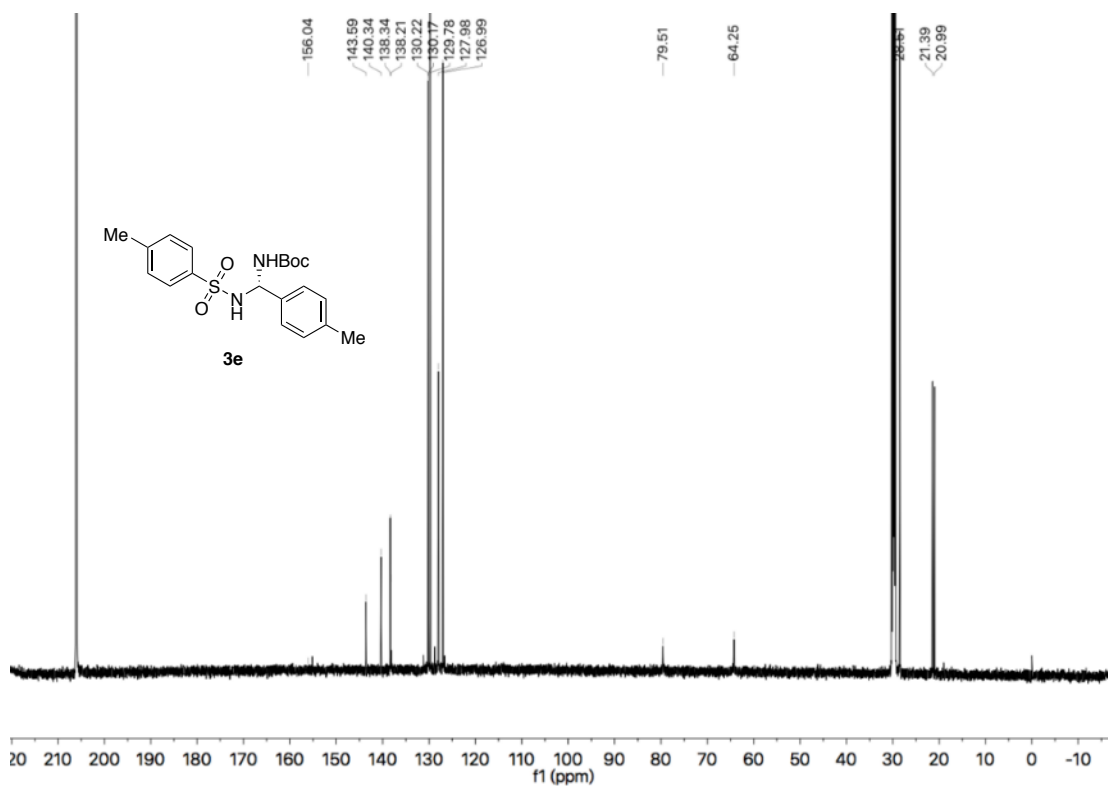

$^1\text{H}$ -NMR (600 MHz, Acetone- $d_6$ ) of compound of **3f**

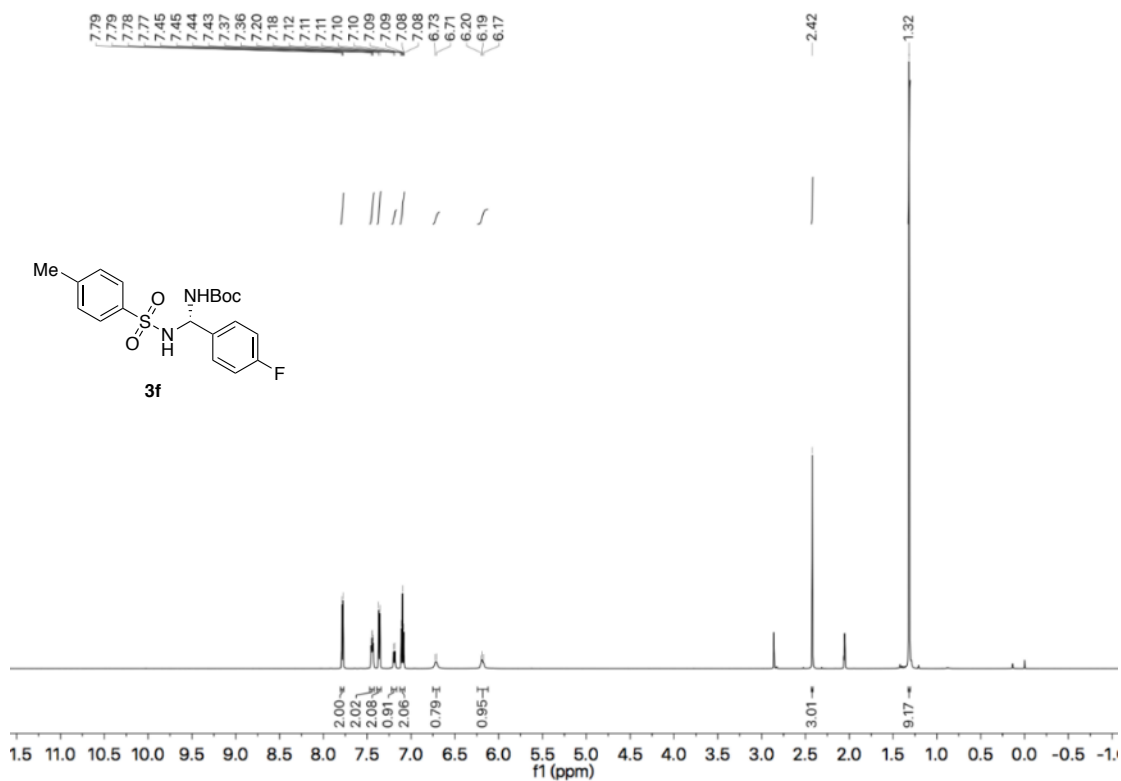

$^{13}\text{C}$ -NMR (150 MHz, Acetone- $d_6$ ) of compound of **3f**

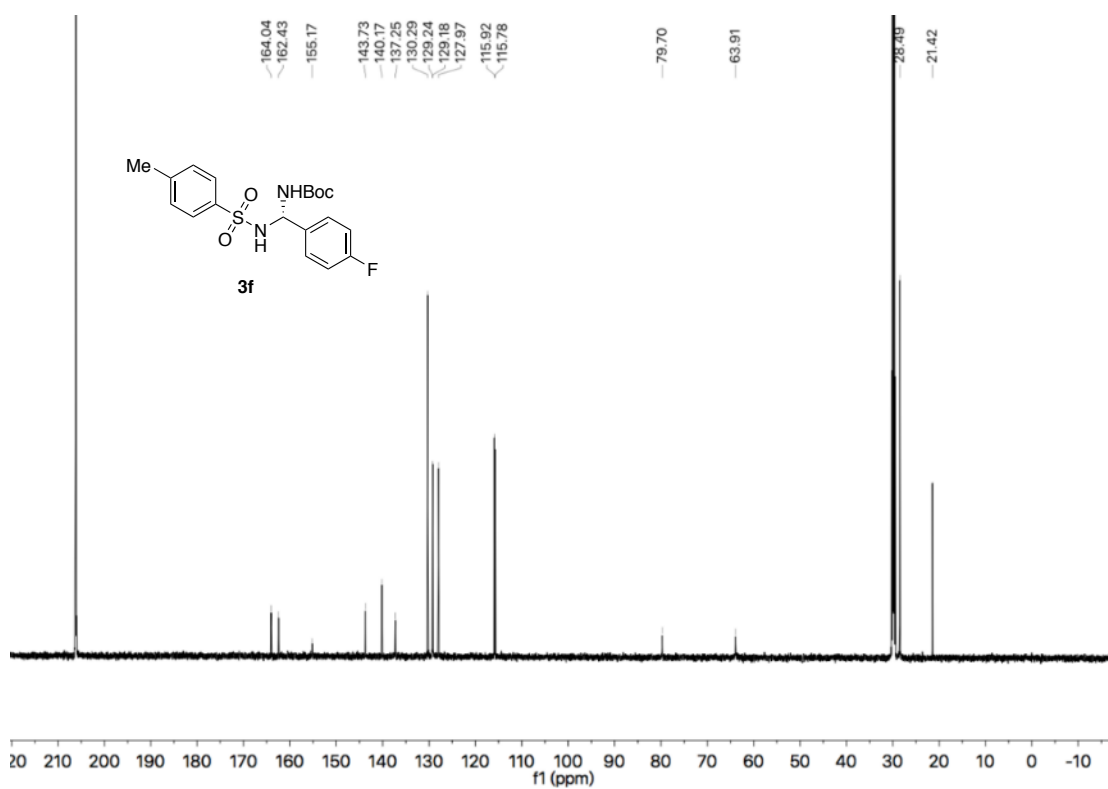

$^1\text{H}$ -NMR (600 MHz, Acetone- $d_6$ ) of compound of **3g**

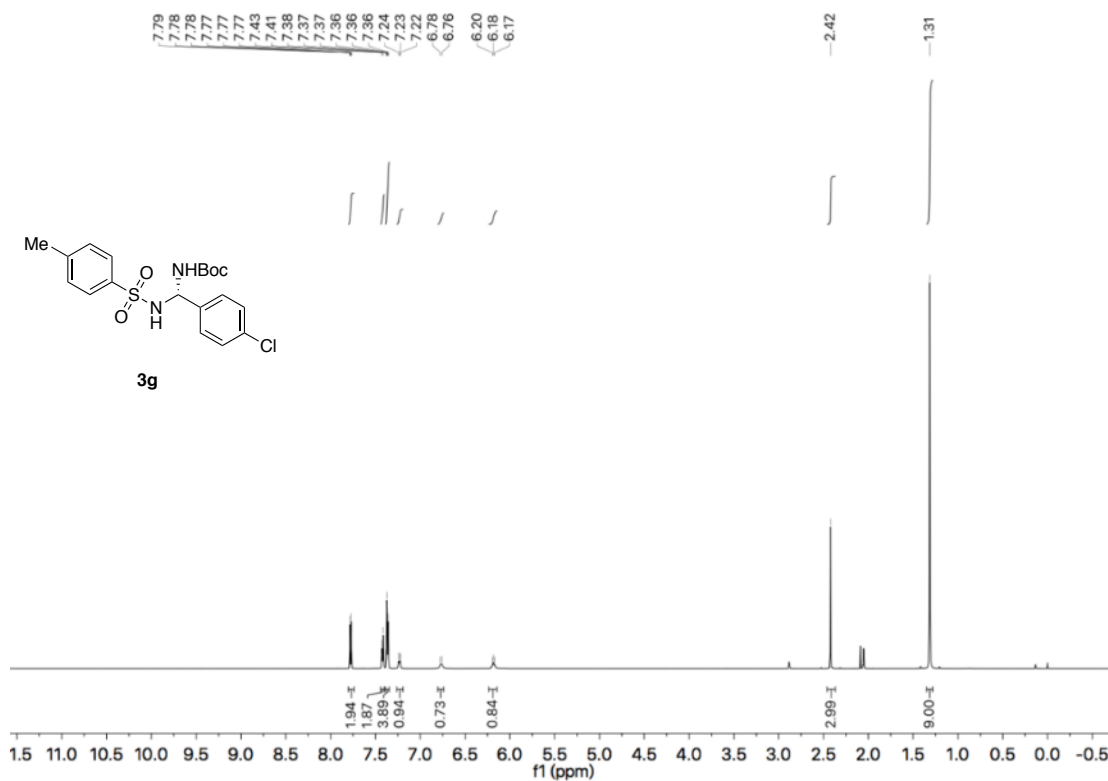

$^{13}\text{C}$ -NMR (150 MHz, Acetone- $d_6$ ) of compound of **3g**

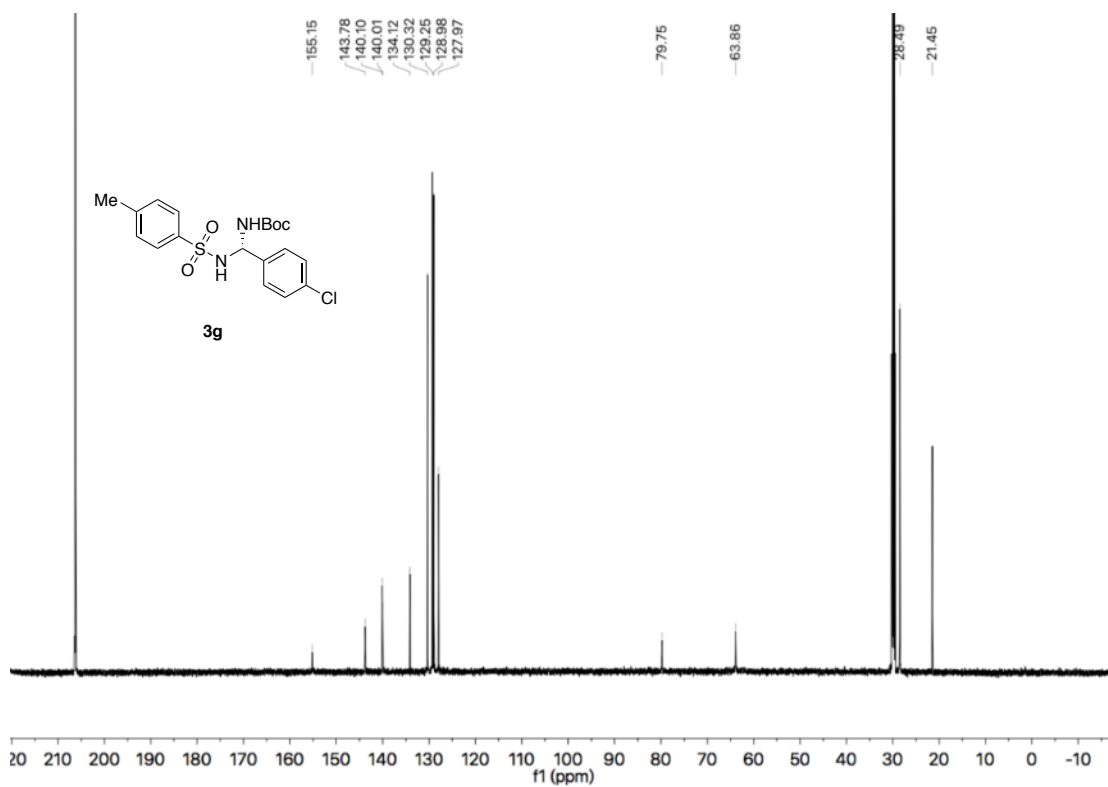



$^1\text{H}$ -NMR (600 MHz, Acetone- $d_6$ ) of compound of **3h**

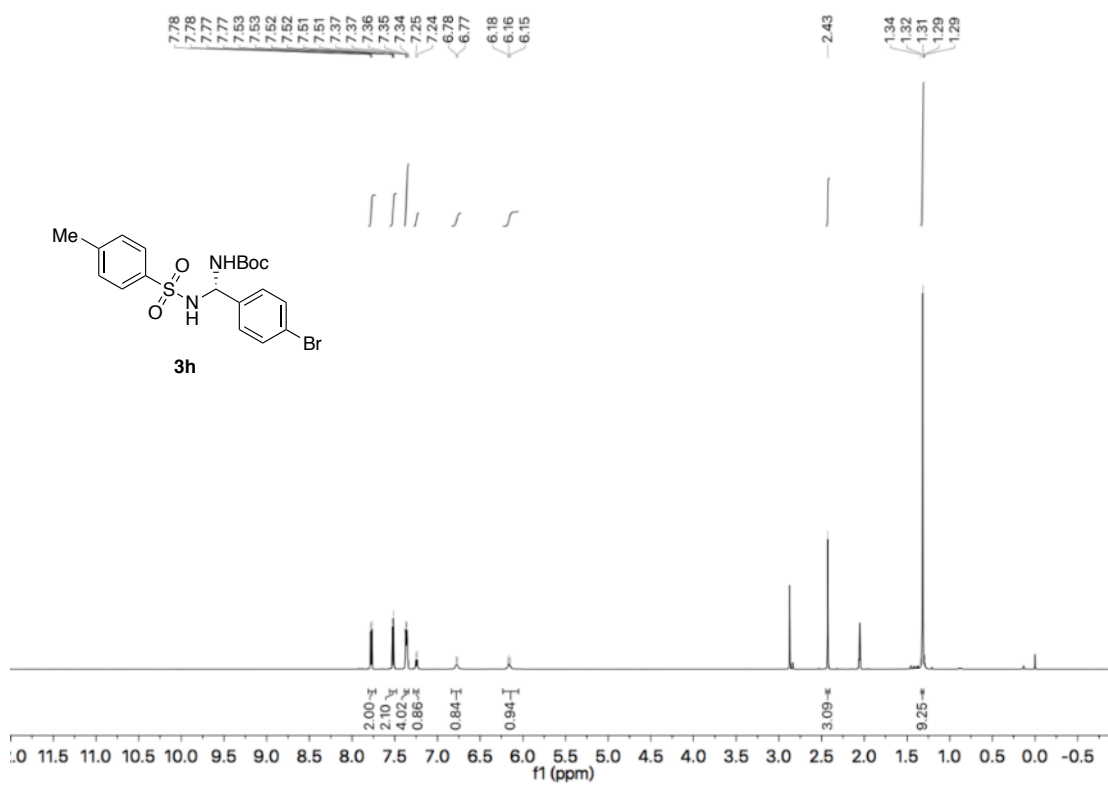

$^{13}\text{C}$ -NMR (150 MHz, Acetone- $d_6$ ) of compound of **3h**

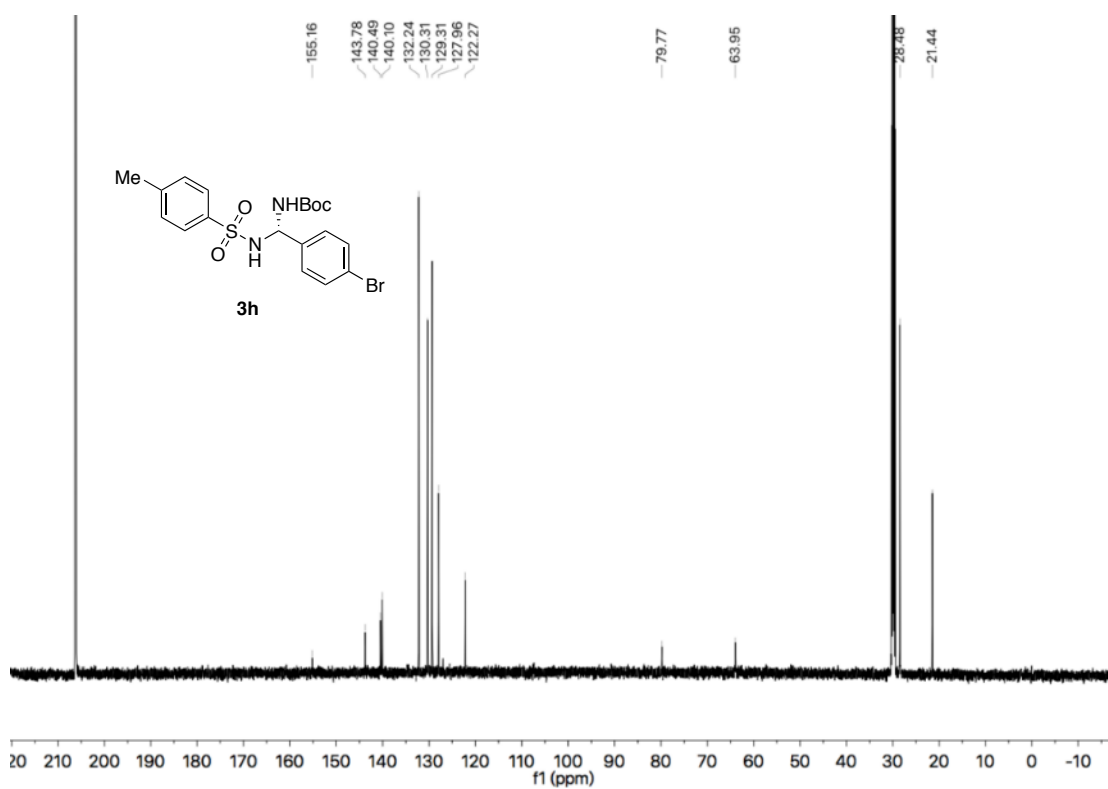

$^1\text{H}$ -NMR (600 MHz, Acetone- $d_6$ ) of compound of **3i**

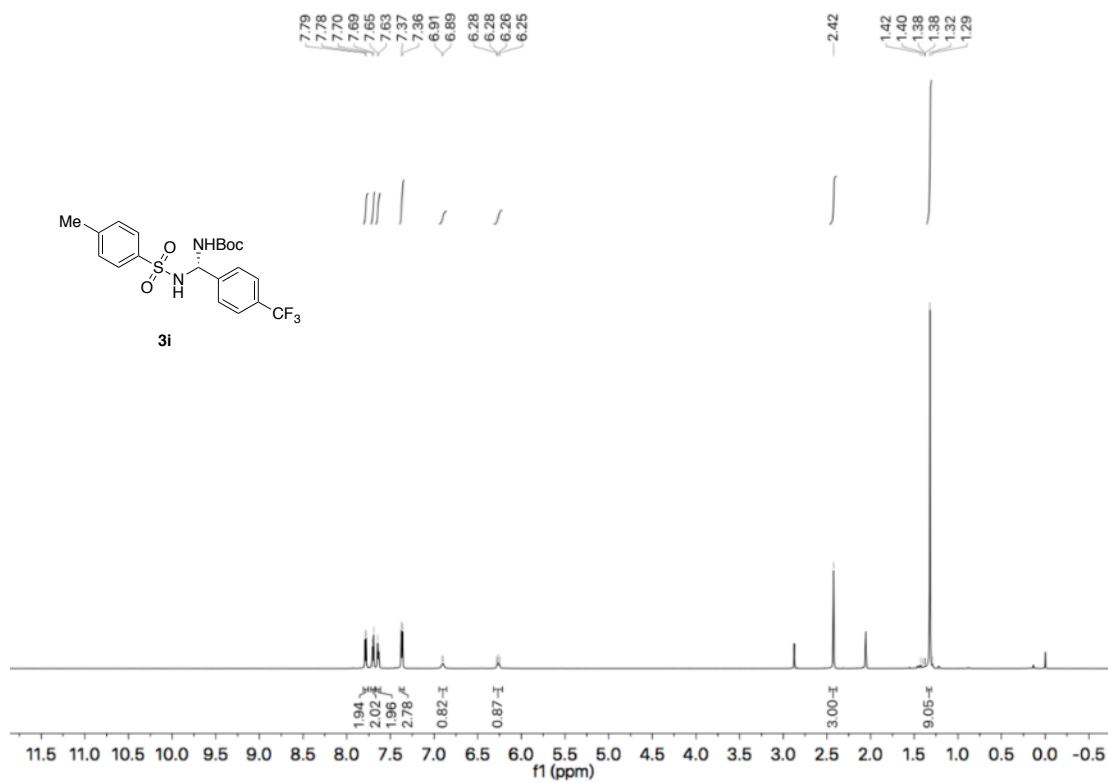

$^{13}\text{C}$ -NMR (150 MHz, Acetone- $d_6$ ) of compound of **3i**

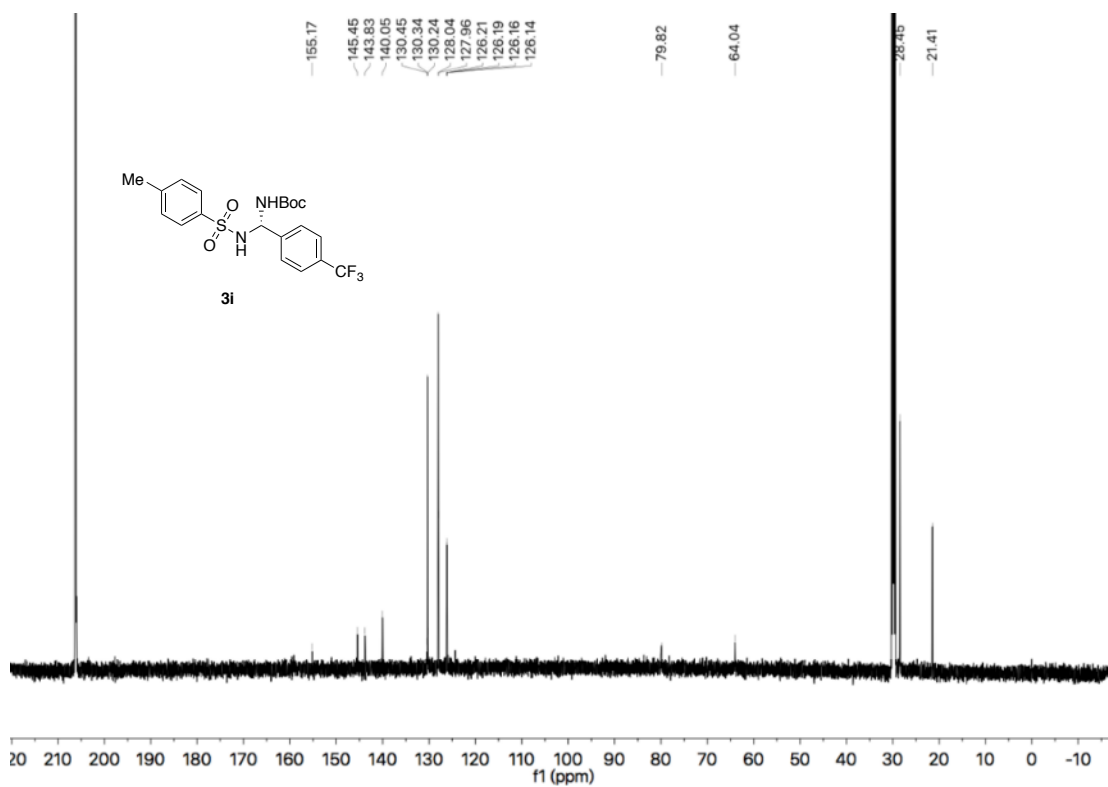

Cc1ccc(cc1)S(=O)(=O)N[C@@H](c2ccc(F)cc2)C(=O)OC(C)(C)C

**3j**

$\delta$  (ppm): 7.80, 7.80, 7.80, 7.79, 7.79, 7.78, 7.78, 7.78, 7.40, 7.39, 7.39, 7.39, 7.38, 7.38, 7.38, 7.37, 7.37, 7.37, 7.36, 7.36, 7.28, 7.26, 7.24, 7.23, 7.19, 7.18, 7.18, 7.17, 7.17, 7.16, 7.08, 7.08, 7.08, 7.08, 7.07, 7.07, 7.06, 7.06, 7.06, 7.06, 7.05, 7.05, 7.05, 7.04, 7.04, 6.78, 6.22, 6.20, 6.20, 6.19, 6.19, 2.42, 1.35, 1.32, 1.31.

Chemical structure of **3j** is shown above the spectrum. The spectrum displays peaks corresponding to the chemical structure, with the following chemical shifts (ppm) labeled above the peaks:

164.45, 162.83, 155.17, 144.02, 143.97, 143.79, 140.13, 131.19, 131.14, 130.31, 127.96, 123.17, 115.53, 115.39, 114.10, 113.94, 79.76, 63.91, 28.47, 21.42.

$^1\text{H}$ -NMR (600 MHz, Acetone- $d_6$ ) of compound of **3k**

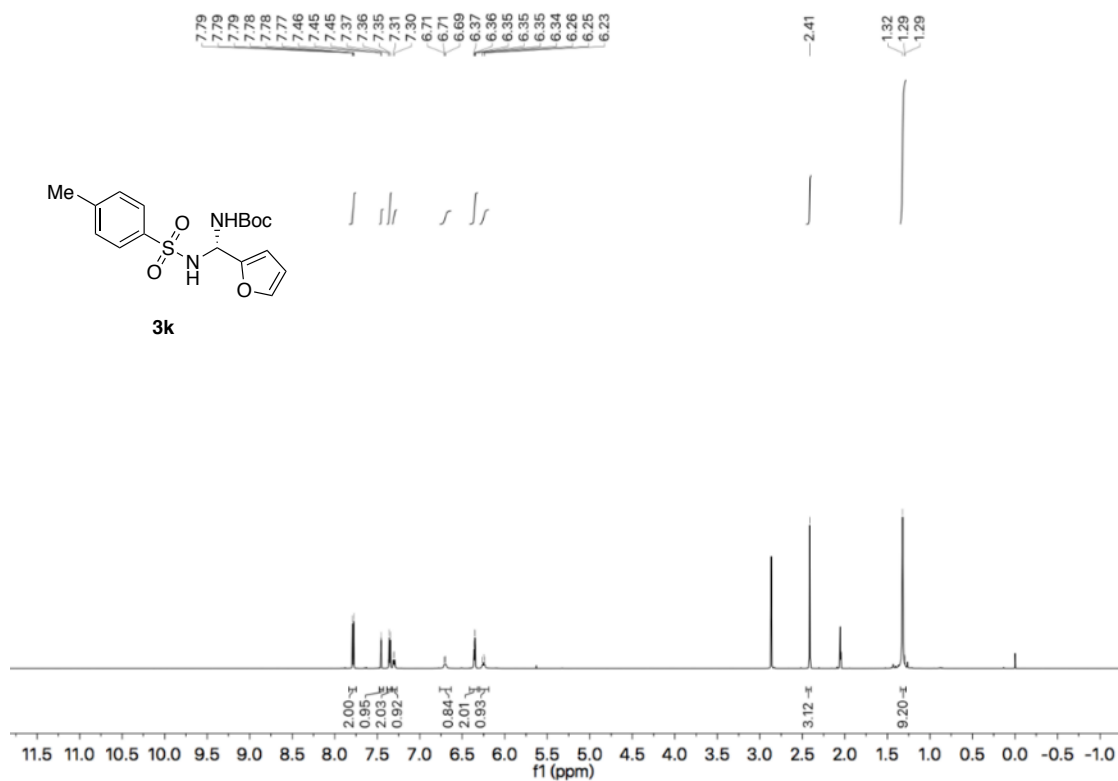

$^{13}\text{C}$ -NMR (150 MHz, Acetone- $d_6$ ) of compound of **3k**

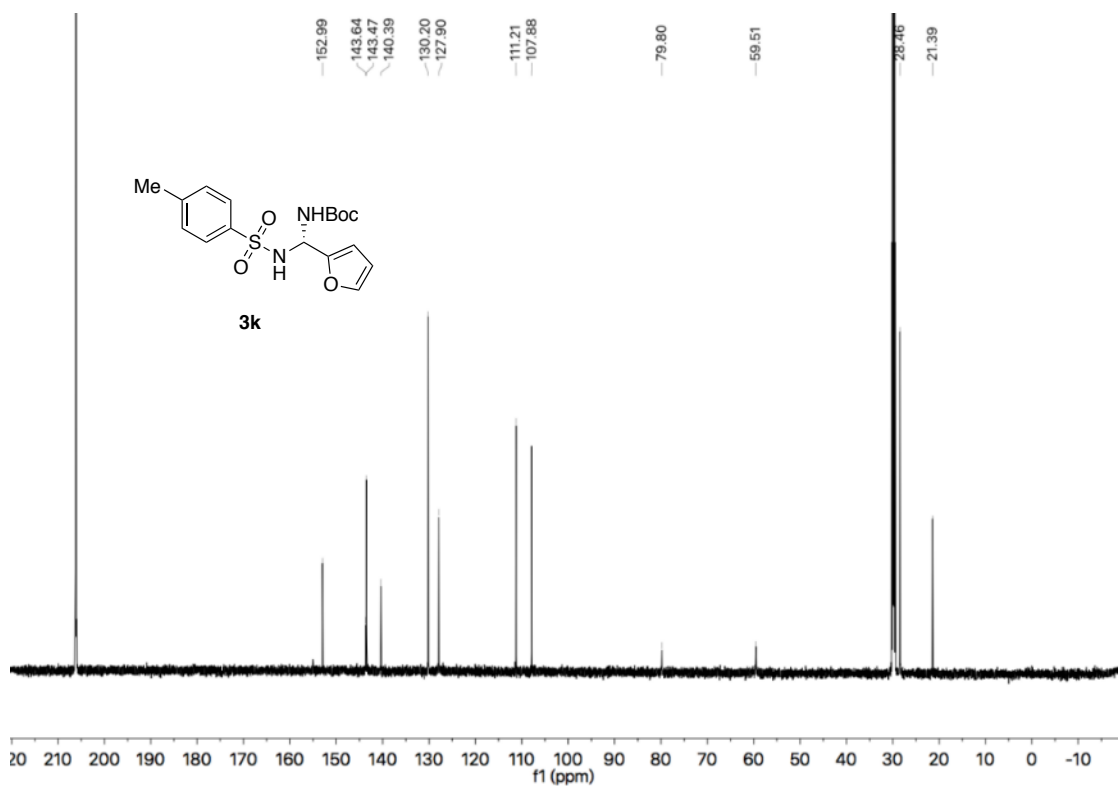

<sup>1</sup>H-NMR (600 MHz, Acetone-*d*<sub>6</sub>) of compound of **31**

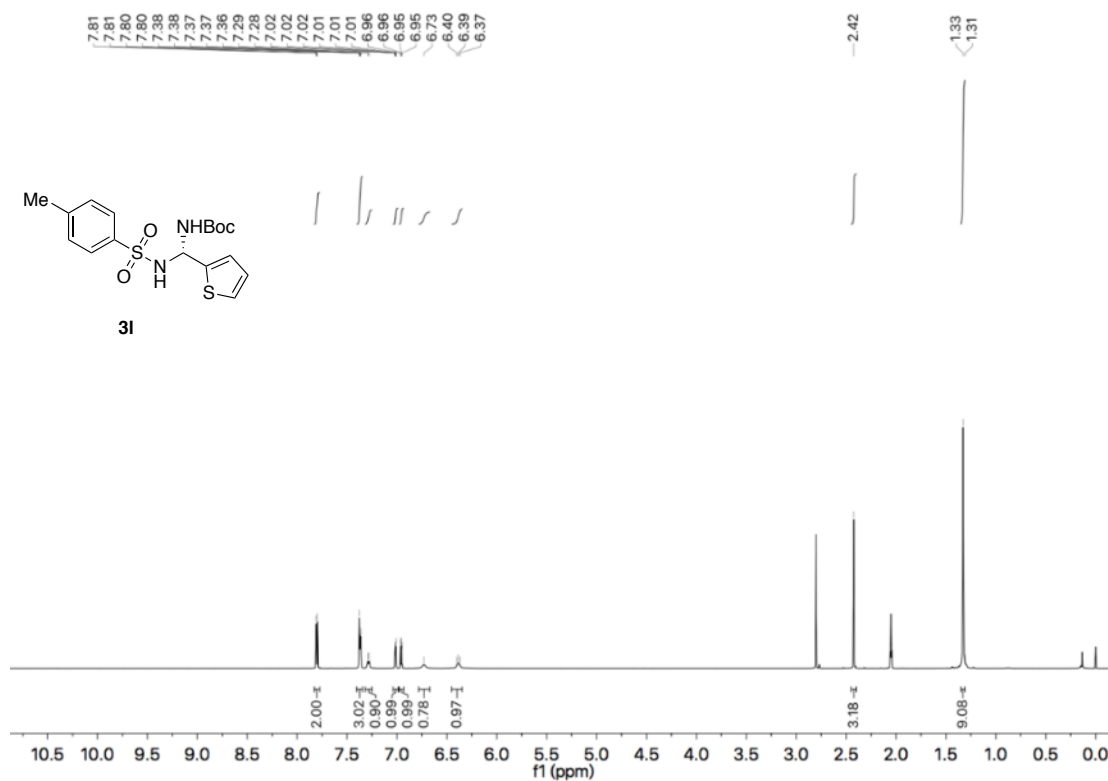

<sup>13</sup>C-NMR (150 MHz, Acetone-*d*<sub>6</sub>) of compound of **31**

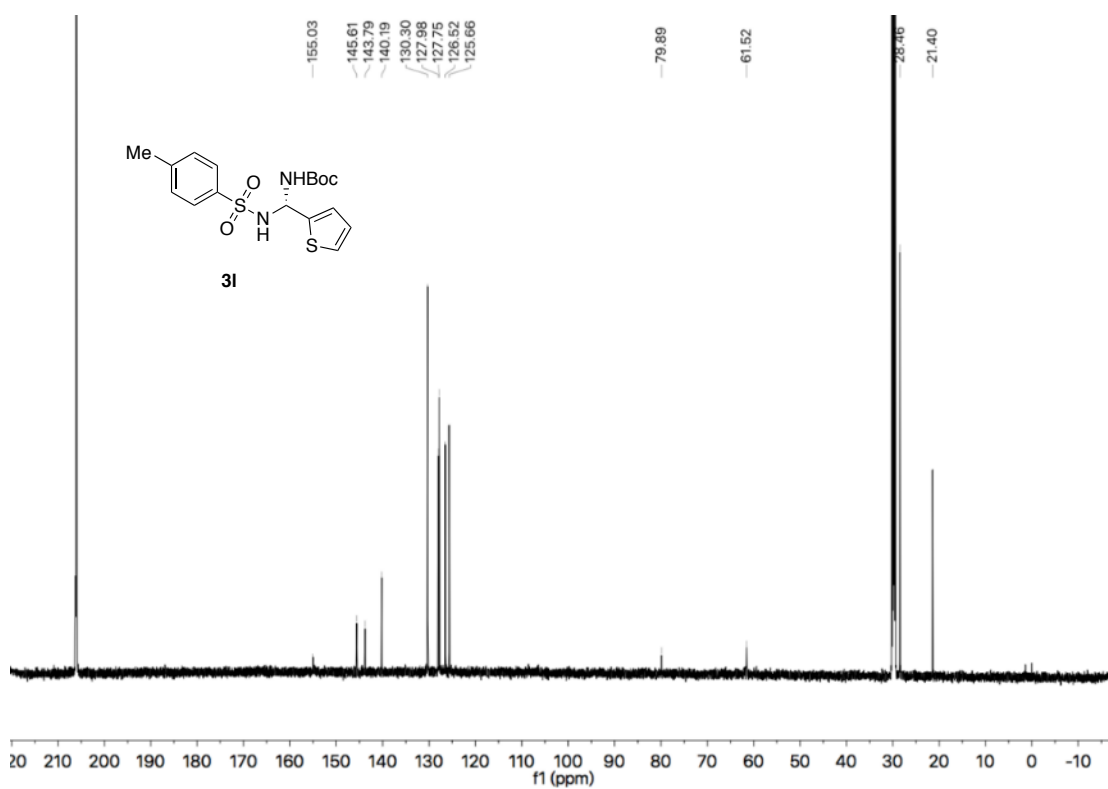

$^1\text{H}$ -NMR (600 MHz, Acetone- $d_6$ ) of compound of **3m**

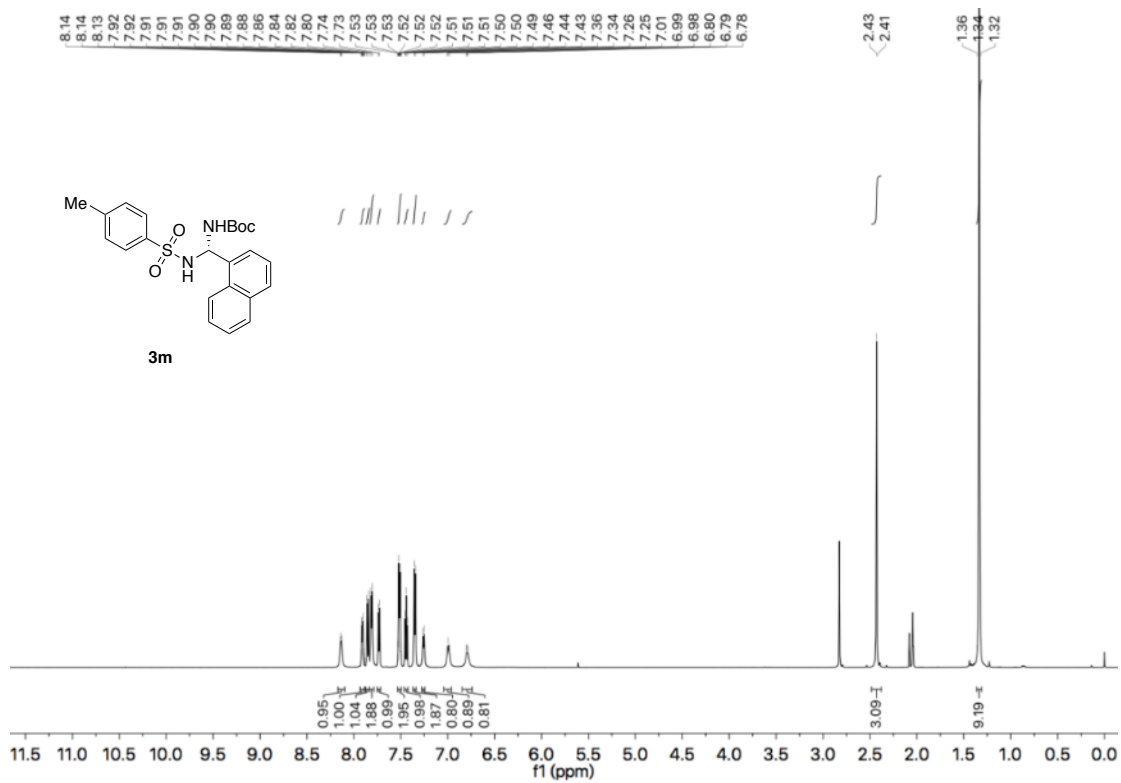

$^{13}\text{C}$ -NMR (150 MHz, Acetone- $d_6$ ) of compound of **3m**

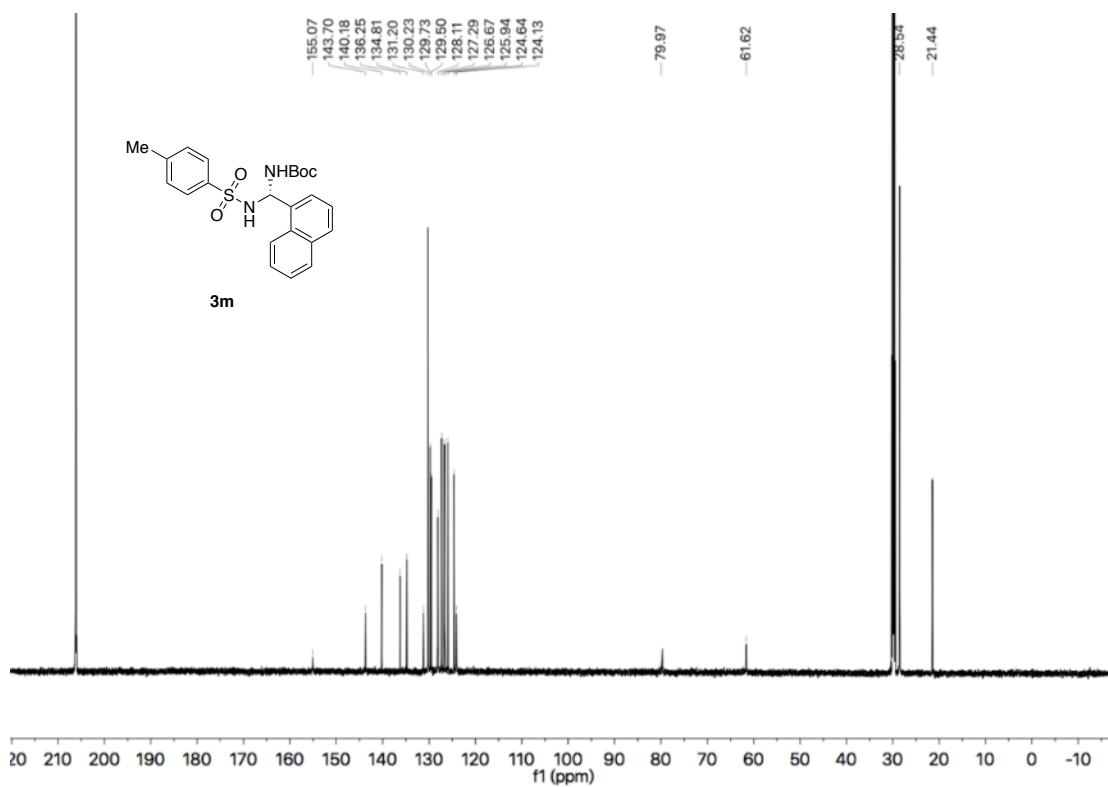

$^1\text{H}$ -NMR (600 MHz, Acetone- $d_6$ ) of compound of **3n**

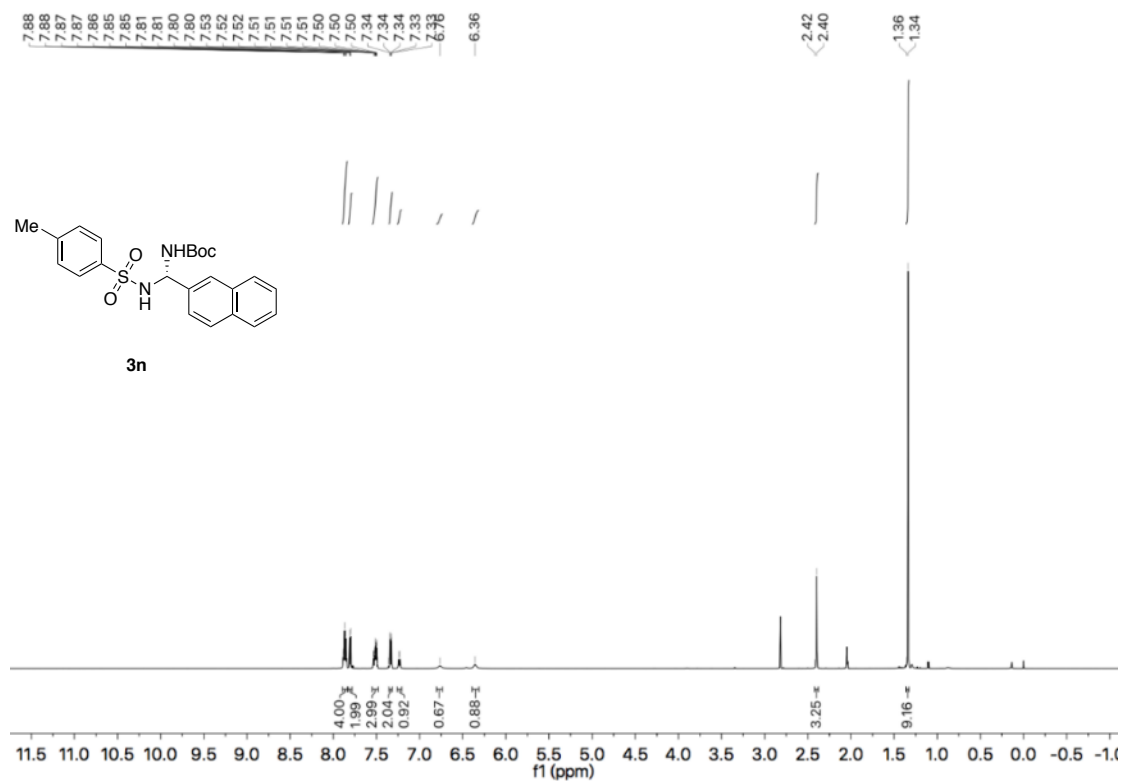

$^{13}\text{C}$ -NMR (150 MHz, Acetone- $d_6$ ) of compound of **3n**

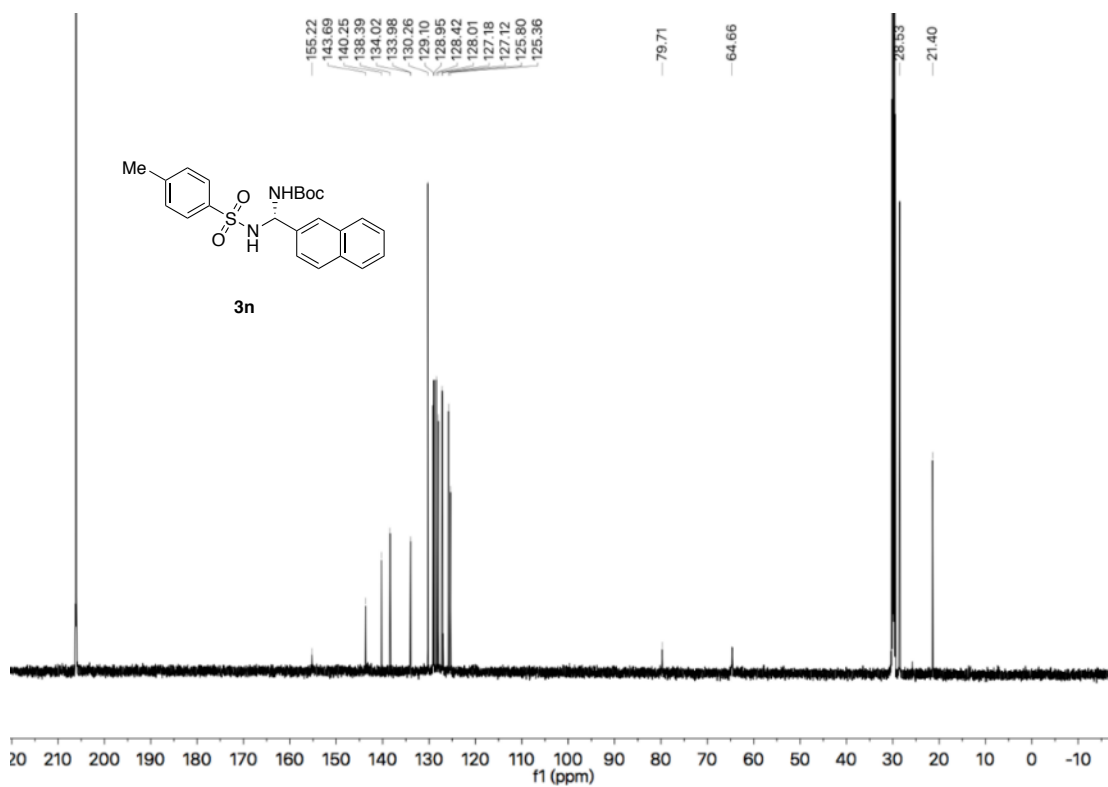

$^1\text{H}$ -NMR (600 MHz, Acetone- $d_6$ ) of compound of **3o**

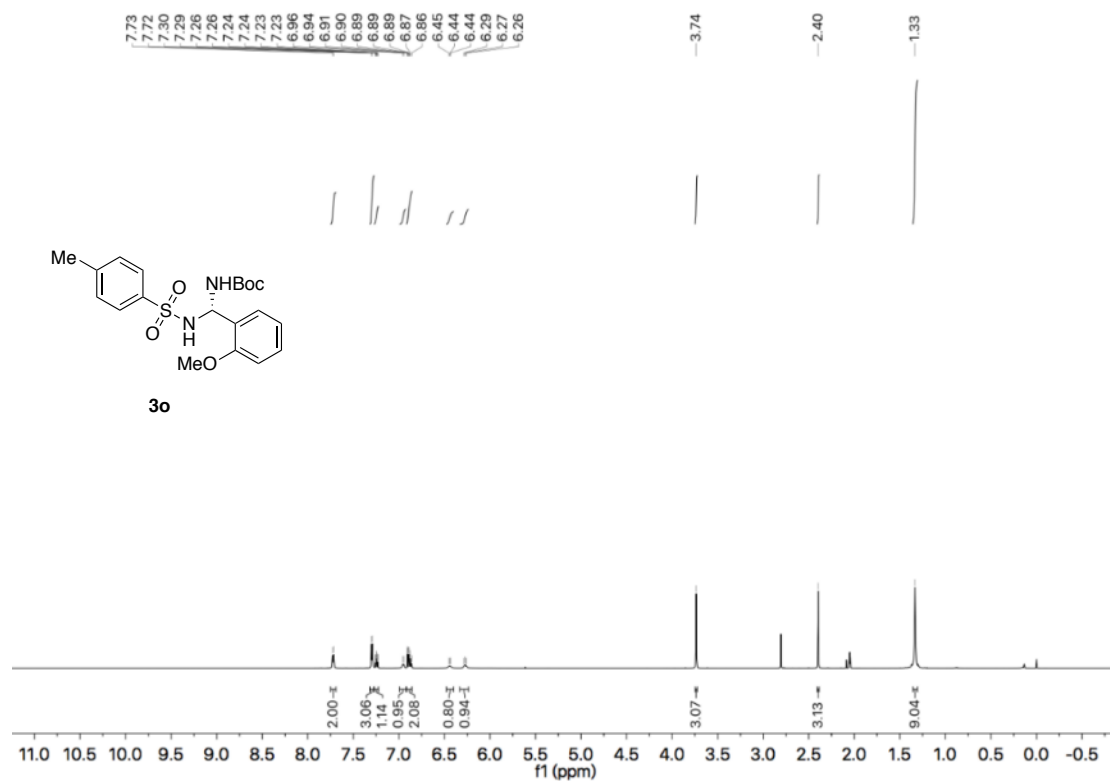

$^{13}\text{C}$ -NMR (150 MHz, Acetone- $d_6$ ) of compound of **3o**

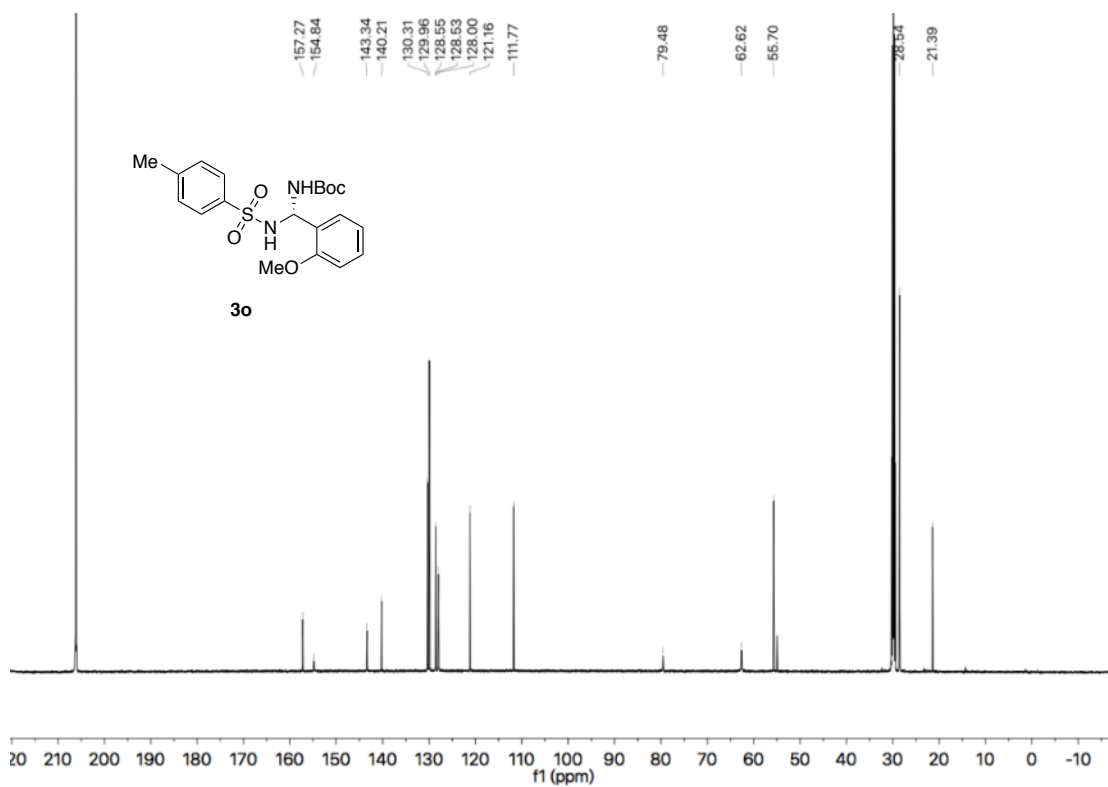



$^1\text{H}$ -NMR (600 MHz, Acetone- $d_6$ ) of compound of **3p**

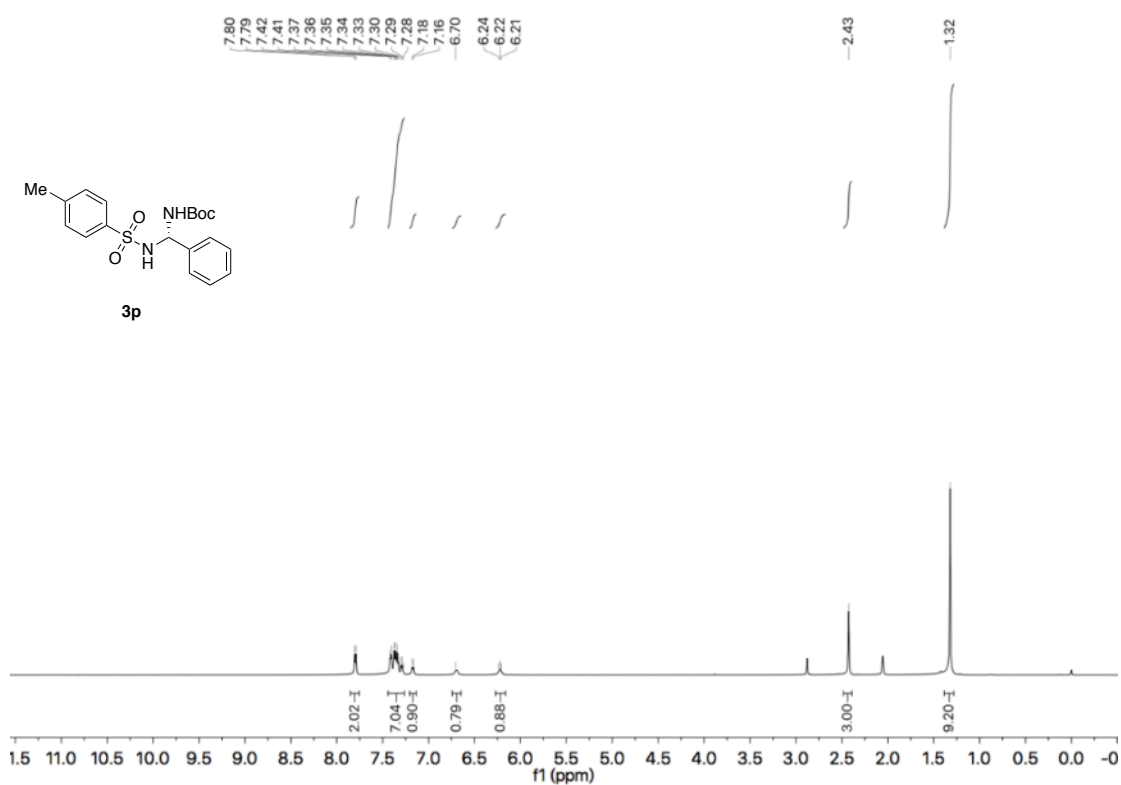

$^{13}\text{C}$ -NMR (150 MHz, Acetone- $d_6$ ) of compound of **3p**

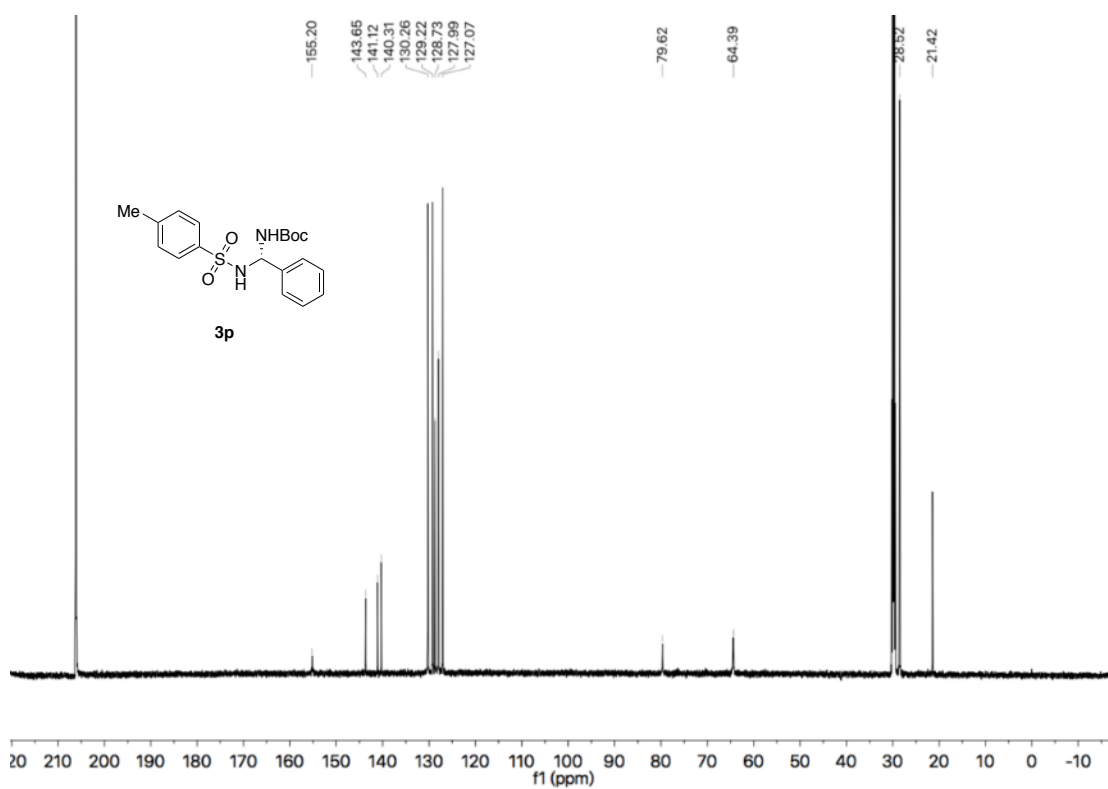

$^1\text{H}$ -NMR (400 MHz, Acetone- $d_6$ ) of compound of **3q**

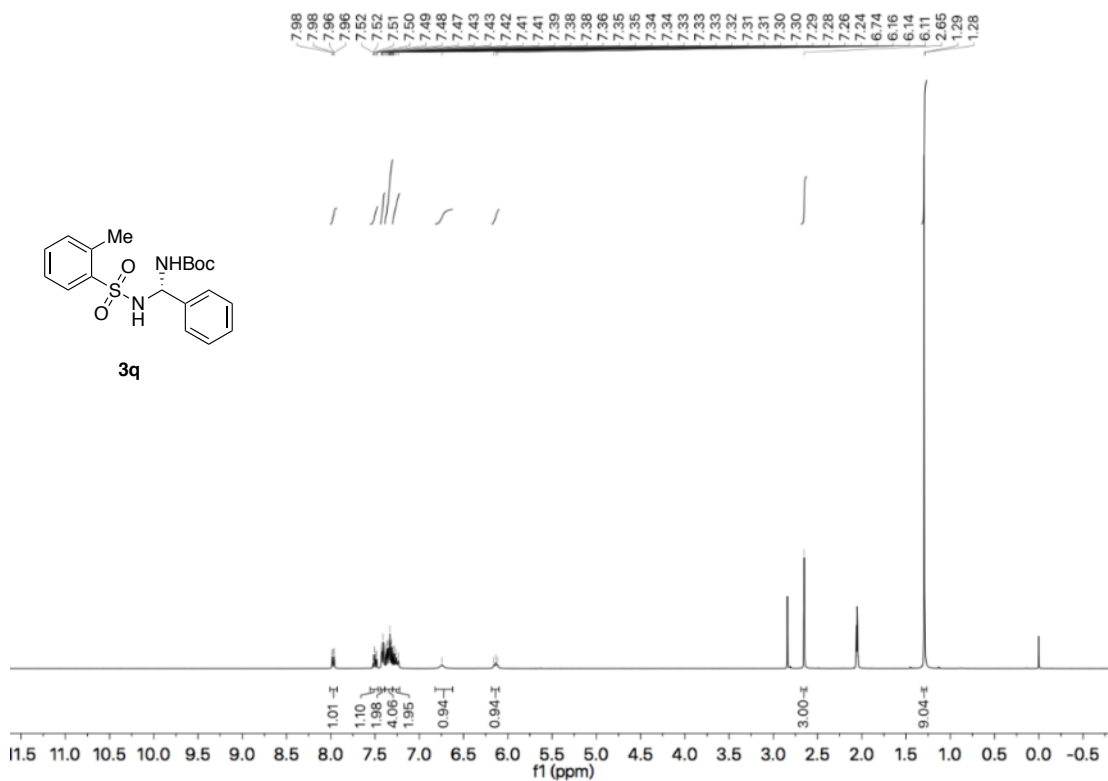

$^{13}\text{C}$ -NMR (100 MHz, Acetone- $d_6$ ) of compound of **3q**

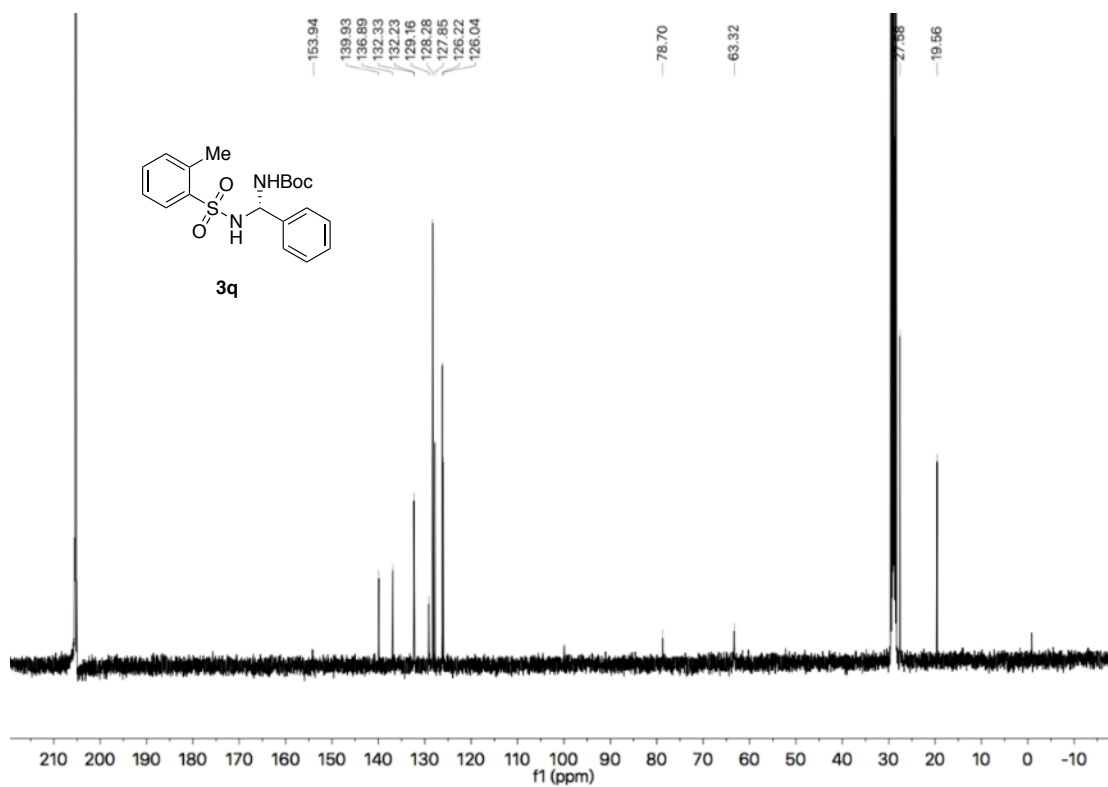

$^1\text{H}$ -NMR (600 MHz, Acetone- $d_6$ ) of compound of **3r**

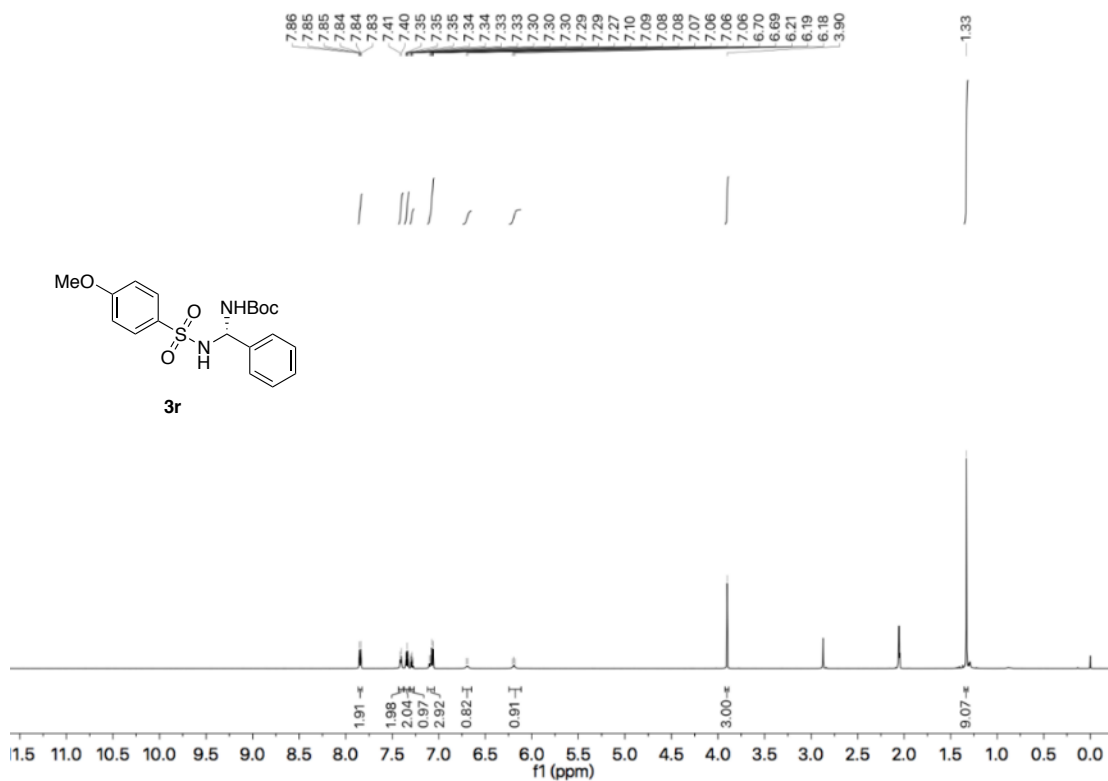

$^{13}\text{C}$ -NMR (150 MHz, Acetone- $d_6$ ) of compound of **3r**

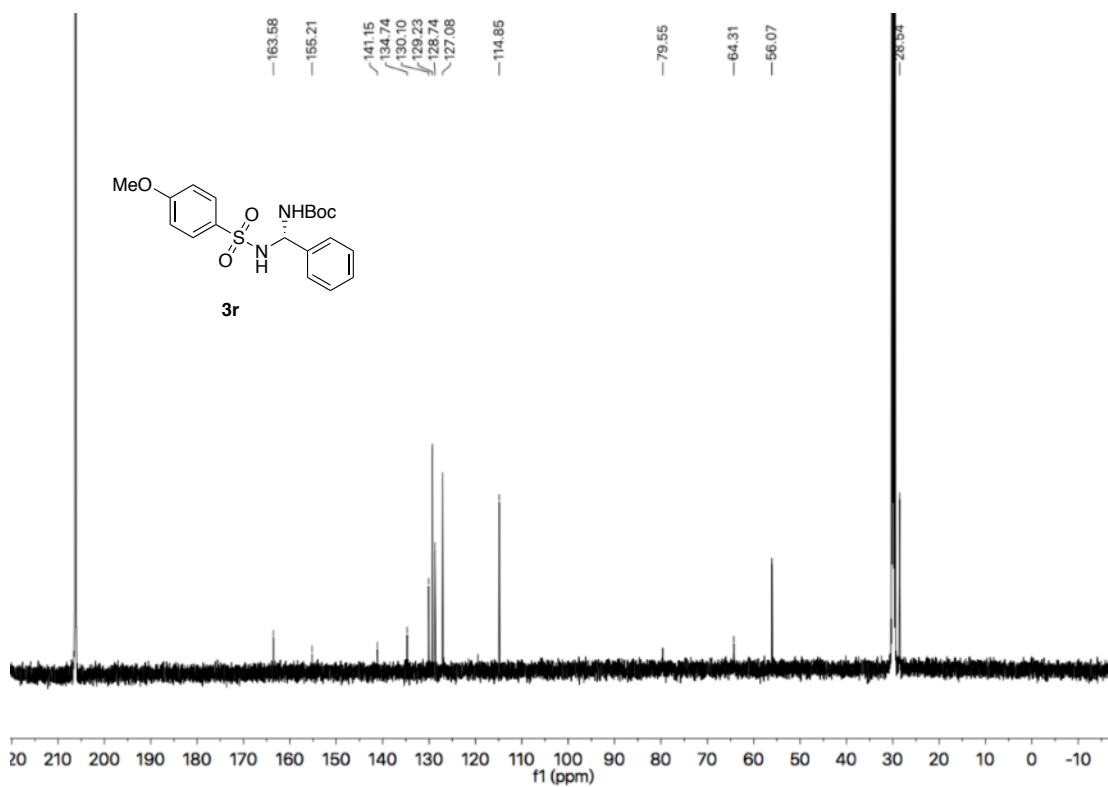

$^1\text{H}$ -NMR (600 MHz, Acetone- $d_6$ ) of compound of **3s**

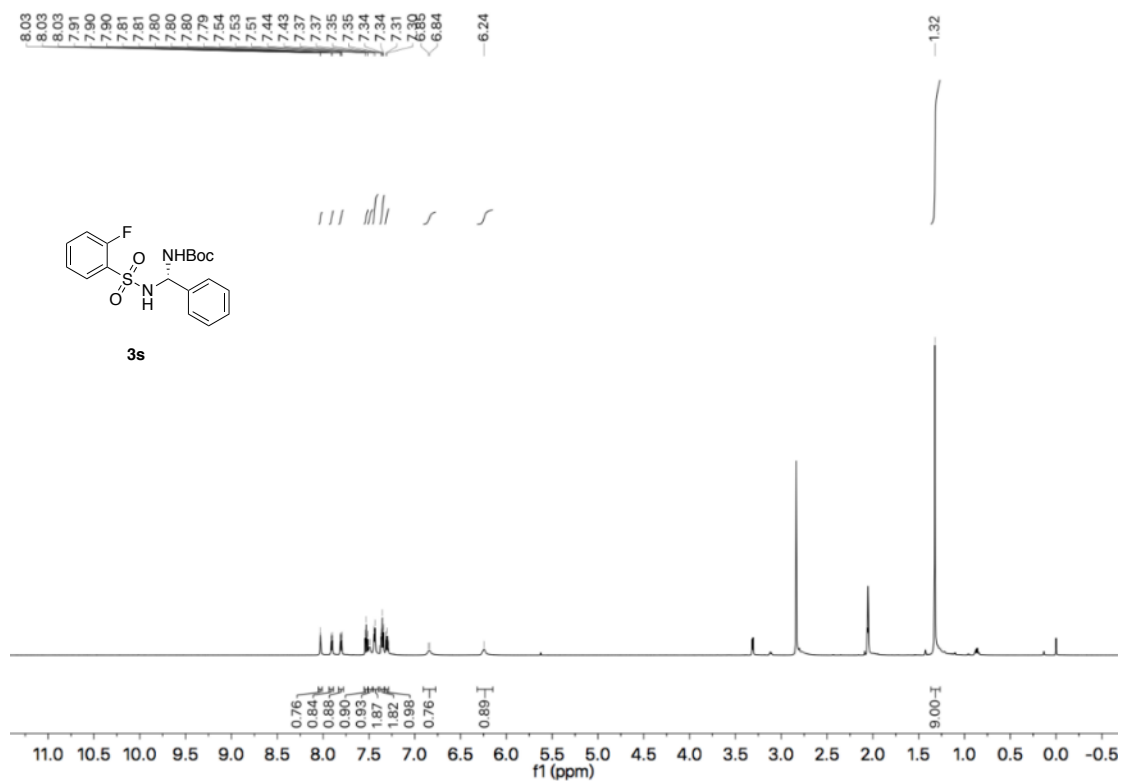

$^{13}\text{C}$ -NMR (150 MHz, Acetone- $d_6$ ) of compound of **3s**

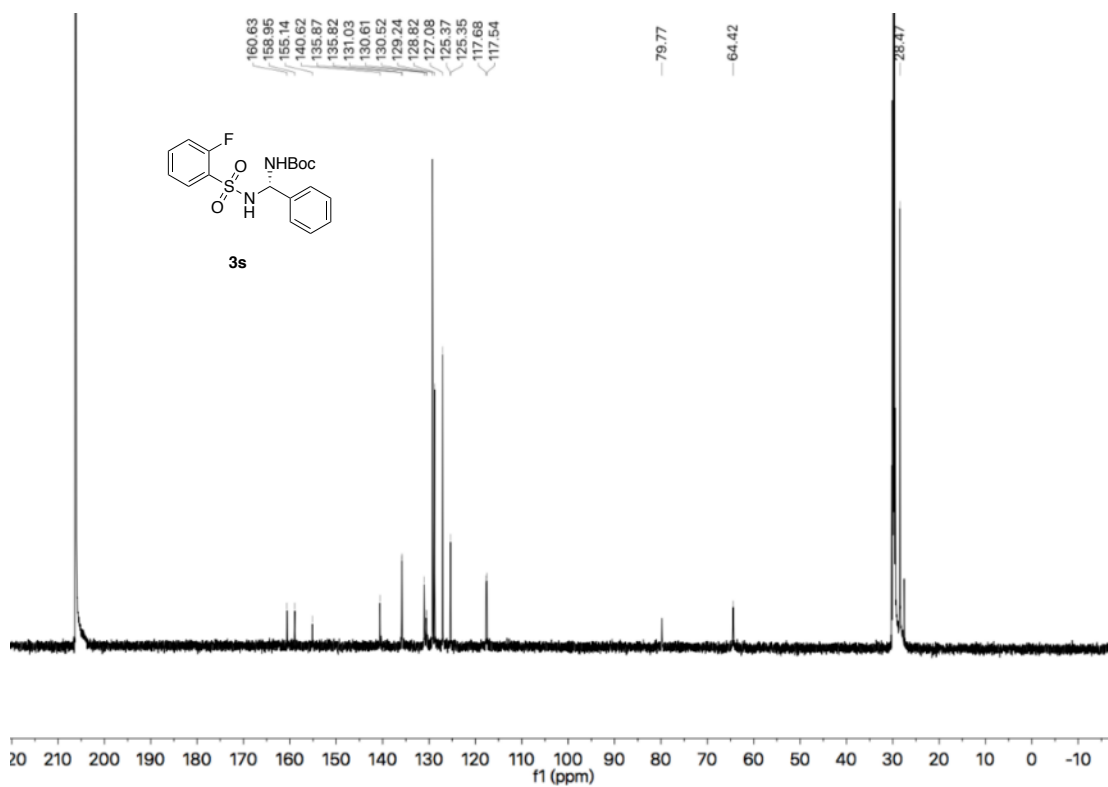

$^1\text{H}$ -NMR (600 MHz, Acetone- $d_6$ ) of compound of **3t**

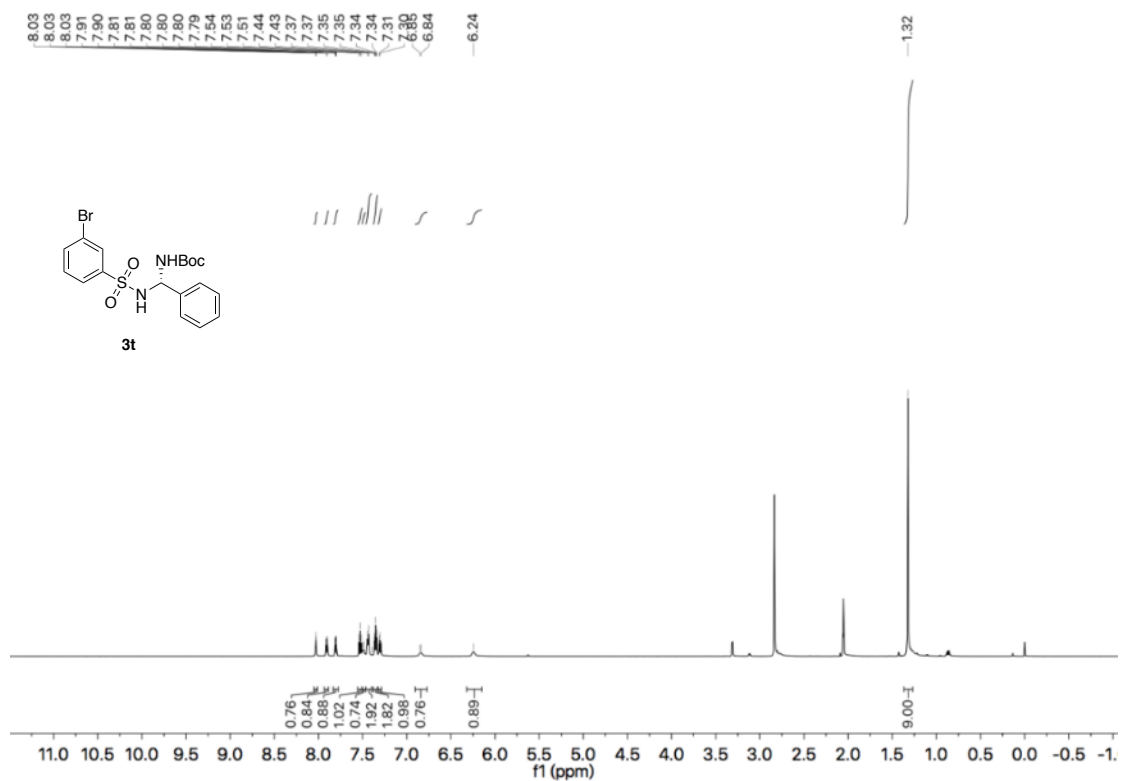

$^{13}\text{C}$ -NMR (150 MHz, Acetone- $d_6$ ) of compound of **3t**

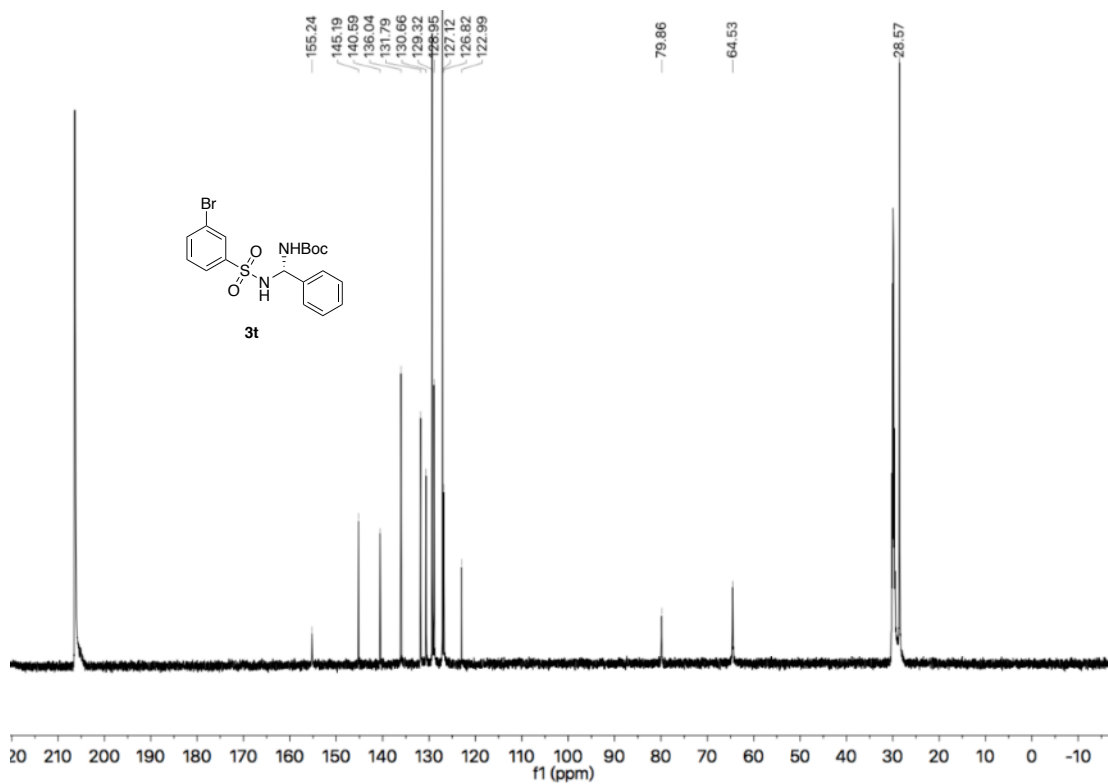

Chemical structure of **3u**: Clc1ccc(cc1)S(=O)(=O)N[C@@H](Cc2ccccc2)C(=O)N[C@@H](Cc3ccccc3)C(=O)N

<sup>1</sup>H NMR spectrum (CDCl<sub>3</sub>) of **3u**. The x-axis represents the chemical shift in ppm (f1), ranging from -0.1 to 12.0. The spectrum shows several peaks, with integration values indicated below the baseline and chemical shift values listed on the right.

Integration values (from left to right): 2.00, 2.02, 2.03, 3.03, 1.01, 0.78, 0.91, 9.18.

Chemical shift values (ppm) listed on the right: 7.92, 7.91, 7.90, 7.90, 7.90, 7.60, 7.59, 7.58, 7.58, 7.44, 7.44, 7.42, 7.38, 7.37, 7.37, 7.36, 7.36, 7.35, 7.35, 7.34, 7.34, 7.31, 7.31, 7.31, 6.72, 6.24, 6.23, 6.21, 1.32.

Chemical structure of **3u**: Clc1ccc(cc1)S(=O)(=O)N[C@H](c2ccccc2)C(=O)O

<sup>13</sup>C NMR spectrum (ppm):

- 208.48
- 155.18
- 141.98
- 140.75
- 138.74
- 129.69
- 129.23
- 129.26
- 128.64
- 127.08
- 79.77
- 64.42
- 29.48

$^1\text{H}$ -NMR (600 MHz, Acetone- $d_6$ ) of compound of **3v**

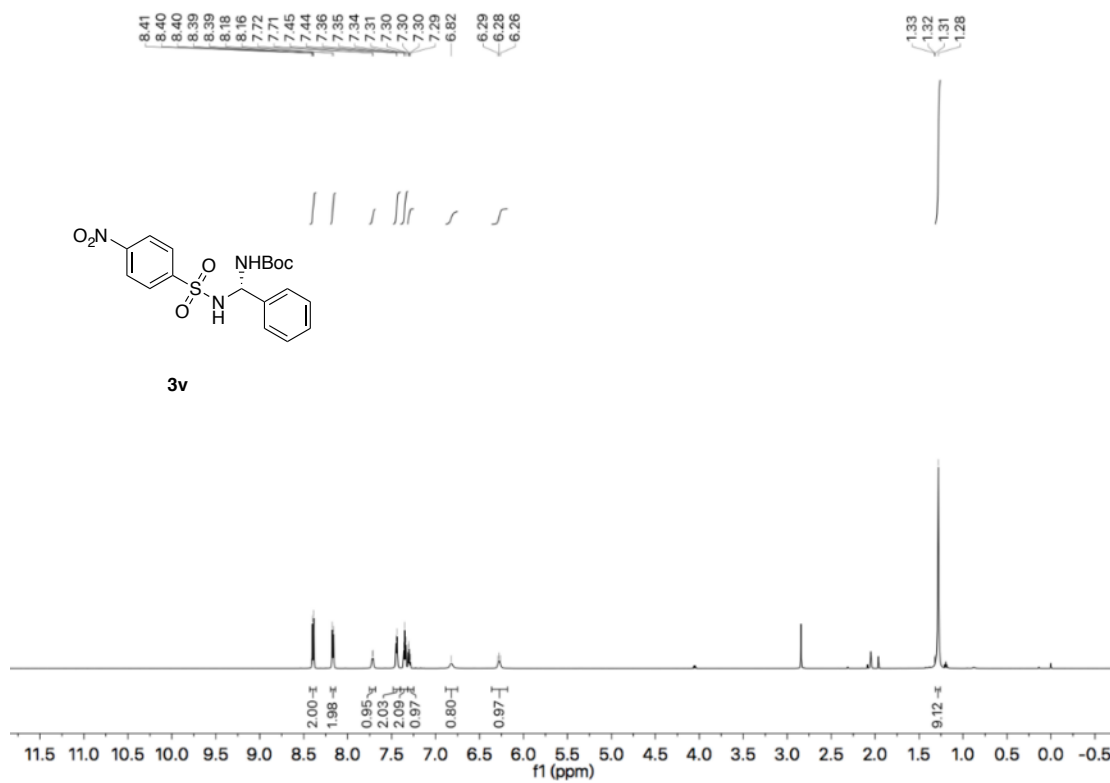

$^{13}\text{C}$ -NMR (150 MHz, Acetone- $d_6$ ) of compound of **3v**

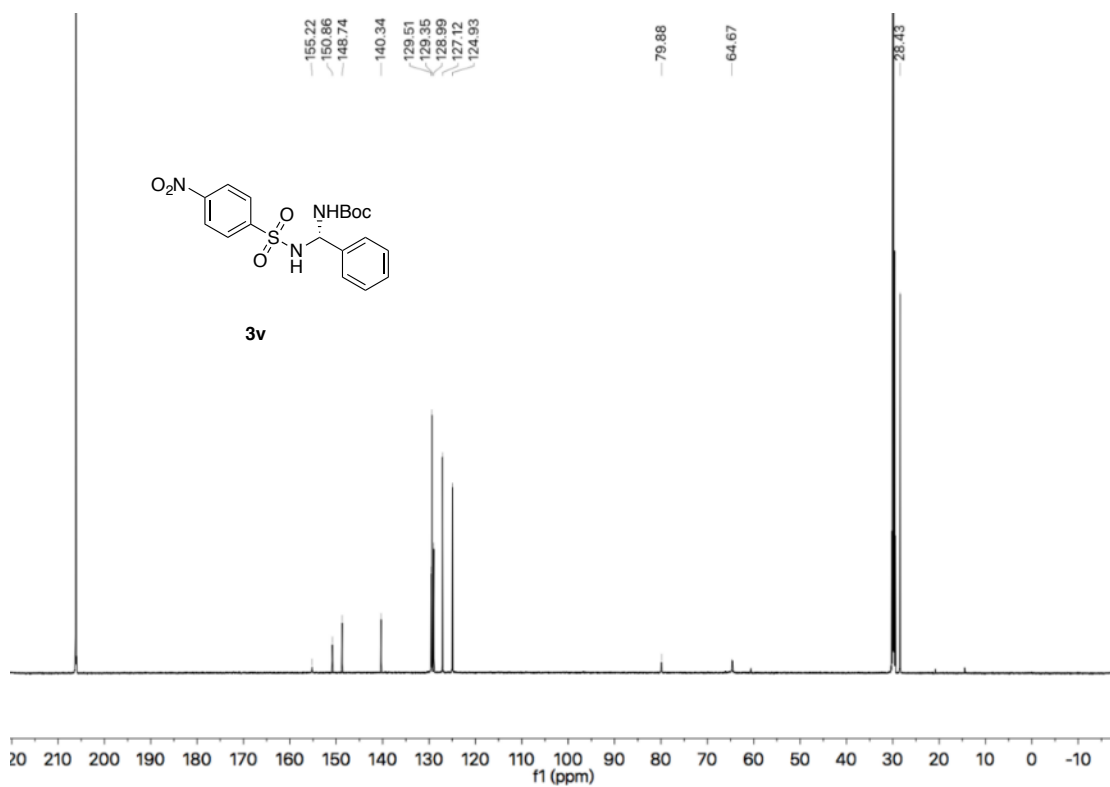

$^1\text{H}$ -NMR (600 MHz, Acetone- $d_6$ ) of compound of **3w**

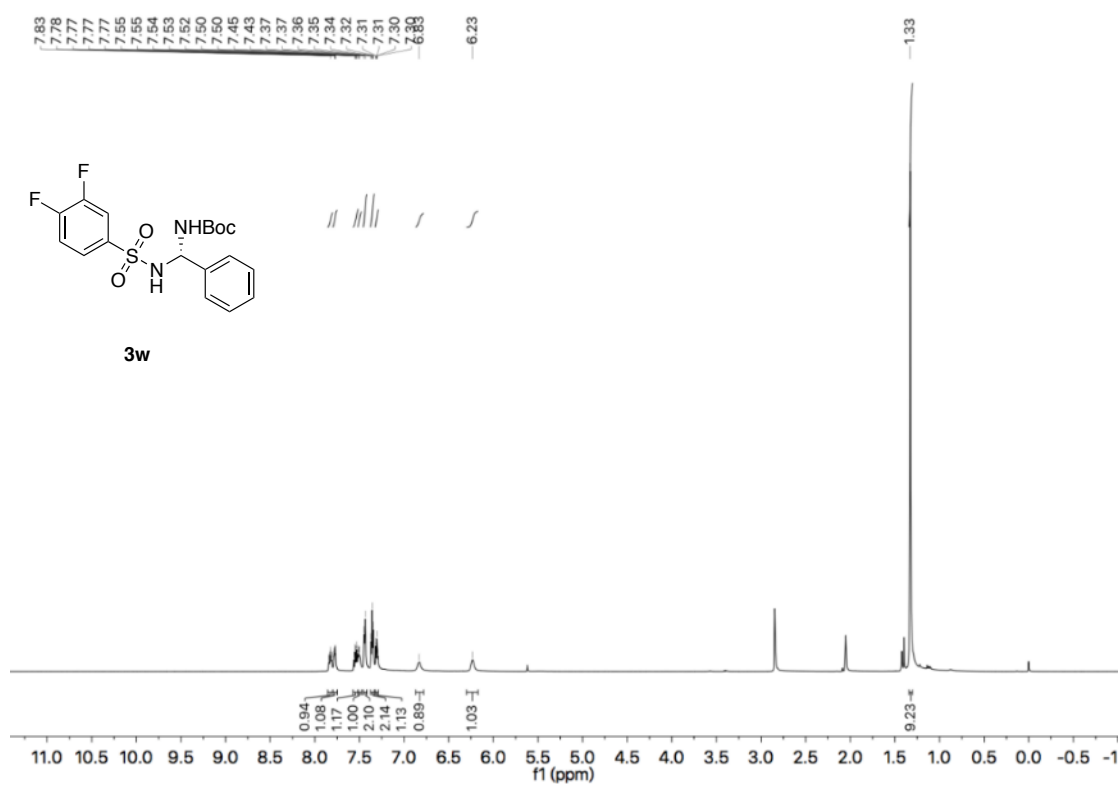

$^{13}\text{C}$ -NMR (150 MHz, Acetone- $d_6$ ) of compound of **3w**

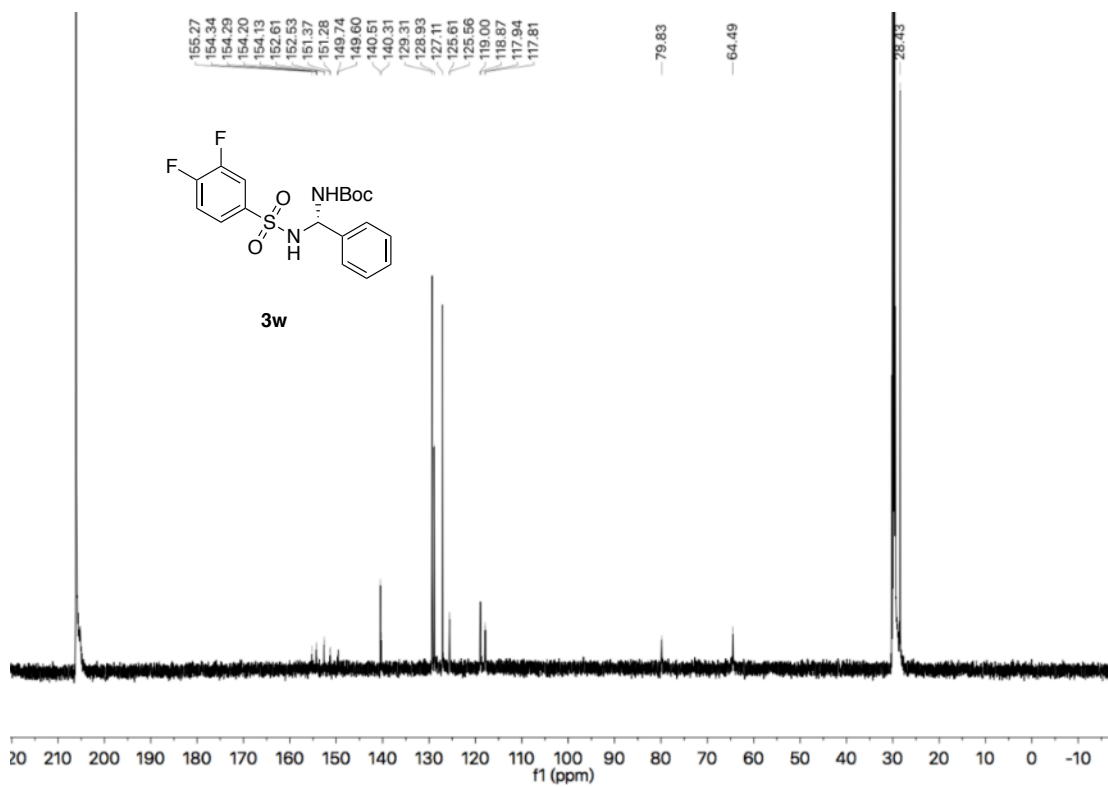



$^1\text{H}$ -NMR (600 MHz, Acetone- $d_6$ ) of compound of **3x**

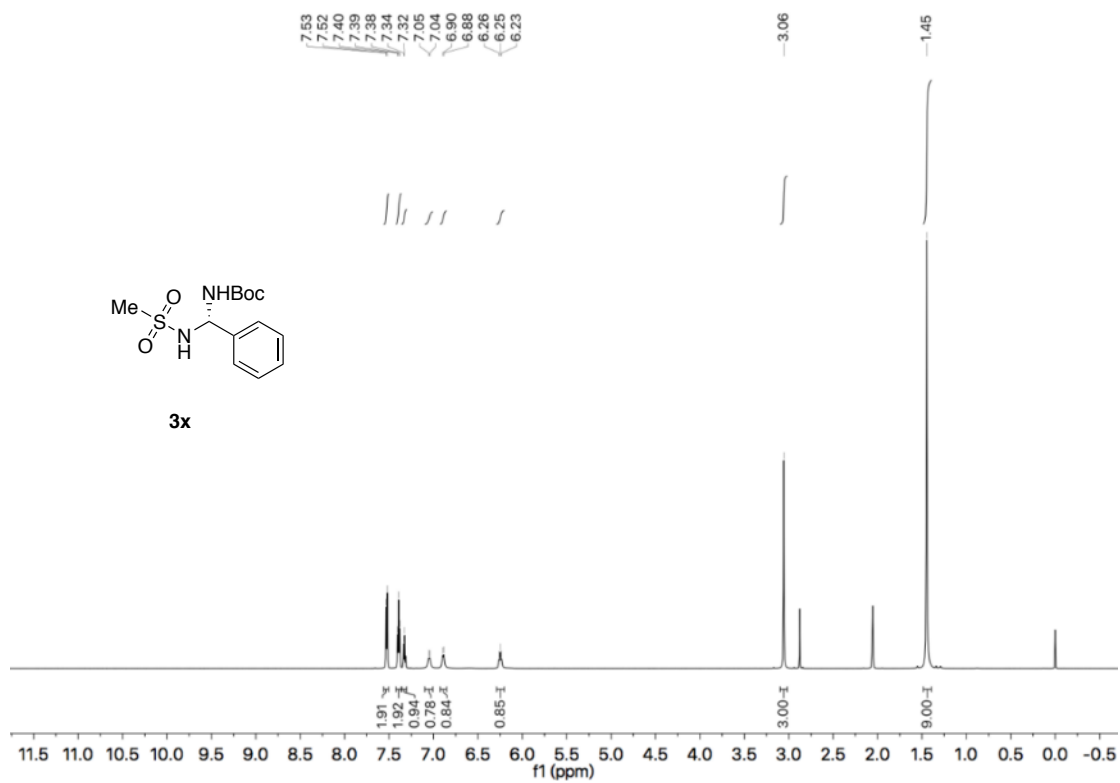

$^{13}\text{C}$ -NMR (150 MHz, Acetone- $d_6$ ) of compound of **3x**

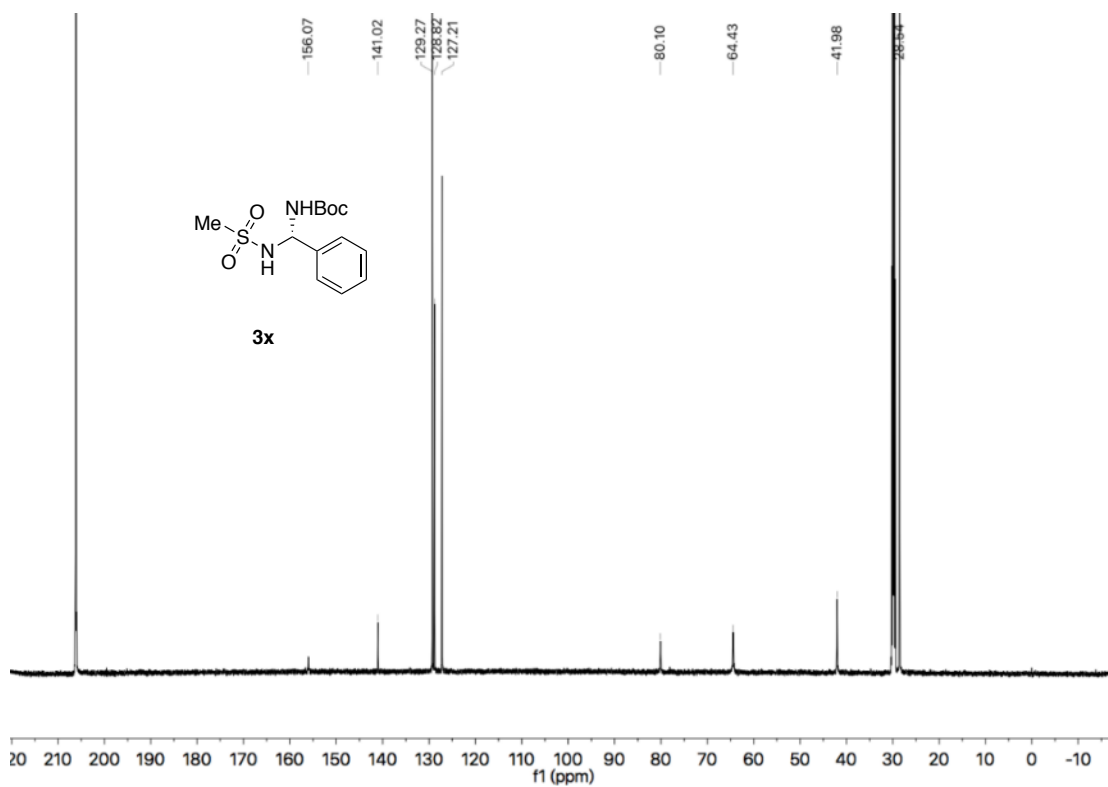

Supplement: Supplementary file 1 [file 23857150]
